# Supplementary material for: SON and SRRM2 form nuclear speckles in human cells
Source: bioRxiv preprint, doi:10.1101/2020.06.19.160762, version 1 (2020-06-20)
Supplement: Supplemental Table 2 [file 160762_file04.xlsx]

## Sheet: proteinGroups
Protein IDs	Majority protein IDs	Peptide counts (all)	Peptide counts (razor+unique)	Peptide counts (unique)	Protein names	Gene names	Fasta headers	Number of proteins	Peptides	Razor + unique peptides	Unique peptides	Peptides 1_IgG_1	Peptides 2_IgG_2	Peptides 3_IgG_3	Peptides 4_SC35_1	Peptides 5_SC35_2	Peptides 6_SC35_3	Razor + unique peptides 1_IgG_1	Razor + unique peptides 2_IgG_2	Razor + unique peptides 3_IgG_3	Razor + unique peptides 4_SC35_1	Razor + unique peptides 5_SC35_2	Razor + unique peptides 6_SC35_3	Unique peptides 1_IgG_1	Unique peptides 2_IgG_2	Unique peptides 3_IgG_3	Unique peptides 4_SC35_1	Unique peptides 5_SC35_2	Unique peptides 6_SC35_3	Sequence coverage [%]	Unique + razor sequence coverage [%]	Unique sequence coverage [%]	Mol. weight [kDa]	Sequence length	Sequence lengths	Q-value	Score	Sequence coverage 1_IgG_1 [%]	Sequence coverage 2_IgG_2 [%]	Sequence coverage 3_IgG_3 [%]	Sequence coverage 4_SC35_1 [%]	Sequence coverage 5_SC35_2 [%]	Sequence coverage 6_SC35_3 [%]	Intensity	Intensity 1_IgG_1	Intensity 2_IgG_2	Intensity 3_IgG_3	Intensity 4_SC35_1	Intensity 5_SC35_2
Q9UQ35	Q9UQ35	227	227	227	Serine/arginine repetitive matrix protein 2	SRRM2	sp|Q9UQ35|SRRM2_HUMAN Serine/arginine repetitive matrix protein 2 OS=Homo sapiens OX=9606 GN=SRRM2 PE=1 SV=2	1	227	227	227	1	1	1	204	197	215	1	1	1	204	197	215	1	1	1	204	197	215	61.9	61.9	61.9	299.61	2752	2752	0	323.31	0.7	0.7	0.7	58	58.5	60	205090000000	2042300	1997600	3010100	58024000000	62611000000
Q8IYB3	Q8IYB3	65	65	65	Serine/arginine repetitive matrix protein 1	SRRM1	sp|Q8IYB3|SRRM1_HUMAN Serine/arginine repetitive matrix protein 1 OS=Homo sapiens OX=9606 GN=SRRM1 PE=1 SV=2	1	65	65	65	0	0	0	49	56	58	0	0	0	49	56	58	0	0	0	49	56	58	55	55	55	102.33	904	904	0	323.31	0	0	0	39.4	47.6	48.8	12835000000	0	0	0	3317900000	4867500000
P84103	P84103	20	19	19	Serine/arginine-rich splicing factor 3	SRSF3	sp|P84103|SRSF3_HUMAN Serine/arginine-rich splicing factor 3 OS=Homo sapiens OX=9606 GN=SRSF3 PE=1 SV=1	1	20	19	19	2	0	0	19	19	18	2	0	0	18	18	17	2	0	0	18	18	17	62.8	62.8	62.8	19.329	164	164	0	323.31	26.2	0	0	62.8	62.8	62.8	8116800000	2228400	0	0	2143500000	4219200000
Q9BY77	Q9BY77	59	59	59	Polymerase delta-interacting protein 3	POLDIP3	sp|Q9BY77|PDIP3_HUMAN Polymerase delta-interacting protein 3 OS=Homo sapiens OX=9606 GN=POLDIP3 PE=1 SV=2	1	59	59	59	2	1	0	53	45	52	2	1	0	53	45	52	2	1	0	53	45	52	93.8	93.8	93.8	46.089	421	421	0	323.31	7.1	4	0	93.6	86	93.6	7896500000	1404700	988950	0	2674800000	2300000000
Q13573	Q13573	63	63	63	SNW domain-containing protein 1	SNW1	sp|Q13573|SNW1_HUMAN SNW domain-containing protein 1 OS=Homo sapiens OX=9606 GN=SNW1 PE=1 SV=1	1	63	63	63	1	0	0	44	52	51	1	0	0	44	52	51	1	0	0	44	52	51	76.1	76.1	76.1	61.494	536	536	0	323.31	2.8	0	0	64.2	73.1	67.4	7008100000	596680	0	0	1808400000	2312300000
Q9UKV3	Q9UKV3	70	70	70	Apoptotic chromatin condensation inducer in the nucleus	ACIN1	sp|Q9UKV3|ACINU_HUMAN Apoptotic chromatin condensation inducer in the nucleus OS=Homo sapiens OX=9606 GN=ACIN1 PE=1 SV=2	1	70	70	70	0	0	0	57	62	63	0	0	0	57	62	63	0	0	0	57	62	63	41.8	41.8	41.8	151.86	1341	1341	0	323.31	0	0	0	38.2	37.6	40.1	6943900000	0	0	0	2200800000	2378600000
O75643	O75643	108	108	108	U5 small nuclear ribonucleoprotein 200 kDa helicase	SNRNP200	sp|O75643|U520_HUMAN U5 small nuclear ribonucleoprotein 200 kDa helicase OS=Homo sapiens OX=9606 GN=SNRNP200 PE=1 SV=2	1	108	108	108	0	0	0	63	94	84	0	0	0	63	94	84	0	0	0	63	94	84	49.6	49.6	49.6	244.5	2136	2136	0	323.31	0	0	0	30.9	45.9	40.1	6919300000	0	0	0	1847500000	2426900000
P38919	P38919	41	41	39	Eukaryotic initiation factor 4A-III;Eukaryotic initiation factor 4A-III, N-terminally processed	EIF4A3	sp|P38919|IF4A3_HUMAN Eukaryotic initiation factor 4A-III OS=Homo sapiens OX=9606 GN=EIF4A3 PE=1 SV=4	1	41	41	39	0	2	1	33	38	34	0	2	1	33	38	34	0	1	1	31	36	32	74	74	74	46.871	411	411	0	323.31	0	7.1	3.2	61.8	72.3	63	6513000000	0	1629400	847680	2086800000	2453200000
Q9H307	Q9H307	49	49	49	Pinin	PNN	sp|Q9H307|PININ_HUMAN Pinin OS=Homo sapiens OX=9606 GN=PNN PE=1 SV=5	1	49	49	49	0	0	0	41	39	47	0	0	0	41	39	47	0	0	0	41	39	47	44.2	44.2	44.2	81.627	717	717	0	323.31	0	0	0	34.7	39.5	42.5	5134400000	0	0	0	1505300000	1526400000
Q6PJT7	Q6PJT7	61	61	61	Zinc finger CCCH domain-containing protein 14	ZC3H14	sp|Q6PJT7|ZC3HE_HUMAN Zinc finger CCCH domain-containing protein 14 OS=Homo sapiens OX=9606 GN=ZC3H14 PE=1 SV=1	1	61	61	61	0	0	0	52	48	57	0	0	0	52	48	57	0	0	0	52	48	57	71.9	71.9	71.9	82.875	736	736	0	323.31	0	0	0	67.1	65.2	69.3	4958700000	0	0	0	1627400000	1453200000
P84090	P84090	10	10	10	Enhancer of rudimentary homolog	ERH	sp|P84090|ERH_HUMAN Enhancer of rudimentary homolog OS=Homo sapiens OX=9606 GN=ERH PE=1 SV=1	1	10	10	10	0	0	0	8	9	9	0	0	0	8	9	9	0	0	0	8	9	9	62.5	62.5	62.5	12.259	104	104	0	323.31	0	0	0	62.5	62.5	62.5	4553300000	0	0	0	1423700000	1902300000
Q99459	Q99459	75	75	75	Cell division cycle 5-like protein	CDC5L	sp|Q99459|CDC5L_HUMAN Cell division cycle 5-like protein OS=Homo sapiens OX=9606 GN=CDC5L PE=1 SV=2	1	75	75	75	0	0	0	53	62	61	0	0	0	53	62	61	0	0	0	53	62	61	75.6	75.6	75.6	92.25	802	802	0	323.31	0	0	0	63.7	70.6	73.7	4406600000	0	0	0	1095600000	1498300000
Q6P2Q9	Q6P2Q9	89	89	89	Pre-mRNA-processing-splicing factor 8	PRPF8	sp|Q6P2Q9|PRP8_HUMAN Pre-mRNA-processing-splicing factor 8 OS=Homo sapiens OX=9606 GN=PRPF8 PE=1 SV=2	1	89	89	89	0	0	0	53	81	70	0	0	0	53	81	70	0	0	0	53	81	70	36.2	36.2	36.2	273.6	2335	2335	0	323.31	0	0	0	20.4	32.8	28.8	4371800000	0	0	0	1075100000	1698100000
O94906	O94906	83	83	83	Pre-mRNA-processing factor 6	PRPF6	sp|O94906|PRP6_HUMAN Pre-mRNA-processing factor 6 OS=Homo sapiens OX=9606 GN=PRPF6 PE=1 SV=1	1	83	83	83	0	0	0	57	66	67	0	0	0	57	66	67	0	0	0	57	66	67	66.2	66.2	66.2	106.92	941	941	0	323.31	0	0	0	53.8	59.5	60.4	4203700000	0	0	0	1039000000	1506400000
Q9Y2W1	Q9Y2W1	50	49	49	Thyroid hormone receptor-associated protein 3	THRAP3	sp|Q9Y2W1|TR150_HUMAN Thyroid hormone receptor-associated protein 3 OS=Homo sapiens OX=9606 GN=THRAP3 PE=1 SV=2	1	50	49	49	0	0	0	37	38	44	0	0	0	37	37	43	0	0	0	37	37	43	38.5	38.5	38.5	108.66	955	955	0	323.31	0	0	0	27.7	31.2	35.4	3795600000	0	0	0	1207100000	1037900000
Q96HS1	Q96HS1	40	40	40	Serine/threonine-protein phosphatase PGAM5, mitochondrial	PGAM5	sp|Q96HS1|PGAM5_HUMAN Serine/threonine-protein phosphatase PGAM5, mitochondrial OS=Homo sapiens OX=9606 GN=PGAM5 PE=1 SV=2	1	40	40	40	0	0	0	27	39	27	0	0	0	27	39	27	0	0	0	27	39	27	91.7	91.7	91.7	32.004	289	289	0	323.31	0	0	0	86.2	91.7	82.4	3483500000	0	0	0	873840000	1883200000
Q9NYF8	Q9NYF8	58	58	57	Bcl-2-associated transcription factor 1	BCLAF1	sp|Q9NYF8|BCLF1_HUMAN Bcl-2-associated transcription factor 1 OS=Homo sapiens OX=9606 GN=BCLAF1 PE=1 SV=2	1	58	58	57	0	0	0	48	49	49	0	0	0	48	49	49	0	0	0	48	48	48	47.5	47.5	47.5	106.12	920	920	0	323.31	0	0	0	44.2	45	43.4	3386600000	0	0	0	1056100000	981340000
P52272	P52272	55	55	55	Heterogeneous nuclear ribonucleoprotein M	HNRNPM	sp|P52272|HNRPM_HUMAN Heterogeneous nuclear ribonucleoprotein M OS=Homo sapiens OX=9606 GN=HNRNPM PE=1 SV=3	1	55	55	55	6	3	4	39	43	44	6	3	4	39	43	44	6	3	4	39	43	44	71.2	71.2	71.2	77.515	730	730	0	323.31	13.6	6.7	7.4	58.8	65.2	62.6	3325100000	7628300	4585600	3611700	861050000	1063200000
Q13427	Q13427	35	35	35	Peptidyl-prolyl cis-trans isomerase G	PPIG	sp|Q13427|PPIG_HUMAN Peptidyl-prolyl cis-trans isomerase G OS=Homo sapiens OX=9606 GN=PPIG PE=1 SV=2	1	35	35	35	0	0	0	29	32	25	0	0	0	29	32	25	0	0	0	29	32	25	40.7	40.7	40.7	88.616	754	754	0	323.31	0	0	0	33.8	39	35.9	3305200000	0	0	0	996680000	1207600000
Q96T37	Q96T37	74	74	69	Putative RNA-binding protein 15	RBM15	sp|Q96T37|RBM15_HUMAN RNA-binding protein 15 OS=Homo sapiens OX=9606 GN=RBM15 PE=1 SV=2	1	74	74	69	0	0	0	55	63	57	0	0	0	55	63	57	0	0	0	51	58	53	67.2	67.2	64.7	107.19	977	977	0	323.31	0	0	0	61	62	61.9	3195700000	0	0	0	993810000	1113900000
Q16629	Q16629	24	24	23	Serine/arginine-rich splicing factor 7	SRSF7	sp|Q16629|SRSF7_HUMAN Serine/arginine-rich splicing factor 7 OS=Homo sapiens OX=9606 GN=SRSF7 PE=1 SV=1	1	24	24	23	0	0	0	18	23	18	0	0	0	18	23	18	0	0	0	17	22	17	56.3	56.3	56.3	27.366	238	238	0	243.8	0	0	0	51.3	56.3	49.6	3162500000	0	0	0	616450000	1847400000
Q7Z6E9	Q7Z6E9	83	83	83	E3 ubiquitin-protein ligase RBBP6	RBBP6	sp|Q7Z6E9|RBBP6_HUMAN E3 ubiquitin-protein ligase RBBP6 OS=Homo sapiens OX=9606 GN=RBBP6 PE=1 SV=1	1	83	83	83	0	0	0	56	63	63	0	0	0	56	63	63	0	0	0	56	63	63	45.3	45.3	45.3	201.56	1792	1792	0	323.31	0	0	0	33.3	40.3	36.3	3076400000	0	0	0	789980000	944550000
Q92841	Q92841	63	63	45	Probable ATP-dependent RNA helicase DDX17	DDX17	sp|Q92841|DDX17_HUMAN Probable ATP-dependent RNA helicase DDX17 OS=Homo sapiens OX=9606 GN=DDX17 PE=1 SV=2	1	63	63	45	1	0	0	52	55	49	1	0	0	52	55	49	0	0	0	36	38	36	57.5	57.5	48	80.272	729	729	0	323.31	1.6	0	0	51.2	55.1	55.4	3063800000	0	0	0	748960000	1202500000
Q15287	Q15287	19	19	19	RNA-binding protein with serine-rich domain 1	RNPS1	sp|Q15287|RNPS1_HUMAN RNA-binding protein with serine-rich domain 1 OS=Homo sapiens OX=9606 GN=RNPS1 PE=1 SV=1	1	19	19	19	0	0	0	16	16	16	0	0	0	16	16	16	0	0	0	16	16	16	37.7	37.7	37.7	34.208	305	305	0	323.31	0	0	0	35.4	35.1	35.1	3014500000	0	0	0	919080000	1228800000
Q9Y3Y2	Q9Y3Y2	17	17	17	Chromatin target of PRMT1 protein	CHTOP	sp|Q9Y3Y2|CHTOP_HUMAN Chromatin target of PRMT1 protein OS=Homo sapiens OX=9606 GN=CHTOP PE=1 SV=2	1	17	17	17	0	0	0	14	13	15	0	0	0	14	13	15	0	0	0	14	13	15	51.6	51.6	51.6	26.396	248	248	0	323.31	0	0	0	49.2	45.2	46	2933500000	0	0	0	1045200000	957870000
Q13435	Q13435	51	51	51	Splicing factor 3B subunit 2	SF3B2	sp|Q13435|SF3B2_HUMAN Splicing factor 3B subunit 2 OS=Homo sapiens OX=9606 GN=SF3B2 PE=1 SV=2	1	51	51	51	0	0	0	37	42	43	0	0	0	37	42	43	0	0	0	37	42	43	58	58	58	100.23	895	895	0	323.31	0	0	0	52.8	56	51.6	2892600000	0	0	0	758250000	887400000
Q5T200	Q5T200	62	62	62	Zinc finger CCCH domain-containing protein 13	ZC3H13	sp|Q5T200|ZC3HD_HUMAN Zinc finger CCCH domain-containing protein 13 OS=Homo sapiens OX=9606 GN=ZC3H13 PE=1 SV=1	1	62	62	62	0	0	0	37	51	40	0	0	0	37	51	40	0	0	0	37	51	40	33.4	33.4	33.4	196.63	1668	1668	0	323.31	0	0	0	25.8	30.2	25.4	2719300000	0	0	0	838300000	869810000
Q15029	Q15029	66	66	65	116 kDa U5 small nuclear ribonucleoprotein component	EFTUD2	sp|Q15029|U5S1_HUMAN 116 kDa U5 small nuclear ribonucleoprotein component OS=Homo sapiens OX=9606 GN=EFTUD2 PE=1 SV=1	1	66	66	65	0	0	0	47	61	50	0	0	0	47	61	50	0	0	0	47	60	50	61.4	61.4	61.4	109.43	972	972	0	323.31	0	0	0	54.6	57.2	56.5	2654600000	0	0	0	557320000	1380300000
O75400	O75400	42	42	42	Pre-mRNA-processing factor 40 homolog A	PRPF40A	sp|O75400|PR40A_HUMAN Pre-mRNA-processing factor 40 homolog A OS=Homo sapiens OX=9606 GN=PRPF40A PE=1 SV=2	1	42	42	42	0	0	0	27	36	36	0	0	0	27	36	36	0	0	0	27	36	36	32.6	32.6	32.6	108.8	957	957	0	323.31	0	0	0	27.3	29.3	30.2	2602100000	0	0	0	686030000	902300000
O95926	O95926	21	21	21	Pre-mRNA-splicing factor SYF2	SYF2	sp|O95926|SYF2_HUMAN Pre-mRNA-splicing factor SYF2 OS=Homo sapiens OX=9606 GN=SYF2 PE=1 SV=1	1	21	21	21	0	0	0	19	17	17	0	0	0	19	17	17	0	0	0	19	17	17	74.1	74.1	74.1	28.722	243	243	0	323.31	0	0	0	63.4	55.1	60.9	2575500000	0	0	0	1024100000	1320400000
P62995	P62995	27	27	23	Transformer-2 protein homolog beta	TRA2B	sp|P62995|TRA2B_HUMAN Transformer-2 protein homolog beta OS=Homo sapiens OX=9606 GN=TRA2B PE=1 SV=1	1	27	27	23	0	0	0	21	25	18	0	0	0	21	25	18	0	0	0	18	21	16	58	58	51.7	33.665	288	288	0	323.31	0	0	0	53.5	58	52.1	2566300000	0	0	0	730430000	1273200000
P18583	P18583	67	67	67	Protein SON	SON	sp|P18583|SON_HUMAN Protein SON OS=Homo sapiens OX=9606 GN=SON PE=1 SV=4	1	67	67	67	0	0	0	40	48	59	0	0	0	40	48	59	0	0	0	40	48	59	28.1	28.1	28.1	263.83	2426	2426	0	323.31	0	0	0	19.5	21.6	26.5	2440700000	0	0	0	549590000	661760000
P07910;A0A0G2JNQ3;B2RXH8;Q86SE5	P07910	23;7;7;1	23;7;7;1	16;0;0;1	Heterogeneous nuclear ribonucleoproteins C1/C2	HNRNPC	sp|P07910|HNRPC_HUMAN Heterogeneous nuclear ribonucleoproteins C1/C2 OS=Homo sapiens OX=9606 GN=HNRNPC PE=1 SV=4	4	23	23	16	5	5	4	22	18	21	5	5	4	22	18	21	3	3	4	15	11	14	51.6	51.6	44.4	33.67	306	306;293;293;291	0	323.31	16.7	14.1	17.6	48	47.7	51.6	2478400000	17443000	11499000	12120000	859220000	711970000
Q9BUQ8	Q9BUQ8	64	64	64	Probable ATP-dependent RNA helicase DDX23	DDX23	sp|Q9BUQ8|DDX23_HUMAN Probable ATP-dependent RNA helicase DDX23 OS=Homo sapiens OX=9606 GN=DDX23 PE=1 SV=3	1	64	64	64	0	0	0	46	52	53	0	0	0	46	52	53	0	0	0	46	52	53	60.7	60.7	60.7	95.581	820	820	0	323.31	0	0	0	49.3	56.5	52	2400000000	0	0	0	579330000	939580000
P63261	P63261	36	36	2	Actin, cytoplasmic 2;Actin, cytoplasmic 2, N-terminally processed	ACTG1	sp|P63261|ACTG_HUMAN Actin, cytoplasmic 2 OS=Homo sapiens OX=9606 GN=ACTG1 PE=1 SV=1	1	36	36	2	26	24	19	25	30	19	26	24	19	25	30	19	2	2	2	2	2	2	77.1	77.1	7.2	41.792	375	375	0	323.31	70.4	71.7	66.1	72	73.1	65.3	5010000000	1226700000	944410000	458460000	610770000	1243400000
Q13123	Q13123	35	35	35	Protein Red	IK	sp|Q13123|RED_HUMAN Protein Red OS=Homo sapiens OX=9606 GN=IK PE=1 SV=3	1	35	35	35	0	0	0	25	28	30	0	0	0	25	28	30	0	0	0	25	28	30	54.2	54.2	54.2	65.601	557	557	0	323.31	0	0	0	46.7	51.7	51.2	2372900000	0	0	0	679780000	698040000
O43290	O43290	60	60	60	U4/U6.U5 tri-snRNP-associated protein 1	SART1	sp|O43290|SNUT1_HUMAN U4/U6.U5 tri-snRNP-associated protein 1 OS=Homo sapiens OX=9606 GN=SART1 PE=1 SV=1	1	60	60	60	0	0	0	48	46	50	0	0	0	48	46	50	0	0	0	48	46	50	64	64	64	90.254	800	800	0	323.31	0	0	0	53.6	51.4	57.1	2345200000	0	0	0	640960000	679760000
Q07955	Q07955	40	40	39	Serine/arginine-rich splicing factor 1	SRSF1	sp|Q07955|SRSF1_HUMAN Serine/arginine-rich splicing factor 1 OS=Homo sapiens OX=9606 GN=SRSF1 PE=1 SV=2	1	40	40	39	0	0	0	31	40	27	0	0	0	31	40	27	0	0	0	30	39	26	74.2	74.2	74.2	27.744	248	248	0	323.31	0	0	0	74.2	74.2	74.2	2309500000	0	0	0	486920000	1470900000
Q9UMS4	Q9UMS4	34	34	34	Pre-mRNA-processing factor 19	PRPF19	sp|Q9UMS4|PRP19_HUMAN Pre-mRNA-processing factor 19 OS=Homo sapiens OX=9606 GN=PRPF19 PE=1 SV=1	1	34	34	34	0	0	0	26	28	28	0	0	0	26	28	28	0	0	0	26	28	28	73.8	73.8	73.8	55.18	504	504	0	323.31	0	0	0	58.5	69	73.4	2264600000	0	0	0	597910000	904640000
Q13523	Q13523	51	51	51	Serine/threonine-protein kinase PRP4 homolog	PRPF4B	sp|Q13523|PRP4B_HUMAN Serine/threonine-protein kinase PRP4 homolog OS=Homo sapiens OX=9606 GN=PRPF4B PE=1 SV=3	1	51	51	51	0	0	0	38	42	41	0	0	0	38	42	41	0	0	0	38	42	41	41.3	41.3	41.3	116.99	1007	1007	0	323.31	0	0	0	39.1	38	36.6	2231900000	0	0	0	513480000	734110000
P49756	P49756	46	46	46	RNA-binding protein 25	RBM25	sp|P49756|RBM25_HUMAN RNA-binding protein 25 OS=Homo sapiens OX=9606 GN=RBM25 PE=1 SV=3	1	46	46	46	0	0	0	32	41	37	0	0	0	32	41	37	0	0	0	32	41	37	40.8	40.8	40.8	100.18	843	843	0	323.31	0	0	0	34.2	40.3	35	2212000000	0	0	0	502610000	894770000
P17844	P17844	60	42	42	Probable ATP-dependent RNA helicase DDX5	DDX5	sp|P17844|DDX5_HUMAN Probable ATP-dependent RNA helicase DDX5 OS=Homo sapiens OX=9606 GN=DDX5 PE=1 SV=1	1	60	42	42	2	1	1	49	55	49	1	1	1	33	38	36	1	1	1	33	38	36	64.7	53.4	53.4	69.147	614	614	0	323.31	4.2	2.3	2	62.4	64	53.9	2131800000	1199000	700940	0	534110000	868710000
P14618;P30613	P14618	45;1	45;1	45;1	Pyruvate kinase PKM	PKM	sp|P14618|KPYM_HUMAN Pyruvate kinase PKM OS=Homo sapiens OX=9606 GN=PKM PE=1 SV=4	2	45	45	45	8	7	6	25	35	35	8	7	6	25	35	35	8	7	6	25	35	35	79.7	79.7	79.7	57.936	531	531;574	0	323.31	26.4	25.2	18.6	69.9	75.1	71	2222900000	79121000	41395000	48748000	513140000	785410000
Q14498;Q86U06	Q14498	33;2	33;2	33;2	RNA-binding protein 39	RBM39	sp|Q14498|RBM39_HUMAN RNA-binding protein 39 OS=Homo sapiens OX=9606 GN=RBM39 PE=1 SV=2	2	33	33	33	2	1	1	25	26	29	2	1	1	25	26	29	2	1	1	25	26	29	57.2	57.2	57.2	59.379	530	530;439	0	323.31	5.3	3.2	3.2	47.5	55.8	55.5	2045400000	1960100	1185800	496860	637540000	804030000
P61978	P61978	34	34	34	Heterogeneous nuclear ribonucleoprotein K	HNRNPK	sp|P61978|HNRPK_HUMAN Heterogeneous nuclear ribonucleoprotein K OS=Homo sapiens OX=9606 GN=HNRNPK PE=1 SV=1	1	34	34	34	1	1	1	26	29	28	1	1	1	26	29	28	1	1	1	26	29	28	67	67	67	50.976	463	463	0	323.31	3.5	3.5	4.3	56.4	62.2	60.7	1982400000	0	0	0	494740000	740140000
P11142;P54652	P11142	44;11	44;11	39;6	Heat shock cognate 71 kDa protein	HSPA8	sp|P11142|HSP7C_HUMAN Heat shock cognate 71 kDa protein OS=Homo sapiens OX=9606 GN=HSPA8 PE=1 SV=1	2	44	44	39	8	4	3	32	35	39	8	4	3	32	35	39	6	3	3	28	30	35	52.5	52.5	51.4	70.897	646	646;639	0	323.31	16.6	11.9	9.4	39	46.3	45.4	2163100000	122720000	76379000	26033000	503250000	658140000
Q13247	Q13247	22	22	18	Serine/arginine-rich splicing factor 6	SRSF6	sp|Q13247|SRSF6_HUMAN Serine/arginine-rich splicing factor 6 OS=Homo sapiens OX=9606 GN=SRSF6 PE=1 SV=2	1	22	22	18	0	0	0	17	18	11	0	0	0	17	18	11	0	0	0	14	15	9	41	41	34.9	39.586	344	344	0	185.72	0	0	0	34.6	39.2	30.8	1737200000	0	0	0	587760000	788690000
P38159;Q96E39;O75526;Q8N7X1	P38159;Q96E39	38;23;5;1	38;23;5;1	38;23;5;1	RNA-binding motif protein, X chromosome;RNA-binding motif protein, X chromosome, N-terminally processed;RNA binding motif protein, X-linked-like-1	RBMX;RBMXL1	sp|P38159|RBMX_HUMAN RNA-binding motif protein, X chromosome OS=Homo sapiens OX=9606 GN=RBMX PE=1 SV=3;sp|Q96E39|RMXL1_HUMAN RNA binding motif protein, X-linked-like-1 OS=Homo sapiens OX=9606 GN=RBMXL1 PE=1 SV=1	4	38	38	38	0	0	0	29	33	27	0	0	0	29	33	27	0	0	0	29	33	27	69.8	69.8	69.8	42.331	391	391;390;392;1067	0	287.18	0	0	0	59.8	68.3	59.8	1714000000	0	0	0	520750000	672930000
Q00839	Q00839	37	37	37	Heterogeneous nuclear ribonucleoprotein U	HNRNPU	sp|Q00839|HNRPU_HUMAN Heterogeneous nuclear ribonucleoprotein U OS=Homo sapiens OX=9606 GN=HNRNPU PE=1 SV=6	1	37	37	37	5	2	3	22	28	26	5	2	3	22	28	26	5	2	3	22	28	26	45.5	45.5	45.5	90.583	825	825	0	319.61	11	4.1	8	33.9	34.3	35.6	1644800000	13635000	6013700	8005300	487650000	556060000
O95232	O95232	30	30	30	Luc7-like protein 3	LUC7L3	sp|O95232|LC7L3_HUMAN Luc7-like protein 3 OS=Homo sapiens OX=9606 GN=LUC7L3 PE=1 SV=2	1	30	30	30	0	0	0	22	24	27	0	0	0	22	24	27	0	0	0	22	24	27	43.8	43.8	43.8	51.466	432	432	0	318.88	0	0	0	34	38.2	43.8	1592100000	0	0	0	368980000	495190000
O75533	O75533	58	58	58	Splicing factor 3B subunit 1	SF3B1	sp|O75533|SF3B1_HUMAN Splicing factor 3B subunit 1 OS=Homo sapiens OX=9606 GN=SF3B1 PE=1 SV=3	1	58	58	58	0	0	0	38	48	44	0	0	0	38	48	44	0	0	0	38	48	44	48.3	48.3	48.3	145.83	1304	1304	0	323.31	0	0	0	36.7	42.6	42.2	1575200000	0	0	0	428560000	500660000
Q96DI7	Q96DI7	28	28	28	U5 small nuclear ribonucleoprotein 40 kDa protein	SNRNP40	sp|Q96DI7|SNR40_HUMAN U5 small nuclear ribonucleoprotein 40 kDa protein OS=Homo sapiens OX=9606 GN=SNRNP40 PE=1 SV=1	1	28	28	28	0	0	0	20	27	21	0	0	0	20	27	21	0	0	0	20	27	21	72.3	72.3	72.3	39.31	357	357	0	323.31	0	0	0	56	72.3	62.2	1500300000	0	0	0	390630000	587160000
O75494	O75494	19	19	16	Serine/arginine-rich splicing factor 10	SRSF10	sp|O75494|SRS10_HUMAN Serine/arginine-rich splicing factor 10 OS=Homo sapiens OX=9606 GN=SRSF10 PE=1 SV=1	1	19	19	16	0	0	0	17	18	14	0	0	0	17	18	14	0	0	0	14	15	11	43.9	43.9	43.9	31.3	262	262	0	195.97	0	0	0	43.9	43.1	41.6	1483200000	0	0	0	399030000	852580000
O00422	O00422	22	22	22	Histone deacetylase complex subunit SAP18	SAP18	sp|O00422|SAP18_HUMAN Histone deacetylase complex subunit SAP18 OS=Homo sapiens OX=9606 GN=SAP18 PE=1 SV=1	1	22	22	22	0	0	0	18	20	16	0	0	0	18	20	16	0	0	0	18	20	16	85	85	85	17.561	153	153	0	323.31	0	0	0	83.7	80.4	77.1	1415900000	0	0	0	450560000	566140000
O75934	O75934	26	26	26	Pre-mRNA-splicing factor SPF27	BCAS2	sp|O75934|SPF27_HUMAN Pre-mRNA-splicing factor SPF27 OS=Homo sapiens OX=9606 GN=BCAS2 PE=1 SV=1	1	26	26	26	0	0	0	18	22	23	0	0	0	18	22	23	0	0	0	18	22	23	97.3	97.3	97.3	26.131	225	225	0	323.31	0	0	0	75.6	97.3	97.3	1380500000	0	0	0	306860000	593790000
Q9Y5S9	Q9Y5S9	10	10	10	RNA-binding protein 8A	RBM8A	sp|Q9Y5S9|RBM8A_HUMAN RNA-binding protein 8A OS=Homo sapiens OX=9606 GN=RBM8A PE=1 SV=1	1	10	10	10	0	0	0	7	10	7	0	0	0	7	10	7	0	0	0	7	10	7	51.7	51.7	51.7	19.889	174	174	0	161.1	0	0	0	40.8	51.7	42	1259700000	0	0	0	364800000	408030000
O75152;A0A1B0GTU1	O75152	40;10	40;10	40;10	Zinc finger CCCH domain-containing protein 11A	ZC3H11A	sp|O75152|ZC11A_HUMAN Zinc finger CCCH domain-containing protein 11A OS=Homo sapiens OX=9606 GN=ZC3H11A PE=1 SV=3	2	40	40	40	0	0	0	34	32	32	0	0	0	34	32	32	0	0	0	34	32	32	54.1	54.1	54.1	89.13	810	810;805	0	323.31	0	0	0	53.3	50.1	52.3	1254300000	0	0	0	369670000	454880000
P36578	P36578	31	31	31	60S ribosomal protein L4	RPL4	sp|P36578|RL4_HUMAN 60S ribosomal protein L4 OS=Homo sapiens OX=9606 GN=RPL4 PE=1 SV=5	1	31	31	31	5	4	5	20	28	20	5	4	5	20	28	20	5	4	5	20	28	20	58.1	58.1	58.1	47.697	427	427	0	323.31	17.6	12.4	16.6	49.2	53.4	41.9	1295000000	12290000	14387000	14558000	368480000	490100000
Q9ULR0	Q9ULR0	28	28	28	Pre-mRNA-splicing factor ISY1 homolog	ISY1	sp|Q9ULR0|ISY1_HUMAN Pre-mRNA-splicing factor ISY1 homolog OS=Homo sapiens OX=9606 GN=ISY1 PE=1 SV=3	1	28	28	28	0	0	0	21	22	24	0	0	0	21	22	24	0	0	0	21	22	24	68.4	68.4	68.4	32.992	285	285	0	323.31	0	0	0	61.4	61.8	67.4	1229900000	0	0	0	378400000	392640000
Q13595	Q13595	27	23	23	Transformer-2 protein homolog alpha	TRA2A	sp|Q13595|TRA2A_HUMAN Transformer-2 protein homolog alpha OS=Homo sapiens OX=9606 GN=TRA2A PE=1 SV=1	1	27	23	23	0	0	0	21	25	15	0	0	0	18	21	13	0	0	0	18	21	13	66	59.6	59.6	32.688	282	282	0	214.26	0	0	0	58.9	64.5	45	1205800000	0	0	0	370720000	546990000
Q8WUD4	Q8WUD4	15	15	15	Coiled-coil domain-containing protein 12	CCDC12	sp|Q8WUD4|CCD12_HUMAN Coiled-coil domain-containing protein 12 OS=Homo sapiens OX=9606 GN=CCDC12 PE=1 SV=1	1	15	15	15	0	0	0	9	13	13	0	0	0	9	13	13	0	0	0	9	13	13	65.7	65.7	65.7	19.181	166	166	0	323.31	0	0	0	50	62.7	57.8	1184200000	0	0	0	271180000	347180000
O43660	O43660	18	18	18	Pleiotropic regulator 1	PLRG1	sp|O43660|PLRG1_HUMAN Pleiotropic regulator 1 OS=Homo sapiens OX=9606 GN=PLRG1 PE=1 SV=1	1	18	18	18	0	0	0	13	17	16	0	0	0	13	17	16	0	0	0	13	17	16	41.1	41.1	41.1	57.193	514	514	0	285.45	0	0	0	28	41.1	34.4	1144500000	0	0	0	289080000	395220000
O43395	O43395	35	35	35	U4/U6 small nuclear ribonucleoprotein Prp3	PRPF3	sp|O43395|PRPF3_HUMAN U4/U6 small nuclear ribonucleoprotein Prp3 OS=Homo sapiens OX=9606 GN=PRPF3 PE=1 SV=2	1	35	35	35	0	0	0	28	30	29	0	0	0	28	30	29	0	0	0	28	30	29	44.4	44.4	44.4	77.528	683	683	0	323.31	0	0	0	37.5	42.2	39.4	1112100000	0	0	0	297840000	369060000
Q15459	Q15459	30	30	30	Splicing factor 3A subunit 1	SF3A1	sp|Q15459|SF3A1_HUMAN Splicing factor 3A subunit 1 OS=Homo sapiens OX=9606 GN=SF3A1 PE=1 SV=1	1	30	30	30	0	0	0	25	28	28	0	0	0	25	28	28	0	0	0	25	28	28	34.8	34.8	34.8	88.885	793	793	0	323.31	0	0	0	30.5	33	32.3	1079200000	0	0	0	286200000	362910000
O00571;O15523;Q9NQI0	O00571;O15523	37;23;2	36;22;2	36;22;2	ATP-dependent RNA helicase DDX3X;ATP-dependent RNA helicase DDX3Y	DDX3X;DDX3Y	sp|O00571|DDX3X_HUMAN ATP-dependent RNA helicase DDX3X OS=Homo sapiens OX=9606 GN=DDX3X PE=1 SV=3;sp|O15523|DDX3Y_HUMAN ATP-dependent RNA helicase DDX3Y OS=Homo sapiens OX=9606 GN=DDX3Y PE=1 SV=2	3	37	36	36	1	0	0	25	31	25	1	0	0	24	30	24	1	0	0	24	30	24	46.7	46.7	46.7	73.243	662	662;660;724	0	323.31	2.1	0	0	38.5	42.9	35.2	1065100000	565360	0	0	316150000	446800000
Q14562	Q14562	41	41	40	ATP-dependent RNA helicase DHX8	DHX8	sp|Q14562|DHX8_HUMAN ATP-dependent RNA helicase DHX8 OS=Homo sapiens OX=9606 GN=DHX8 PE=1 SV=1	1	41	41	40	0	0	0	24	35	29	0	0	0	24	35	29	0	0	0	24	34	28	30.9	30.9	30.2	139.31	1220	1220	0	323.31	0	0	0	19.8	29.2	23.7	1054800000	0	0	0	235900000	403800000
Q9P013	Q9P013	22	22	22	Spliceosome-associated protein CWC15 homolog	CWC15	sp|Q9P013|CWC15_HUMAN Spliceosome-associated protein CWC15 homolog OS=Homo sapiens OX=9606 GN=CWC15 PE=1 SV=2	1	22	22	22	0	0	0	17	14	18	0	0	0	17	14	18	0	0	0	17	14	18	50.7	50.7	50.7	26.624	229	229	0	323.31	0	0	0	47.6	40.6	50.2	1052700000	0	0	0	386760000	259900000
Q13242	Q13242	27	26	26	Serine/arginine-rich splicing factor 9	SRSF9	sp|Q13242|SRSF9_HUMAN Serine/arginine-rich splicing factor 9 OS=Homo sapiens OX=9606 GN=SRSF9 PE=1 SV=1	1	27	26	26	0	0	0	19	20	19	0	0	0	18	19	18	0	0	0	18	19	18	84.2	84.2	84.2	25.542	221	221	0	128.34	0	0	0	68.8	74.2	70.6	1047900000	0	0	0	369180000	371810000
O60508	O60508	21	21	21	Pre-mRNA-processing factor 17	CDC40	sp|O60508|PRP17_HUMAN Pre-mRNA-processing factor 17 OS=Homo sapiens OX=9606 GN=CDC40 PE=1 SV=1	1	21	21	21	0	0	0	14	19	15	0	0	0	14	19	15	0	0	0	14	19	15	51.3	51.3	51.3	65.521	579	579	0	280.83	0	0	0	41.1	48.9	43.4	1001900000	0	0	0	272170000	443880000
P08621	P08621	35	35	35	U1 small nuclear ribonucleoprotein 70 kDa	SNRNP70	sp|P08621|RU17_HUMAN U1 small nuclear ribonucleoprotein 70 kDa OS=Homo sapiens OX=9606 GN=SNRNP70 PE=1 SV=2	1	35	35	35	0	0	0	27	28	24	0	0	0	27	28	24	0	0	0	27	28	24	52.2	52.2	52.2	51.556	437	437	0	171.7	0	0	0	39.6	42.6	48.7	1001200000	0	0	0	321260000	367830000
Q9NW64	Q9NW64	18	18	18	Pre-mRNA-splicing factor RBM22	RBM22	sp|Q9NW64|RBM22_HUMAN Pre-mRNA-splicing factor RBM22 OS=Homo sapiens OX=9606 GN=RBM22 PE=1 SV=1	1	18	18	18	0	0	0	14	15	12	0	0	0	14	15	12	0	0	0	14	15	12	45.2	45.2	45.2	46.895	420	420	0	323.31	0	0	0	41	40.5	36.4	981030000	0	0	0	240060000	393760000
P31943	P31943	25	25	16	Heterogeneous nuclear ribonucleoprotein H;Heterogeneous nuclear ribonucleoprotein H, N-terminally processed	HNRNPH1	sp|P31943|HNRH1_HUMAN Heterogeneous nuclear ribonucleoprotein H OS=Homo sapiens OX=9606 GN=HNRNPH1 PE=1 SV=4	1	25	25	16	1	1	1	18	23	19	1	1	1	18	23	19	0	0	0	12	15	12	48.8	48.8	32.3	49.229	449	449	0	291.67	3.8	3.8	3.8	41.2	47.9	42.1	982330000	638920	696410	657710	233490000	368990000
P68363;A6NHL2;Q9H853	P68363	26;4;1	26;4;1	0;0;0	Tubulin alpha-1B chain	TUBA1B	sp|P68363|TBA1B_HUMAN Tubulin alpha-1B chain OS=Homo sapiens OX=9606 GN=TUBA1B PE=1 SV=1	3	26	26	0	17	11	13	15	19	17	17	11	13	15	19	17	0	0	0	0	0	0	69.4	69.4	0	50.151	451	451;446;241	0	323.31	51.2	33.9	44.8	35	45.9	45.9	1450500000	199280000	133600000	138750000	244790000	417220000
P68104;Q5VTE0	P68104;Q5VTE0	20;19	20;19	9;9	Elongation factor 1-alpha 1;Putative elongation factor 1-alpha-like 3	EEF1A1;EEF1A1P5	sp|P68104|EF1A1_HUMAN Elongation factor 1-alpha 1 OS=Homo sapiens OX=9606 GN=EEF1A1 PE=1 SV=1;sp|Q5VTE0|EF1A3_HUMAN Putative elongation factor 1-alpha-like 3 OS=Homo sapiens OX=9606 GN=EEF1A1P5 PE=5 SV=1	2	20	20	9	12	7	9	13	13	13	12	7	9	13	13	13	5	3	3	5	5	4	54.1	54.1	32.7	50.14	462	462;462	0	190.83	46.5	22.1	28.8	36.1	37	38.1	1350400000	168430000	97563000	126150000	251110000	383200000
Q6UN15	Q6UN15	20	20	20	Pre-mRNA 3-end-processing factor FIP1	FIP1L1	sp|Q6UN15|FIP1_HUMAN Pre-mRNA 3-end-processing factor FIP1 OS=Homo sapiens OX=9606 GN=FIP1L1 PE=1 SV=1	1	20	20	20	1	0	0	15	17	15	1	0	0	15	17	15	1	0	0	15	17	15	41.4	41.4	41.4	66.526	594	594	0	278.87	3.2	0	0	37.7	33.5	33	940150000	0	0	0	260710000	290030000
Q53GS9	Q53GS9	18	18	18	U4/U6.U5 tri-snRNP-associated protein 2	USP39	sp|Q53GS9|SNUT2_HUMAN U4/U6.U5 tri-snRNP-associated protein 2 OS=Homo sapiens OX=9606 GN=USP39 PE=1 SV=2	1	18	18	18	0	0	0	12	17	17	0	0	0	12	17	17	0	0	0	12	17	17	32.9	32.9	32.9	65.38	565	565	0	323.31	0	0	0	23.2	32.9	31.2	919450000	0	0	0	240560000	325270000
Q86V81	Q86V81	10	10	10	THO complex subunit 4	ALYREF	sp|Q86V81|THOC4_HUMAN THO complex subunit 4 OS=Homo sapiens OX=9606 GN=ALYREF PE=1 SV=3	1	10	10	10	0	0	0	9	9	9	0	0	0	9	9	9	0	0	0	9	9	9	44	44	44	26.888	257	257	0	323.31	0	0	0	34.2	34.2	33.9	914360000	0	0	0	303870000	267140000
O43143	O43143	34	33	33	Pre-mRNA-splicing factor ATP-dependent RNA helicase DHX15	DHX15	sp|O43143|DHX15_HUMAN Pre-mRNA-splicing factor ATP-dependent RNA helicase DHX15 OS=Homo sapiens OX=9606 GN=DHX15 PE=1 SV=2	1	34	33	33	0	0	0	20	32	22	0	0	0	20	31	21	0	0	0	20	31	21	35.1	34	34	90.932	795	795	0	323.31	0	0	0	26.9	31.4	26.2	889020000	0	0	0	203220000	396400000
P55081	P55081	25	25	25	Microfibrillar-associated protein 1	MFAP1	sp|P55081|MFAP1_HUMAN Microfibrillar-associated protein 1 OS=Homo sapiens OX=9606 GN=MFAP1 PE=1 SV=2	1	25	25	25	0	0	0	17	19	22	0	0	0	17	19	22	0	0	0	17	19	22	52.8	52.8	52.8	51.958	439	439	0	323.31	0	0	0	39.2	46.5	52.2	870470000	0	0	0	259930000	298760000
Q9UJV9	Q9UJV9	35	35	35	Probable ATP-dependent RNA helicase DDX41	DDX41	sp|Q9UJV9|DDX41_HUMAN Probable ATP-dependent RNA helicase DDX41 OS=Homo sapiens OX=9606 GN=DDX41 PE=1 SV=2	1	35	35	35	0	0	0	20	29	27	0	0	0	20	29	27	0	0	0	20	29	27	62.4	62.4	62.4	69.837	622	622	0	170.63	0	0	0	33.9	56.8	52.6	856270000	0	0	0	199740000	312180000
P62263	P62263	11	11	11	40S ribosomal protein S14	RPS14	sp|P62263|RS14_HUMAN 40S ribosomal protein S14 OS=Homo sapiens OX=9606 GN=RPS14 PE=1 SV=3	1	11	11	11	3	1	2	10	10	11	3	1	2	10	10	11	3	1	2	10	10	11	45.7	45.7	45.7	16.273	151	151	0	80.557	26.5	8.6	15.2	45.7	43	45.7	862970000	3971800	0	4169900	248820000	306090000
P0DN76;Q01081;Q8WU68	P0DN76;Q01081	11;11;2	11;11;2	11;11;2	Splicing factor U2AF 35 kDa subunit	U2AF1	sp|P0DN76|U2AF5_HUMAN Splicing factor U2AF 35 kDa subunit-like protein OS=Homo sapiens OX=9606 GN=U2AF1L5 PE=1 SV=1;sp|Q01081|U2AF1_HUMAN Splicing factor U2AF 35 kDa subunit OS=Homo sapiens OX=9606 GN=U2AF1 PE=1 SV=3	3	11	11	11	0	0	0	9	8	9	0	0	0	9	8	9	0	0	0	9	8	9	45.4	45.4	45.4	27.872	240	240;240;220	0	166.27	0	0	0	41.7	36.2	35.4	850160000	0	0	0	633220000	117240000
Q8TAD8	Q8TAD8	22	22	22	Smad nuclear-interacting protein 1	SNIP1	sp|Q8TAD8|SNIP1_HUMAN Smad nuclear-interacting protein 1 OS=Homo sapiens OX=9606 GN=SNIP1 PE=1 SV=1	1	22	22	22	0	0	0	19	18	21	0	0	0	19	18	21	0	0	0	19	18	21	50.5	50.5	50.5	45.777	396	396	0	168.41	0	0	0	45.5	50.3	49.2	849520000	0	0	0	239040000	232810000
P26368	P26368	19	19	19	Splicing factor U2AF 65 kDa subunit	U2AF2	sp|P26368|U2AF2_HUMAN Splicing factor U2AF 65 kDa subunit OS=Homo sapiens OX=9606 GN=U2AF2 PE=1 SV=4	1	19	19	19	1	0	0	10	16	13	1	0	0	10	16	13	1	0	0	10	16	13	40	40	40	53.5	475	475	0	234.1	3.8	0	0	23.2	33.3	29.9	807990000	1221400	0	0	152950000	304370000
P68371	P68371	36	36	2	Tubulin beta-4B chain	TUBB4B	sp|P68371|TBB4B_HUMAN Tubulin beta-4B chain OS=Homo sapiens OX=9606 GN=TUBB4B PE=1 SV=1	1	36	36	2	28	20	24	19	27	21	28	20	24	19	27	21	1	1	2	1	1	1	78.2	78.2	3.6	49.83	445	445	0	323.31	68.5	60.2	71.5	49.4	68.8	60.9	1458300000	312840000	175310000	165490000	219810000	337020000
Q12874	Q12874	26	26	26	Splicing factor 3A subunit 3	SF3A3	sp|Q12874|SF3A3_HUMAN Splicing factor 3A subunit 3 OS=Homo sapiens OX=9606 GN=SF3A3 PE=1 SV=1	1	26	26	26	0	0	0	16	19	20	0	0	0	16	19	20	0	0	0	16	19	20	50.9	50.9	50.9	58.848	501	501	0	323.31	0	0	0	35.9	43.7	42.9	803080000	0	0	0	176000000	318910000
Q16777;Q6FI13;Q99878;Q96KK5;Q9BTM1;P20671;P0C0S8	Q16777;Q6FI13;Q99878;Q96KK5;Q9BTM1;P20671;P0C0S8	6;6;5;5;5;5;5	6;6;5;5;5;5;5	2;2;1;1;1;1;1	Histone H2A type 2-C;Histone H2A type 2-A;Histone H2A type 1-J;Histone H2A type 1-H;Histone H2A.J;Histone H2A type 1-D;Histone H2A type 1	HIST2H2AC;HIST2H2AA3;HIST1H2AJ;HIST1H2AH;H2AFJ;HIST1H2AD;HIST1H2AG	sp|Q16777|H2A2C_HUMAN Histone H2A type 2-C OS=Homo sapiens OX=9606 GN=HIST2H2AC PE=1 SV=4;sp|Q6FI13|H2A2A_HUMAN Histone H2A type 2-A OS=Homo sapiens OX=9606 GN=HIST2H2AA4 PE=1 SV=3;sp|Q99878|H2A1J_HUMAN Histone H2A type 1-J OS=Homo sapiens OX=9606 GN=HIST1	7	6	6	2	2	4	2	5	5	4	2	4	2	5	5	4	0	1	1	1	2	1	63.6	63.6	39.5	13.988	129	129;130;128;128;129;130;130	0	323.31	25.6	58.1	40.3	60.5	61.2	58.1	927170000	37318000	71936000	52021000	129880000	438680000
P62829	P62829	10	10	10	60S ribosomal protein L23	RPL23	sp|P62829|RL23_HUMAN 60S ribosomal protein L23 OS=Homo sapiens OX=9606 GN=RPL23 PE=1 SV=1	1	10	10	10	4	6	4	8	9	10	4	6	4	8	9	10	4	6	4	8	9	10	54.3	54.3	54.3	14.865	140	140	0	155.73	33.6	47.1	45.7	47.9	47.9	54.3	824180000	17928000	25388000	22774000	232790000	302140000
Q9BXP5	Q9BXP5	30	30	30	Serrate RNA effector molecule homolog	SRRT	sp|Q9BXP5|SRRT_HUMAN Serrate RNA effector molecule homolog OS=Homo sapiens OX=9606 GN=SRRT PE=1 SV=1	1	30	30	30	0	0	0	23	23	22	0	0	0	23	23	22	0	0	0	23	23	22	33.6	33.6	33.6	100.67	876	876	0	254.28	0	0	0	29	29.9	26.4	755720000	0	0	0	266390000	234180000
P11021	P11021	30	29	29	78 kDa glucose-regulated protein	HSPA5	sp|P11021|BIP_HUMAN Endoplasmic reticulum chaperone BiP OS=Homo sapiens OX=9606 GN=HSPA5 PE=1 SV=2	1	30	29	29	4	3	3	23	25	25	3	2	3	22	24	24	3	2	3	22	24	24	39	39	39	72.332	654	654	0	296.93	10.9	8.7	8.1	31.2	34.3	33	782230000	14862000	9507300	11449000	182800000	212470000
Q02040	Q02040	20	20	20	A-kinase anchor protein 17A	AKAP17A	sp|Q02040|AK17A_HUMAN A-kinase anchor protein 17A OS=Homo sapiens OX=9606 GN=AKAP17A PE=1 SV=2	1	20	20	20	0	0	0	12	14	15	0	0	0	12	14	15	0	0	0	12	14	15	36.8	36.8	36.8	80.735	695	695	0	323.31	0	0	0	22.3	28.6	30.2	746120000	0	0	0	171960000	296360000
Q02878	Q02878	12	12	12	60S ribosomal protein L6	RPL6	sp|Q02878|RL6_HUMAN 60S ribosomal protein L6 OS=Homo sapiens OX=9606 GN=RPL6 PE=1 SV=3	1	12	12	12	2	2	2	9	10	10	2	2	2	9	10	10	2	2	2	9	10	10	41	41	41	32.728	288	288	0	106.69	7.6	10.4	10.1	28.1	38.2	33.7	753870000	1110800	8437000	3540700	244940000	306910000
P14866	P14866	27	27	27	Heterogeneous nuclear ribonucleoprotein L	HNRNPL	sp|P14866|HNRPL_HUMAN Heterogeneous nuclear ribonucleoprotein L OS=Homo sapiens OX=9606 GN=HNRNPL PE=1 SV=2	1	27	27	27	1	0	0	17	22	17	1	0	0	17	22	17	1	0	0	17	22	17	53.7	53.7	53.7	64.132	589	589	0	323.31	5.8	0	0	44.8	46.2	40.9	755900000	17508000	0	0	189630000	334030000
P61326	P61326	16	16	2	Protein mago nashi homolog	MAGOH	sp|P61326|MGN_HUMAN Protein mago nashi homolog OS=Homo sapiens OX=9606 GN=MAGOH PE=1 SV=1	1	16	16	2	0	0	0	13	13	11	0	0	0	13	13	11	0	0	0	2	1	1	93.2	93.2	9.6	17.163	146	146	0	132.5	0	0	0	76.7	80.8	61.6	737690000	0	0	0	171600000	391140000
P30050	P30050	9	9	9	60S ribosomal protein L12	RPL12	sp|P30050|RL12_HUMAN 60S ribosomal protein L12 OS=Homo sapiens OX=9606 GN=RPL12 PE=1 SV=1	1	9	9	9	1	2	2	7	8	9	1	2	2	7	8	9	1	2	2	7	8	9	60.6	60.6	60.6	17.818	165	165	0	239.96	9.7	35.2	14.5	55.2	60.6	60.6	748240000	1066300	10676000	0	172410000	211360000
P62805	P62805	7	7	7	Histone H4	HIST1H4A	sp|P62805|H4_HUMAN Histone H4 OS=Homo sapiens OX=9606 GN=HIST4H4 PE=1 SV=2	1	7	7	7	3	2	2	4	5	7	3	2	2	4	5	7	3	2	2	4	5	7	63.1	63.1	63.1	11.367	103	103	0	63.738	43.7	29.1	24.3	56.3	56.3	63.1	1438800000	322280000	135400000	245080000	287460000	252940000
Q9HCS7	Q9HCS7	36	36	36	Pre-mRNA-splicing factor SYF1	XAB2	sp|Q9HCS7|SYF1_HUMAN Pre-mRNA-splicing factor SYF1 OS=Homo sapiens OX=9606 GN=XAB2 PE=1 SV=2	1	36	36	36	0	0	0	24	34	23	0	0	0	24	34	23	0	0	0	24	34	23	47.5	47.5	47.5	100.01	855	855	0	323.31	0	0	0	35.3	46.1	36.4	723110000	0	0	0	150650000	339640000
Q9BRR8	Q9BRR8	36	36	36	G patch domain-containing protein 1	GPATCH1	sp|Q9BRR8|GPTC1_HUMAN G patch domain-containing protein 1 OS=Homo sapiens OX=9606 GN=GPATCH1 PE=1 SV=1	1	36	36	36	0	0	0	26	27	29	0	0	0	26	27	29	0	0	0	26	27	29	45.3	45.3	45.3	103.34	931	931	0	282.14	0	0	0	34.2	40.5	38.2	709950000	0	0	0	218400000	220020000
P98175	P98175	32	32	28	RNA-binding protein 10	RBM10	sp|P98175|RBM10_HUMAN RNA-binding protein 10 OS=Homo sapiens OX=9606 GN=RBM10 PE=1 SV=3	1	32	32	28	0	0	0	23	22	28	0	0	0	23	22	28	0	0	0	21	20	24	38.7	38.7	35.5	103.53	930	930	0	257.89	0	0	0	31	31.3	36.3	696000000	0	0	0	151970000	188360000
Q7RTV0	Q7RTV0	10	10	10	PHD finger-like domain-containing protein 5A	PHF5A	sp|Q7RTV0|PHF5A_HUMAN PHD finger-like domain-containing protein 5A OS=Homo sapiens OX=9606 GN=PHF5A PE=1 SV=1	1	10	10	10	0	0	0	7	9	10	0	0	0	7	9	10	0	0	0	7	9	10	70.9	70.9	70.9	12.405	110	110	0	77.709	0	0	0	70.9	70.9	70.9	692700000	0	0	0	198160000	197130000
Q2TAY7	Q2TAY7	18	18	18	WD40 repeat-containing protein SMU1;WD40 repeat-containing protein SMU1, N-terminally processed	SMU1	sp|Q2TAY7|SMU1_HUMAN WD40 repeat-containing protein SMU1 OS=Homo sapiens OX=9606 GN=SMU1 PE=1 SV=2	1	18	18	18	0	0	0	14	15	16	0	0	0	14	15	16	0	0	0	14	15	16	44.8	44.8	44.8	57.543	513	513	0	282.32	0	0	0	39	37.6	38.8	690240000	0	0	0	182180000	200230000
Q9BZJ0	Q9BZJ0	31	31	31	Crooked neck-like protein 1	CRNKL1	sp|Q9BZJ0|CRNL1_HUMAN Crooked neck-like protein 1 OS=Homo sapiens OX=9606 GN=CRNKL1 PE=1 SV=4	1	31	31	31	0	0	0	23	30	20	0	0	0	23	30	20	0	0	0	23	30	20	35.7	35.7	35.7	100.45	848	848	0	323.31	0	0	0	25.8	35.7	21.6	676020000	0	0	0	169840000	327950000
Q8N5F7;Q5M9Q1	Q8N5F7	13;4	13;4	13;4	NF-kappa-B-activating protein	NKAP	sp|Q8N5F7|NKAP_HUMAN NF-kappa-B-activating protein OS=Homo sapiens OX=9606 GN=NKAP PE=1 SV=1	2	13	13	13	0	0	0	10	9	10	0	0	0	10	9	10	0	0	0	10	9	10	34.7	34.7	34.7	47.138	415	415;402	0	178.22	0	0	0	31.3	26.5	31.1	675220000	0	0	0	197400000	222050000
P41223	P41223	16	16	16	Protein BUD31 homolog	BUD31	sp|P41223|BUD31_HUMAN Protein BUD31 homolog OS=Homo sapiens OX=9606 GN=BUD31 PE=1 SV=2	1	16	16	16	0	0	0	14	16	12	0	0	0	14	16	12	0	0	0	14	16	12	71.5	71.5	71.5	17	144	144	0	167.74	0	0	0	71.5	71.5	70.1	671730000	0	0	0	184450000	279340000
O95391	O95391	23	23	23	Pre-mRNA-splicing factor SLU7	SLU7	sp|O95391|SLU7_HUMAN Pre-mRNA-splicing factor SLU7 OS=Homo sapiens OX=9606 GN=SLU7 PE=1 SV=2	1	23	23	23	0	0	0	15	17	18	0	0	0	15	17	18	0	0	0	15	17	18	36.7	36.7	36.7	68.386	586	586	0	323.31	0	0	0	21.8	33.1	29.2	655410000	0	0	0	166510000	195960000
P62917	P62917	22	22	22	60S ribosomal protein L8	RPL8	sp|P62917|RL8_HUMAN 60S ribosomal protein L8 OS=Homo sapiens OX=9606 GN=RPL8 PE=1 SV=2	1	22	22	22	3	1	3	17	21	13	3	1	3	17	21	13	3	1	3	17	21	13	56	56	56	28.024	257	257	0	133.37	16.3	12.5	19.1	52.1	56	52.1	630840000	2855000	1452800	2843500	173000000	286940000
P43243	P43243	23	23	23	Matrin-3	MATR3	sp|P43243|MATR3_HUMAN Matrin-3 OS=Homo sapiens OX=9606 GN=MATR3 PE=1 SV=2	1	23	23	23	1	1	1	15	12	18	1	1	1	15	12	18	1	1	1	15	12	18	38.7	38.7	38.7	94.622	847	847	0	323.31	1.7	1.7	1.7	32.3	24.3	33.9	556150000	490730	534310	0	225870000	166550000
Q96QD9	Q96QD9	22	22	22	UAP56-interacting factor	FYTTD1	sp|Q96QD9|UIF_HUMAN UAP56-interacting factor OS=Homo sapiens OX=9606 GN=FYTTD1 PE=1 SV=3	1	22	22	22	0	0	0	17	19	18	0	0	0	17	19	18	0	0	0	17	19	18	65.1	65.1	65.1	35.818	318	318	0	276.39	0	0	0	59.7	60.4	50.3	541470000	0	0	0	179350000	189270000
P26373	P26373	17	17	17	60S ribosomal protein L13	RPL13	sp|P26373|RL13_HUMAN 60S ribosomal protein L13 OS=Homo sapiens OX=9606 GN=RPL13 PE=1 SV=4	1	17	17	17	4	3	3	13	16	14	4	3	3	13	16	14	4	3	3	13	16	14	53.6	53.6	53.6	24.261	211	211	0	171.93	22.7	15.2	19	50.2	53.6	51.2	556440000	7138400	5480600	6466900	148850000	219800000
Q96DF8	Q96DF8	23	23	23	Protein DGCR14	DGCR14	sp|Q96DF8|ESS2_HUMAN Splicing factor ESS-2 homolog OS=Homo sapiens OX=9606 GN=ESS2 PE=1 SV=1	1	23	23	23	0	0	0	17	19	22	0	0	0	17	19	22	0	0	0	17	19	22	56.1	56.1	56.1	52.567	476	476	0	181.11	0	0	0	45.4	55.7	56.1	531480000	0	0	0	175480000	130630000
Q15637	Q15637	20	20	20	Splicing factor 1	SF1	sp|Q15637|SF01_HUMAN Splicing factor 1 OS=Homo sapiens OX=9606 GN=SF1 PE=1 SV=4	1	20	20	20	0	0	0	13	15	17	0	0	0	13	15	17	0	0	0	13	15	17	29.4	29.4	29.4	68.329	639	639	0	323.31	0	0	0	18	22.1	27.7	528350000	0	0	0	83249000	166490000
Q9BWJ5	Q9BWJ5	6	6	6	Splicing factor 3B subunit 5	SF3B5	sp|Q9BWJ5|SF3B5_HUMAN Splicing factor 3B subunit 5 OS=Homo sapiens OX=9606 GN=SF3B5 PE=1 SV=1	1	6	6	6	0	0	0	4	4	6	0	0	0	4	4	6	0	0	0	4	4	6	68.6	68.6	68.6	10.135	86	86	0	110.66	0	0	0	45.3	68.6	68.6	516510000	0	0	0	147220000	174670000
Q86VM9	Q86VM9	25	25	25	Zinc finger CCCH domain-containing protein 18	ZC3H18	sp|Q86VM9|ZCH18_HUMAN Zinc finger CCCH domain-containing protein 18 OS=Homo sapiens OX=9606 GN=ZC3H18 PE=1 SV=2	1	25	25	25	0	0	0	18	21	22	0	0	0	18	21	22	0	0	0	18	21	22	33.5	33.5	33.5	106.38	953	953	0	135.09	0	0	0	25.7	27.4	27.7	516210000	0	0	0	134880000	189910000
O95400	O95400	16	16	16	CD2 antigen cytoplasmic tail-binding protein 2	CD2BP2	sp|O95400|CD2B2_HUMAN CD2 antigen cytoplasmic tail-binding protein 2 OS=Homo sapiens OX=9606 GN=CD2BP2 PE=1 SV=1	1	16	16	16	0	0	0	9	11	15	0	0	0	9	11	15	0	0	0	9	11	15	51.3	51.3	51.3	37.646	341	341	0	141.37	0	0	0	28.2	43.7	39.6	493270000	0	0	0	97320000	143240000
Q9NWH9	Q9NWH9	22	22	22	SAFB-like transcription modulator	SLTM	sp|Q9NWH9|SLTM_HUMAN SAFB-like transcription modulator OS=Homo sapiens OX=9606 GN=SLTM PE=1 SV=2	1	22	22	22	0	0	0	16	16	15	0	0	0	16	16	15	0	0	0	16	16	15	22.7	22.7	22.7	117.15	1034	1034	0	246.62	0	0	0	16.2	18	16.4	484430000	0	0	0	154190000	170750000
Q92917	Q92917	23	23	23	G patch domain and KOW motifs-containing protein	GPKOW	sp|Q92917|GPKOW_HUMAN G-patch domain and KOW motifs-containing protein OS=Homo sapiens OX=9606 GN=GPKOW PE=1 SV=2	1	23	23	23	0	0	0	14	19	19	0	0	0	14	19	19	0	0	0	14	19	19	67	67	67	52.228	476	476	0	323.31	0	0	0	47.7	62.2	63.7	466440000	0	0	0	99390000	167310000
Q15393	Q15393	35	35	35	Splicing factor 3B subunit 3	SF3B3	sp|Q15393|SF3B3_HUMAN Splicing factor 3B subunit 3 OS=Homo sapiens OX=9606 GN=SF3B3 PE=1 SV=4	1	35	35	35	0	0	0	16	32	24	0	0	0	16	32	24	0	0	0	16	32	24	31.5	31.5	31.5	135.58	1217	1217	0	158.72	0	0	0	18.1	29.3	21.4	463720000	0	0	0	95438000	244870000
P62913	P62913	12	12	12	60S ribosomal protein L11	RPL11	sp|P62913|RL11_HUMAN 60S ribosomal protein L11 OS=Homo sapiens OX=9606 GN=RPL11 PE=1 SV=2	1	12	12	12	1	3	3	8	10	11	1	3	3	8	10	11	1	3	3	8	10	11	51.7	51.7	51.7	20.252	178	178	0	263.02	7.9	18.5	25.3	35.4	45.5	51.7	484740000	6668500	6866200	10311000	113680000	183640000
P62753	P62753	15	15	15	40S ribosomal protein S6	RPS6	sp|P62753|RS6_HUMAN 40S ribosomal protein S6 OS=Homo sapiens OX=9606 GN=RPS6 PE=1 SV=1	1	15	15	15	2	2	2	10	11	11	2	2	2	10	11	11	2	2	2	10	11	11	43.4	43.4	43.4	28.68	249	249	0	132.12	12.9	11.2	11.2	28.9	35.3	33.7	451400000	3390700	1446800	883640	114940000	202180000
P16403	P16403	12	12	3	Histone H1.2	HIST1H1C	sp|P16403|H12_HUMAN Histone H1.2 OS=Homo sapiens OX=9606 GN=HIST1H1C PE=1 SV=2	1	12	12	3	5	8	6	8	11	10	5	8	6	8	11	10	1	2	1	2	2	1	39	39	9.9	21.364	213	213	0	90.946	32.9	33.3	32.4	33.3	39	39	509740000	19689000	40845000	14527000	127090000	153470000
P04406	P04406	10	10	10	Glyceraldehyde-3-phosphate dehydrogenase	GAPDH	sp|P04406|G3P_HUMAN Glyceraldehyde-3-phosphate dehydrogenase OS=Homo sapiens OX=9606 GN=GAPDH PE=1 SV=3	1	10	10	10	9	6	5	6	7	5	9	6	5	6	7	5	9	6	5	6	7	5	60.3	60.3	60.3	36.053	335	335	0	323.31	60.3	38.5	38.5	33.4	38.5	31.6	1317300000	438440000	297800000	147500000	109320000	165080000
P07437;A6NNZ2;Q9H4B7	P07437	34;8;4	8;0;0	6;0;0	Tubulin beta chain	TUBB	sp|P07437|TBB5_HUMAN Tubulin beta chain OS=Homo sapiens OX=9606 GN=TUBB PE=1 SV=2	3	34	8	6	30	23	23	18	25	21	7	6	5	4	5	6	5	4	4	3	4	5	74.1	28.4	19.1	49.67	444	444;444;451	0	195.03	73.9	66.7	65.8	48.6	58.6	62.8	737030000	148060000	85528000	72379000	113530000	193460000
Q9Y5B6	Q9Y5B6	27	27	27	PAX3- and PAX7-binding protein 1	PAXBP1	sp|Q9Y5B6|PAXB1_HUMAN PAX3- and PAX7-binding protein 1 OS=Homo sapiens OX=9606 GN=PAXBP1 PE=1 SV=2	1	27	27	27	0	0	0	18	21	20	0	0	0	18	21	20	0	0	0	18	21	20	35.6	35.6	35.6	104.8	917	917	0	273.16	0	0	0	27.3	28.8	31.1	427020000	0	0	0	111340000	151910000
P62241	P62241	14	14	14	40S ribosomal protein S8	RPS8	sp|P62241|RS8_HUMAN 40S ribosomal protein S8 OS=Homo sapiens OX=9606 GN=RPS8 PE=1 SV=2	1	14	14	14	3	3	3	10	13	8	3	3	3	10	13	8	3	3	3	10	13	8	62.5	62.5	62.5	24.205	208	208	0	323.31	20.7	20.7	21.2	61.5	61.1	48.6	445970000	11175000	10671000	11334000	118970000	217070000
P62280	P62280	13	13	13	40S ribosomal protein S11	RPS11	sp|P62280|RS11_HUMAN 40S ribosomal protein S11 OS=Homo sapiens OX=9606 GN=RPS11 PE=1 SV=3	1	13	13	13	2	2	3	10	10	9	2	2	3	10	10	9	2	2	3	10	10	9	63.3	63.3	63.3	18.431	158	158	0	119.88	15.8	15.8	22.2	55.1	59.5	51.9	421760000	5522200	4943000	3949500	126260000	171740000
P61247	P61247	17	17	17	40S ribosomal protein S3a	RPS3A	sp|P61247|RS3A_HUMAN 40S ribosomal protein S3a OS=Homo sapiens OX=9606 GN=RPS3A PE=1 SV=2	1	17	17	17	2	2	1	14	14	11	2	2	1	14	14	11	2	2	1	14	14	11	56.1	56.1	56.1	29.945	264	264	0	94.786	9.8	16.3	6.4	50	48.1	44.7	413870000	3366000	3755500	2080900	106320000	173700000
Q96PK6	Q96PK6	18	18	18	RNA-binding protein 14	RBM14	sp|Q96PK6|RBM14_HUMAN RNA-binding protein 14 OS=Homo sapiens OX=9606 GN=RBM14 PE=1 SV=2	1	18	18	18	3	1	1	12	13	16	3	1	1	12	13	16	3	1	1	12	13	16	29.1	29.1	29.1	69.491	669	669	0	77.605	6.1	2.4	2.4	19.4	24.5	29.1	408910000	2578400	1262700	1333700	104700000	132540000
P62424	P62424	17	17	17	60S ribosomal protein L7a	RPL7A	sp|P62424|RL7A_HUMAN 60S ribosomal protein L7a OS=Homo sapiens OX=9606 GN=RPL7A PE=1 SV=2	1	17	17	17	2	2	4	11	10	11	2	2	4	11	10	11	2	2	4	11	10	11	50.4	50.4	50.4	29.995	266	266	0	86.86	13.2	13.9	25.6	32.7	39.8	32.7	416660000	4516100	6058300	7849700	119350000	172560000
Q9BRD0	Q9BRD0	21	21	21	BUD13 homolog	BUD13	sp|Q9BRD0|BUD13_HUMAN BUD13 homolog OS=Homo sapiens OX=9606 GN=BUD13 PE=1 SV=1	1	21	21	21	0	0	0	15	18	18	0	0	0	15	18	18	0	0	0	15	18	18	31	31	31	70.52	619	619	0	146.41	0	0	0	27.1	27.1	26.3	389290000	0	0	0	95488000	132990000
Q9UBB9	Q9UBB9	26	26	26	Tuftelin-interacting protein 11	TFIP11	sp|Q9UBB9|TFP11_HUMAN Tuftelin-interacting protein 11 OS=Homo sapiens OX=9606 GN=TFIP11 PE=1 SV=1	1	26	26	26	0	0	0	10	20	18	0	0	0	10	20	18	0	0	0	10	20	18	31.1	31.1	31.1	96.819	837	837	0	251.17	0	0	0	12.8	27.4	19.1	388260000	0	0	0	80358000	166090000
P52292	P52292	18	18	18	Importin subunit alpha-1	KPNA2	sp|P52292|IMA1_HUMAN Importin subunit alpha-1 OS=Homo sapiens OX=9606 GN=KPNA2 PE=1 SV=1	1	18	18	18	0	0	1	11	12	16	0	0	1	11	12	16	0	0	1	11	12	16	40.3	40.3	40.3	57.861	529	529	0	315.42	0	0	2.8	31	35.7	40.3	382680000	0	0	406960	88256000	159550000
P05386	P05386	4	3	3	60S acidic ribosomal protein P1	RPLP1	sp|P05386|RLA1_HUMAN 60S acidic ribosomal protein P1 OS=Homo sapiens OX=9606 GN=RPLP1 PE=1 SV=1	1	4	3	3	0	2	1	3	3	3	0	2	1	2	3	2	0	2	1	2	3	2	71.1	56.1	56.1	11.514	114	114	0	51.318	0	51.8	14	66.7	56.1	66.7	399860000	0	6132600	12255000	117350000	185690000
Q15365	Q15365	18	18	14	Poly(rC)-binding protein 1	PCBP1	sp|Q15365|PCBP1_HUMAN Poly(rC)-binding protein 1 OS=Homo sapiens OX=9606 GN=PCBP1 PE=1 SV=2	1	18	18	14	4	1	3	14	12	12	4	1	3	14	12	12	3	0	1	11	11	10	62.6	62.6	57.3	37.497	356	356	0	267.41	11.8	3.1	12.4	46.9	55.1	47.5	387990000	5837800	1631200	2567200	96779000	154470000
Q15007	Q15007	17	17	17	Pre-mRNA-splicing regulator WTAP	WTAP	sp|Q15007|FL2D_HUMAN Pre-mRNA-splicing regulator WTAP OS=Homo sapiens OX=9606 GN=WTAP PE=1 SV=2	1	17	17	17	0	0	0	12	11	14	0	0	0	12	11	14	0	0	0	12	11	14	42.7	42.7	42.7	44.243	396	396	0	323.31	0	0	0	35.9	34.1	39.4	375810000	0	0	0	76362000	111300000
P62081	P62081	10	10	10	40S ribosomal protein S7	RPS7	sp|P62081|RS7_HUMAN 40S ribosomal protein S7 OS=Homo sapiens OX=9606 GN=RPS7 PE=1 SV=1	1	10	10	10	2	2	3	6	9	4	2	2	3	6	9	4	2	2	3	6	9	4	50.5	50.5	50.5	22.127	194	194	0	214.02	19.1	19.6	19.6	35.1	46.9	22.2	432720000	37328000	8572900	20610000	118900000	163420000
Q8WWY3	Q8WWY3	21	21	21	U4/U6 small nuclear ribonucleoprotein Prp31	PRPF31	sp|Q8WWY3|PRP31_HUMAN U4/U6 small nuclear ribonucleoprotein Prp31 OS=Homo sapiens OX=9606 GN=PRPF31 PE=1 SV=2	1	21	21	21	0	0	0	12	13	15	0	0	0	12	13	15	0	0	0	12	13	15	39.9	39.9	39.9	55.455	499	499	0	143.02	0	0	0	28.1	33.1	33.1	364250000	0	0	0	101270000	119900000
P63145	P63145	25	25	5	Endogenous retrovirus group K member 24 Gag polyprotein	ERVK-24	sp|P63145|GAK24_HUMAN Endogenous retrovirus group K member 24 Gag polyprotein OS=Homo sapiens OX=9606 GN=ERVK-24 PE=1 SV=2	1	25	25	5	0	0	0	16	20	18	0	0	0	16	20	18	0	0	0	5	5	5	46.2	46.2	9.2	74.039	666	666	0	154.27	0	0	0	34.7	40.5	39.6	359330000	0	0	0	101340000	160080000
P84098	P84098	12	12	12	60S ribosomal protein L19	RPL19	sp|P84098|RL19_HUMAN 60S ribosomal protein L19 OS=Homo sapiens OX=9606 GN=RPL19 PE=1 SV=1	1	12	12	12	2	2	1	8	11	7	2	2	1	8	11	7	2	2	1	8	11	7	41.8	41.8	41.8	23.466	196	196	0	57.227	9.2	9.2	9.2	30.1	37.8	27.6	362230000	3897500	3056700	1934600	93225000	140550000
Q9BRL6	Q9BRL6	11	11	10	Serine/arginine-rich splicing factor 8	SRSF8	sp|Q9BRL6|SRSF8_HUMAN Serine/arginine-rich splicing factor 8 OS=Homo sapiens OX=9606 GN=SRSF8 PE=1 SV=1	1	11	11	10	0	0	0	9	11	8	0	0	0	9	11	8	0	0	0	8	10	7	32.6	32.6	32.6	32.287	282	282	0	105.6	0	0	0	30.9	32.6	28	344980000	0	0	0	112600000	154540000
Q9HCG8	Q9HCG8	27	27	27	Pre-mRNA-splicing factor CWC22 homolog	CWC22	sp|Q9HCG8|CWC22_HUMAN Pre-mRNA-splicing factor CWC22 homolog OS=Homo sapiens OX=9606 GN=CWC22 PE=1 SV=3	1	27	27	27	0	0	0	16	24	14	0	0	0	16	24	14	0	0	0	16	24	14	26	26	26	105.47	908	908	0	103.64	0	0	0	15.4	24.2	15.7	332740000	0	0	0	61539000	149890000
P09661	P09661	17	17	17	U2 small nuclear ribonucleoprotein A	SNRPA1	sp|P09661|RU2A_HUMAN U2 small nuclear ribonucleoprotein A OS=Homo sapiens OX=9606 GN=SNRPA1 PE=1 SV=2	1	17	17	17	0	0	0	14	11	13	0	0	0	14	11	13	0	0	0	14	11	13	46.3	46.3	46.3	28.415	255	255	0	142.22	0	0	0	38.4	33.3	41.2	328390000	0	0	0	87541000	109040000
Q5VTL8	Q5VTL8	9	9	9	Pre-mRNA-splicing factor 38B	PRPF38B	sp|Q5VTL8|PR38B_HUMAN Pre-mRNA-splicing factor 38B OS=Homo sapiens OX=9606 GN=PRPF38B PE=1 SV=1	1	9	9	9	0	0	0	6	8	6	0	0	0	6	8	6	0	0	0	6	8	6	24.5	24.5	24.5	64.467	546	546	0	136.35	0	0	0	18.5	22.3	17.2	327350000	0	0	0	55563000	120760000
Q92804	Q92804	9	7	7	TATA-binding protein-associated factor 2N	TAF15	sp|Q92804|RBP56_HUMAN TATA-binding protein-associated factor 2N OS=Homo sapiens OX=9606 GN=TAF15 PE=1 SV=1	1	9	7	7	0	0	0	8	7	8	0	0	0	7	5	6	0	0	0	7	5	6	12.3	10	10	61.829	592	592	0	58.666	0	0	0	12.3	10.3	10.3	319770000	0	0	0	85751000	112520000
Q6I9Y2	Q6I9Y2	10	10	10	THO complex subunit 7 homolog	THOC7	sp|Q6I9Y2|THOC7_HUMAN THO complex subunit 7 homolog OS=Homo sapiens OX=9606 GN=THOC7 PE=1 SV=3	1	10	10	10	0	0	0	7	9	10	0	0	0	7	9	10	0	0	0	7	9	10	41.7	41.7	41.7	23.743	204	204	0	98.824	0	0	0	36.8	41.7	41.7	317460000	0	0	0	89182000	92765000
Q15424	Q15424	17	17	14	Scaffold attachment factor B1	SAFB	sp|Q15424|SAFB1_HUMAN Scaffold attachment factor B1 OS=Homo sapiens OX=9606 GN=SAFB PE=1 SV=4	1	17	17	14	0	0	0	16	8	8	0	0	0	16	8	8	0	0	0	13	7	6	21.9	21.9	19.2	102.64	915	915	0	191.55	0	0	0	19.3	13.4	10.8	313730000	0	0	0	143780000	85215000
Q9Y3X0	Q9Y3X0	12	12	12	Coiled-coil domain-containing protein 9	CCDC9	sp|Q9Y3X0|CCDC9_HUMAN Coiled-coil domain-containing protein 9 OS=Homo sapiens OX=9606 GN=CCDC9 PE=1 SV=1	1	12	12	12	0	0	0	10	8	12	0	0	0	10	8	12	0	0	0	10	8	12	19.6	19.6	19.6	59.702	531	531	0	71.869	0	0	0	19.6	16	19.6	308130000	0	0	0	86654000	88844000
P60709;Q6S8J3;A5A3E0;P0CG38;Q9BYX7;P0CG39	P60709	36;10;7;5;4;3	2;0;0;0;0;0	2;0;0;0;0;0	Actin, cytoplasmic 1;Actin, cytoplasmic 1, N-terminally processed	ACTB	sp|P60709|ACTB_HUMAN Actin, cytoplasmic 1 OS=Homo sapiens OX=9606 GN=ACTB PE=1 SV=1	6	36	2	2	26	24	19	25	30	19	2	2	2	2	2	2	2	2	2	2	2	2	77.1	7.2	7.2	41.736	375	375;1075;1075;1075;375;1038	0	152.93	70.4	71.7	66.1	72	73.1	65.3	682200000	114870000	179520000	83585000	101560000	138110000
Q92945	Q92945	15	15	14	Far upstream element-binding protein 2	KHSRP	sp|Q92945|FUBP2_HUMAN Far upstream element-binding protein 2 OS=Homo sapiens OX=9606 GN=KHSRP PE=1 SV=4	1	15	15	14	0	1	1	11	8	15	0	1	1	11	8	15	0	1	1	11	8	14	26.7	26.7	24.2	73.114	711	711	0	131.56	0	1.5	1.5	23.1	16.7	26.7	304400000	0	635920	746880	81691000	80913000
O43172	O43172	25	25	25	U4/U6 small nuclear ribonucleoprotein Prp4	PRPF4	sp|O43172|PRP4_HUMAN U4/U6 small nuclear ribonucleoprotein Prp4 OS=Homo sapiens OX=9606 GN=PRPF4 PE=1 SV=2	1	25	25	25	0	0	0	15	23	15	0	0	0	15	23	15	0	0	0	15	23	15	55.7	55.7	55.7	58.449	522	522	0	175.02	0	0	0	30.8	52.7	36.4	302460000	0	0	0	59932000	146470000
Q7L014	Q7L014	26	26	26	Probable ATP-dependent RNA helicase DDX46	DDX46	sp|Q7L014|DDX46_HUMAN Probable ATP-dependent RNA helicase DDX46 OS=Homo sapiens OX=9606 GN=DDX46 PE=1 SV=2	1	26	26	26	0	0	0	15	22	16	0	0	0	15	22	16	0	0	0	15	22	16	31.9	31.9	31.9	117.36	1031	1031	0	145.85	0	0	0	21.2	27.4	22.3	302150000	0	0	0	79950000	134790000
Q9H2H8	Q9H2H8	11	11	11	Peptidyl-prolyl cis-trans isomerase-like 3	PPIL3	sp|Q9H2H8|PPIL3_HUMAN Peptidyl-prolyl cis-trans isomerase-like 3 OS=Homo sapiens OX=9606 GN=PPIL3 PE=1 SV=1	1	11	11	11	0	0	0	8	8	10	0	0	0	8	8	10	0	0	0	8	8	10	85.7	85.7	85.7	18.154	161	161	0	259.12	0	0	0	83.9	63.4	82	298280000	0	0	0	107780000	74158000
O15042	O15042	15	15	15	U2 snRNP-associated SURP motif-containing protein	U2SURP	sp|O15042|SR140_HUMAN U2 snRNP-associated SURP motif-containing protein OS=Homo sapiens OX=9606 GN=U2SURP PE=1 SV=2	1	15	15	15	0	0	0	10	11	9	0	0	0	10	11	9	0	0	0	10	11	9	19.5	19.5	19.5	118.29	1029	1029	0	86.805	0	0	0	12.9	15.8	13.1	292670000	0	0	0	87005000	93300000
P83731	P83731	10	10	10	60S ribosomal protein L24	RPL24	sp|P83731|RL24_HUMAN 60S ribosomal protein L24 OS=Homo sapiens OX=9606 GN=RPL24 PE=1 SV=1	1	10	10	10	2	1	1	9	7	5	2	1	1	9	7	5	2	1	1	9	7	5	49	49	49	17.779	157	157	0	59.409	13.4	8.3	8.3	49	36.9	24.2	307820000	8342900	6495600	4628900	90704000	120410000
Q86W42	Q86W42	12	12	12	THO complex subunit 6 homolog	THOC6	sp|Q86W42|THOC6_HUMAN THO complex subunit 6 homolog OS=Homo sapiens OX=9606 GN=THOC6 PE=1 SV=1	1	12	12	12	0	0	0	7	8	9	0	0	0	7	8	9	0	0	0	7	8	9	49.3	49.3	49.3	37.535	341	341	0	163.65	0	0	0	39	36.7	41.9	284450000	0	0	0	72248000	96152000
Q96FV9	Q96FV9	20	20	20	THO complex subunit 1	THOC1	sp|Q96FV9|THOC1_HUMAN THO complex subunit 1 OS=Homo sapiens OX=9606 GN=THOC1 PE=1 SV=1	1	20	20	20	0	0	0	10	13	15	0	0	0	10	13	15	0	0	0	10	13	15	39.7	39.7	39.7	75.665	657	657	0	66.508	0	0	0	19.3	25.6	31.1	282060000	0	0	0	80296000	77799000
P30414	P30414	22	22	22	NK-tumor recognition protein;Putative peptidyl-prolyl cis-trans isomerase	NKTR	sp|P30414|NKTR_HUMAN NK-tumor recognition protein OS=Homo sapiens OX=9606 GN=NKTR PE=1 SV=2	1	22	22	22	0	0	0	12	13	18	0	0	0	12	13	18	0	0	0	12	13	18	19.4	19.4	19.4	165.67	1462	1462	0	106.54	0	0	0	13.2	13.9	16.5	280010000	0	0	0	68167000	87714000
Q6PKG0;Q659C4	Q6PKG0	18;1	18;1	18;1	La-related protein 1	LARP1	sp|Q6PKG0|LARP1_HUMAN La-related protein 1 OS=Homo sapiens OX=9606 GN=LARP1 PE=1 SV=2	2	18	18	18	0	0	0	12	10	12	0	0	0	12	10	12	0	0	0	12	10	12	25.8	25.8	25.8	123.51	1096	1096;914	0	117.32	0	0	0	19.5	16.2	16.3	279890000	0	0	0	81432000	71309000
Q96MU7	Q96MU7	19	19	19	YTH domain-containing protein 1	YTHDC1	sp|Q96MU7|YTDC1_HUMAN YTH domain-containing protein 1 OS=Homo sapiens OX=9606 GN=YTHDC1 PE=1 SV=3	1	19	19	19	0	0	0	13	17	10	0	0	0	13	17	10	0	0	0	13	17	10	24.3	24.3	24.3	84.699	727	727	0	102.09	0	0	0	17.6	23.2	12.7	275720000	0	0	0	71184000	120870000
P39023;Q92901	P39023	22;2	22;2	22;2	60S ribosomal protein L3	RPL3	sp|P39023|RL3_HUMAN 60S ribosomal protein L3 OS=Homo sapiens OX=9606 GN=RPL3 PE=1 SV=2	2	22	22	22	2	1	2	11	18	9	2	1	2	11	18	9	2	1	2	11	18	9	56.6	56.6	56.6	46.108	403	403;407	0	122.97	12.7	5.5	6.5	21.1	47.1	23.1	303860000	28447000	1741100	1998200	52398000	172800000
O60306	O60306	28	28	28	Intron-binding protein aquarius	AQR	sp|O60306|AQR_HUMAN RNA helicase aquarius OS=Homo sapiens OX=9606 GN=AQR PE=1 SV=4	1	28	28	28	0	0	0	12	26	13	0	0	0	12	26	13	0	0	0	12	26	13	25	25	25	171.29	1485	1485	0	230.19	0	0	0	11.4	22.9	10.5	268430000	0	0	0	45686000	161780000
O14776;Q5VWI1	O14776	19;2	19;2	19;2	Transcription elongation regulator 1	TCERG1	sp|O14776|TCRG1_HUMAN Transcription elongation regulator 1 OS=Homo sapiens OX=9606 GN=TCERG1 PE=1 SV=2	2	19	19	19	0	0	0	10	13	15	0	0	0	10	13	15	0	0	0	10	13	15	18.5	18.5	18.5	123.9	1098	1098;586	0	79.891	0	0	0	9.8	12.7	14.4	263960000	0	0	0	83618000	75073000
P06748	P06748	5	5	5	Nucleophosmin	NPM1	sp|P06748|NPM_HUMAN Nucleophosmin OS=Homo sapiens OX=9606 GN=NPM1 PE=1 SV=2	1	5	5	5	2	2	2	5	5	4	2	2	2	5	5	4	2	2	2	5	5	4	29.9	29.9	29.9	32.575	294	294	0	323.31	16.7	17	12.2	29.9	29.9	22.8	277910000	4883700	4912900	4372500	77657000	111200000
O60231	O60231	21	20	20	Putative pre-mRNA-splicing factor ATP-dependent RNA helicase DHX16	DHX16	sp|O60231|DHX16_HUMAN Pre-mRNA-splicing factor ATP-dependent RNA helicase DHX16 OS=Homo sapiens OX=9606 GN=DHX16 PE=1 SV=2	1	21	20	20	0	0	0	13	16	12	0	0	0	13	15	11	0	0	0	13	15	11	21.5	20.7	20.7	119.26	1041	1041	0	198.51	0	0	0	15.9	17.9	12.1	263400000	0	0	0	64678000	93950000
Q9Y383	Q9Y383	15	15	12	Putative RNA-binding protein Luc7-like 2	LUC7L2	sp|Q9Y383|LC7L2_HUMAN Putative RNA-binding protein Luc7-like 2 OS=Homo sapiens OX=9606 GN=LUC7L2 PE=1 SV=2	1	15	15	12	0	0	0	12	14	11	0	0	0	12	14	11	0	0	0	9	11	8	35.5	35.5	30.6	46.513	392	392	0	121.57	0	0	0	27.6	33.7	29.3	261060000	0	0	0	64342000	99236000
P53350	P53350	17	17	17	Serine/threonine-protein kinase PLK1	PLK1	sp|P53350|PLK1_HUMAN Serine/threonine-protein kinase PLK1 OS=Homo sapiens OX=9606 GN=PLK1 PE=1 SV=1	1	17	17	17	0	0	0	9	14	12	0	0	0	9	14	12	0	0	0	9	14	12	34.7	34.7	34.7	68.254	603	603	0	66.483	0	0	0	21.9	30.7	26	259990000	0	0	0	69679000	88959000
Q86XP3	Q86XP3	25	25	25	ATP-dependent RNA helicase DDX42	DDX42	sp|Q86XP3|DDX42_HUMAN ATP-dependent RNA helicase DDX42 OS=Homo sapiens OX=9606 GN=DDX42 PE=1 SV=1	1	25	25	25	0	0	0	13	19	15	0	0	0	13	19	15	0	0	0	13	19	15	35.9	35.9	35.9	102.97	938	938	0	164.47	0	0	0	16.2	29.5	22.2	259500000	0	0	0	56708000	99572000
P62750	P62750	4	4	4	60S ribosomal protein L23a	RPL23A	sp|P62750|RL23A_HUMAN 60S ribosomal protein L23a OS=Homo sapiens OX=9606 GN=RPL23A PE=1 SV=1	1	4	4	4	0	2	2	3	3	4	0	2	2	3	3	4	0	2	2	3	3	4	27.6	27.6	27.6	17.695	156	156	0	39.677	0	10.9	10.9	20.5	20.5	27.6	273760000	0	10060000	7799600	67088000	96744000
Q8NDT2	Q8NDT2	26	21	21	Putative RNA-binding protein 15B	RBM15B	sp|Q8NDT2|RB15B_HUMAN Putative RNA-binding protein 15B OS=Homo sapiens OX=9606 GN=RBM15B PE=1 SV=3	1	26	21	21	0	0	0	20	19	20	0	0	0	16	14	16	0	0	0	16	14	16	42.6	39	39	97.204	890	890	0	85.876	0	0	0	34.3	32.9	33.7	254660000	0	0	0	77823000	78855000
Q13769	Q13769	12	12	12	THO complex subunit 5 homolog	THOC5	sp|Q13769|THOC5_HUMAN THO complex subunit 5 homolog OS=Homo sapiens OX=9606 GN=THOC5 PE=1 SV=2	1	12	12	12	0	0	0	6	10	8	0	0	0	6	10	8	0	0	0	6	10	8	22.1	22.1	22.1	78.507	683	683	0	159.29	0	0	0	12.3	21.2	13.9	253070000	0	0	0	58872000	88592000
P60866	P60866	6	6	6	40S ribosomal protein S20	RPS20	sp|P60866|RS20_HUMAN 40S ribosomal protein S20 OS=Homo sapiens OX=9606 GN=RPS20 PE=1 SV=1	1	6	6	6	2	1	2	4	4	4	2	1	2	4	4	4	2	1	2	4	4	4	58	58	58	13.373	119	119	0	103.57	25.2	16.8	26.9	41.2	41.2	31.9	275050000	4684700	10435000	8299900	77077000	71403000
Q07020	Q07020	8	8	8	60S ribosomal protein L18	RPL18	sp|Q07020|RL18_HUMAN 60S ribosomal protein L18 OS=Homo sapiens OX=9606 GN=RPL18 PE=1 SV=2	1	8	8	8	4	3	2	5	7	6	4	3	2	5	7	6	4	3	2	5	7	6	29.8	29.8	29.8	21.634	188	188	0	95.666	23.9	18.1	12.8	24.5	29.3	29.3	270030000	6498200	5951400	8777900	62930000	132990000
P52298	P52298	9	9	9	Nuclear cap-binding protein subunit 2	NCBP2	sp|P52298|NCBP2_HUMAN Nuclear cap-binding protein subunit 2 OS=Homo sapiens OX=9606 GN=NCBP2 PE=1 SV=1	1	9	9	9	0	0	0	7	7	7	0	0	0	7	7	7	0	0	0	7	7	7	42.9	42.9	42.9	18.001	156	156	0	42.88	0	0	0	42.9	32.1	32.1	243400000	0	0	0	87675000	71530000
P38646	P38646	22	22	22	Stress-70 protein, mitochondrial	HSPA9	sp|P38646|GRP75_HUMAN Stress-70 protein, mitochondrial OS=Homo sapiens OX=9606 GN=HSPA9 PE=1 SV=2	1	22	22	22	3	4	2	8	14	16	3	4	2	8	14	16	3	4	2	8	14	16	37.1	37.1	37.1	73.68	679	679	0	269.83	8.5	9.3	5.3	16.2	24.3	24.6	297750000	49997000	5715900	1602000	56819000	80178000
P50914	P50914	10	10	10	60S ribosomal protein L14	RPL14	sp|P50914|RL14_HUMAN 60S ribosomal protein L14 OS=Homo sapiens OX=9606 GN=RPL14 PE=1 SV=4	1	10	10	10	4	2	3	6	8	6	4	2	3	6	8	6	4	2	3	6	8	6	26.5	26.5	26.5	23.432	215	215	0	87.967	16.7	11.2	16.3	21.9	26	26	262870000	10519000	5268700	8942300	49420000	146490000
P05388;Q8NHW5	P05388;Q8NHW5	10;7	10;7	10;7	60S acidic ribosomal protein P0;60S acidic ribosomal protein P0-like	RPLP0;RPLP0P6	sp|P05388|RLA0_HUMAN 60S acidic ribosomal protein P0 OS=Homo sapiens OX=9606 GN=RPLP0 PE=1 SV=1;sp|Q8NHW5|RLA0L_HUMAN 60S acidic ribosomal protein P0-like OS=Homo sapiens OX=9606 GN=RPLP0P6 PE=5 SV=1	2	10	10	10	2	2	1	8	8	9	2	2	1	8	8	9	2	2	1	8	8	9	39.1	39.1	39.1	34.273	317	317;317	0	68.212	6.9	6.9	3.2	33.1	33.1	39.1	240550000	2083300	822330	532510	66266000	76208000
P37108	P37108	7	7	7	Signal recognition particle 14 kDa protein	SRP14	sp|P37108|SRP14_HUMAN Signal recognition particle 14 kDa protein OS=Homo sapiens OX=9606 GN=SRP14 PE=1 SV=2	1	7	7	7	1	1	0	5	6	6	1	1	0	5	6	6	1	1	0	5	6	6	47.1	47.1	47.1	14.57	136	136	0	68.023	10.3	10.3	0	41.2	46.3	46.3	238650000	545680	1230700	0	71427000	63532000
P14635	P14635	5	5	5	G2/mitotic-specific cyclin-B1	CCNB1	sp|P14635|CCNB1_HUMAN G2/mitotic-specific cyclin-B1 OS=Homo sapiens OX=9606 GN=CCNB1 PE=1 SV=1	1	5	5	5	0	0	0	4	4	4	0	0	0	4	4	4	0	0	0	4	4	4	15.9	15.9	15.9	48.337	433	433	0	58.939	0	0	0	13.4	13.4	13.4	233880000	0	0	0	73495000	71498000
P18621	P18621	12	12	12	60S ribosomal protein L17	RPL17	sp|P18621|RL17_HUMAN 60S ribosomal protein L17 OS=Homo sapiens OX=9606 GN=RPL17 PE=1 SV=3	1	12	12	12	1	0	0	6	11	11	1	0	0	6	11	11	1	0	0	6	11	11	57.6	57.6	57.6	21.397	184	184	0	56.155	6.5	0	0	46.7	57.6	57.6	217410000	527190	0	0	62648000	92794000
P04792	P04792	7	7	7	Heat shock protein beta-1	HSPB1	sp|P04792|HSPB1_HUMAN Heat shock protein beta-1 OS=Homo sapiens OX=9606 GN=HSPB1 PE=1 SV=2	1	7	7	7	3	3	3	6	7	7	3	3	3	6	7	7	3	3	3	6	7	7	56.6	56.6	56.6	22.782	205	205	0	72.626	31.7	21.5	31.7	48.8	56.6	56.6	245810000	11185000	8014000	13333000	58060000	69784000
P55769	P55769	12	12	12	NHP2-like protein 1;NHP2-like protein 1, N-terminally processed	NHP2L1	sp|P55769|NH2L1_HUMAN NHP2-like protein 1 OS=Homo sapiens OX=9606 GN=SNU13 PE=1 SV=3	1	12	12	12	0	0	0	11	8	10	0	0	0	11	8	10	0	0	0	11	8	10	54.7	54.7	54.7	14.173	128	128	0	80.239	0	0	0	54.7	41.4	42.2	209560000	0	0	0	76213000	68632000
P62701;Q8TD47;P22090	P62701	12;4;2	12;4;2	12;4;2	40S ribosomal protein S4, X isoform	RPS4X	sp|P62701|RS4X_HUMAN 40S ribosomal protein S4, X isoform OS=Homo sapiens OX=9606 GN=RPS4X PE=1 SV=2	3	12	12	12	2	2	0	8	9	6	2	2	0	8	9	6	2	2	0	8	9	6	43.7	43.7	43.7	29.597	263	263;263;263	0	45.212	8	8	0	28.1	30.4	26.6	224760000	5538000	10640000	0	65292000	99628000
P49760	P49760	10	10	10	Dual specificity protein kinase CLK2	CLK2	sp|P49760|CLK2_HUMAN Dual specificity protein kinase CLK2 OS=Homo sapiens OX=9606 GN=CLK2 PE=1 SV=1	1	10	10	10	0	0	0	8	9	5	0	0	0	8	9	5	0	0	0	8	9	5	20.4	20.4	20.4	60.089	499	499	0	62.762	0	0	0	18	19.8	11.4	207650000	0	0	0	53632000	99606000
Q92620	Q92620	9	9	9	Pre-mRNA-splicing factor ATP-dependent RNA helicase PRP16	DHX38	sp|Q92620|PRP16_HUMAN Pre-mRNA-splicing factor ATP-dependent RNA helicase PRP16 OS=Homo sapiens OX=9606 GN=DHX38 PE=1 SV=2	1	9	9	9	0	0	0	3	7	5	0	0	0	3	7	5	0	0	0	3	7	5	13.1	13.1	13.1	140.5	1227	1227	0	263.73	0	0	0	6	11.7	7.4	206900000	0	0	0	60455000	43799000
Q9H7N4	Q9H7N4	13	13	13	Splicing factor, arginine/serine-rich 19	SCAF1	sp|Q9H7N4|SFR19_HUMAN Splicing factor, arginine/serine-rich 19 OS=Homo sapiens OX=9606 GN=SCAF1 PE=1 SV=3	1	13	13	13	0	0	0	11	11	9	0	0	0	11	11	9	0	0	0	11	11	9	13.4	13.4	13.4	139.27	1312	1312	0	93.606	0	0	0	11.4	10.1	10.3	203640000	0	0	0	74575000	58657000
P18124	P18124	11	11	11	60S ribosomal protein L7	RPL7	sp|P18124|RL7_HUMAN 60S ribosomal protein L7 OS=Homo sapiens OX=9606 GN=RPL7 PE=1 SV=1	1	11	11	11	0	1	2	5	10	6	0	1	2	5	10	6	0	1	2	5	10	6	35.5	35.5	35.5	29.225	248	248	0	118.34	0	4.4	13.3	20.2	34.3	26.2	209670000	0	5709300	1967000	39430000	116350000
Q8WUQ7	Q8WUQ7	16	16	16	Cactin	CACTIN	sp|Q8WUQ7|CATIN_HUMAN Cactin OS=Homo sapiens OX=9606 GN=CACTIN PE=1 SV=3	1	16	16	16	0	0	0	7	12	11	0	0	0	7	12	11	0	0	0	7	12	11	25.9	25.9	25.9	88.701	758	758	0	187.02	0	0	0	15.4	23	16.5	200570000	0	0	0	66402000	70208000
Q96A72	Q96A72	15	1	1	Protein mago nashi homolog 2	MAGOHB	sp|Q96A72|MGN2_HUMAN Protein mago nashi homolog 2 OS=Homo sapiens OX=9606 GN=MAGOHB PE=1 SV=1	1	15	1	1	0	0	0	12	13	11	0	0	0	1	1	1	0	0	0	1	1	1	88.5	6.1	6.1	17.276	148	148	0	6.4767	0	0	0	72.3	80.4	61.5	200400000	0	0	0	77136000	86112000
P0DMV9;P0DMV8	P0DMV9;P0DMV8	17;17	14;14	9;9	Heat shock 70 kDa protein 1B;Heat shock 70 kDa protein 1A	HSPA1B;HSPA1A	sp|P0DMV9|HS71B_HUMAN Heat shock 70 kDa protein 1B OS=Homo sapiens OX=9606 GN=HSPA1B PE=1 SV=1;sp|P0DMV8|HS71A_HUMAN Heat shock 70 kDa protein 1A OS=Homo sapiens OX=9606 GN=HSPA1A PE=1 SV=1	2	17	14	9	2	0	0	8	16	12	1	0	0	6	13	10	1	0	0	3	9	7	27.9	24.8	18.3	70.051	641	641;641	0	63.107	4.4	0	0	16.4	27.9	24	188830000	478530	0	0	32047000	79241000
Q9UNP9	Q9UNP9	12	12	12	Peptidyl-prolyl cis-trans isomerase E	PPIE	sp|Q9UNP9|PPIE_HUMAN Peptidyl-prolyl cis-trans isomerase E OS=Homo sapiens OX=9606 GN=PPIE PE=1 SV=1	1	12	12	12	0	0	0	8	10	6	0	0	0	8	10	6	0	0	0	8	10	6	32.9	32.9	32.9	33.43	301	301	0	78.251	0	0	0	26.2	28.9	26.2	186170000	0	0	0	71079000	81727000
P49207	P49207	12	12	12	60S ribosomal protein L34	RPL34	sp|P49207|RL34_HUMAN 60S ribosomal protein L34 OS=Homo sapiens OX=9606 GN=RPL34 PE=1 SV=3	1	12	12	12	0	0	1	6	11	6	0	0	1	6	11	6	0	0	1	6	11	6	53.8	53.8	53.8	13.293	117	117	0	58.531	0	0	6.8	36.8	53	36.8	184530000	0	0	1660800	42730000	106920000
Q9Y3B4	Q9Y3B4	12	12	12	Splicing factor 3B subunit 6	SF3B6	sp|Q9Y3B4|SF3B6_HUMAN Splicing factor 3B subunit 6 OS=Homo sapiens OX=9606 GN=SF3B6 PE=1 SV=1	1	12	12	12	0	0	0	7	10	9	0	0	0	7	10	9	0	0	0	7	10	9	74.4	74.4	74.4	14.585	125	125	0	53.104	0	0	0	50.4	65.6	70.4	182210000	0	0	0	28248000	83442000
P08670;P17661;Q16352;P07197	P08670	20;1;1;1	20;1;1;1	20;1;1;1	Vimentin	VIM	sp|P08670|VIME_HUMAN Vimentin OS=Homo sapiens OX=9606 GN=VIM PE=1 SV=4	4	20	20	20	10	4	5	9	8	11	10	4	5	9	8	11	10	4	5	9	8	11	57.5	57.5	57.5	53.651	466	466;470;499;916	0	323.31	37.1	17	15.5	29.2	27.7	31.3	313940000	63884000	40235000	29837000	58389000	51865000
Q6P6C2	Q6P6C2	13	13	13	RNA demethylase ALKBH5	ALKBH5	sp|Q6P6C2|ALKB5_HUMAN RNA demethylase ALKBH5 OS=Homo sapiens OX=9606 GN=ALKBH5 PE=1 SV=2	1	13	13	13	0	0	0	9	8	10	0	0	0	9	8	10	0	0	0	9	8	10	32.5	32.5	32.5	44.255	394	394	0	168	0	0	0	26.9	25.4	31.5	179490000	0	0	0	62966000	65102000
P52597	P52597	12	10	10	Heterogeneous nuclear ribonucleoprotein F;Heterogeneous nuclear ribonucleoprotein F, N-terminally processed	HNRNPF	sp|P52597|HNRPF_HUMAN Heterogeneous nuclear ribonucleoprotein F OS=Homo sapiens OX=9606 GN=HNRNPF PE=1 SV=3	1	12	10	10	0	0	0	7	9	11	0	0	0	7	7	9	0	0	0	7	7	9	39.3	32.8	32.8	45.671	415	415	0	50.18	0	0	0	21.7	31.8	31.6	178940000	0	0	0	42789000	74274000
Q9NWB6	Q9NWB6	7	7	7	Arginine and glutamate-rich protein 1	ARGLU1	sp|Q9NWB6|ARGL1_HUMAN Arginine and glutamate-rich protein 1 OS=Homo sapiens OX=9606 GN=ARGLU1 PE=1 SV=1	1	7	7	7	1	0	0	4	7	4	1	0	0	4	7	4	1	0	0	4	7	4	24.5	24.5	24.5	33.216	273	273	0	44.541	3.3	0	0	19	24.5	17.2	183080000	4584100	0	0	50468000	61289000
P46776	P46776	6	6	6	60S ribosomal protein L27a	RPL27A	sp|P46776|RL27A_HUMAN 60S ribosomal protein L27a OS=Homo sapiens OX=9606 GN=RPL27A PE=1 SV=2	1	6	6	6	1	1	0	3	5	4	1	1	0	3	5	4	1	1	0	3	5	4	49.3	49.3	49.3	16.561	148	148	0	30.091	7.4	7.4	0	17.6	31.1	35.8	186820000	4304300	4646500	0	34772000	74965000
P62316	P62316	5	5	5	Small nuclear ribonucleoprotein Sm D2	SNRPD2	sp|P62316|SMD2_HUMAN Small nuclear ribonucleoprotein Sm D2 OS=Homo sapiens OX=9606 GN=SNRPD2 PE=1 SV=1	1	5	5	5	1	0	0	5	5	4	1	0	0	5	5	4	1	0	0	5	5	4	55.9	55.9	55.9	13.527	118	118	0	34.14	16.9	0	0	55.9	55.9	55.9	182380000	4790300	0	0	37293000	80405000
Q09161	Q09161	16	16	16	Nuclear cap-binding protein subunit 1	NCBP1	sp|Q09161|NCBP1_HUMAN Nuclear cap-binding protein subunit 1 OS=Homo sapiens OX=9606 GN=NCBP1 PE=1 SV=1	1	16	16	16	0	0	0	13	13	9	0	0	0	13	13	9	0	0	0	13	13	9	26.5	26.5	26.5	91.838	790	790	0	91.88	0	0	0	18.7	24.9	15.9	177120000	0	0	0	51857000	76321000
O95639	O95639	8	8	8	Cleavage and polyadenylation specificity factor subunit 4	CPSF4	sp|O95639|CPSF4_HUMAN Cleavage and polyadenylation specificity factor subunit 4 OS=Homo sapiens OX=9606 GN=CPSF4 PE=1 SV=1	1	8	8	8	0	0	0	6	6	6	0	0	0	6	6	6	0	0	0	6	6	6	40.9	40.9	40.9	30.255	269	269	0	114.64	0	0	0	36.4	39.4	37.2	175480000	0	0	0	50836000	64953000
P46778	P46778	5	5	5	60S ribosomal protein L21	RPL21	sp|P46778|RL21_HUMAN 60S ribosomal protein L21 OS=Homo sapiens OX=9606 GN=RPL21 PE=1 SV=2	1	5	5	5	0	1	2	4	3	3	0	1	2	4	3	3	0	1	2	4	3	3	35.6	35.6	35.6	18.565	160	160	0	38.241	0	11.2	20.6	31.9	25	21.9	181040000	0	2933400	3068600	50168000	68939000
O60828	O60828	5	5	5	Polyglutamine-binding protein 1	PQBP1	sp|O60828|PQBP1_HUMAN Polyglutamine-binding protein 1 OS=Homo sapiens OX=9606 GN=PQBP1 PE=1 SV=1	1	5	5	5	0	0	0	2	3	5	0	0	0	2	3	5	0	0	0	2	3	5	47.2	47.2	47.2	30.472	265	265	0	89.709	0	0	0	17.7	26.4	47.2	175020000	0	0	0	20996000	36852000
P26599	P26599	5	5	5	Polypyrimidine tract-binding protein 1	PTBP1	sp|P26599|PTBP1_HUMAN Polypyrimidine tract-binding protein 1 OS=Homo sapiens OX=9606 GN=PTBP1 PE=1 SV=1	1	5	5	5	1	0	0	3	4	4	1	0	0	3	4	4	1	0	0	3	4	4	14.3	14.3	14.3	57.221	531	531	0	21.336	2.6	0	0	6.2	11.3	9.2	174140000	0	0	0	43190000	61438000
P15880	P15880	12	12	12	40S ribosomal protein S2	RPS2	sp|P15880|RS2_HUMAN 40S ribosomal protein S2 OS=Homo sapiens OX=9606 GN=RPS2 PE=1 SV=2	1	12	12	12	0	0	0	8	11	8	0	0	0	8	11	8	0	0	0	8	11	8	34.1	34.1	34.1	31.324	293	293	0	53.859	0	0	0	27.6	34.1	25.6	173370000	0	0	0	35472000	95487000
P49761	P49761	10	10	10	Dual specificity protein kinase CLK3	CLK3	sp|P49761|CLK3_HUMAN Dual specificity protein kinase CLK3 OS=Homo sapiens OX=9606 GN=CLK3 PE=1 SV=3	1	10	10	10	0	0	0	6	9	6	0	0	0	6	9	6	0	0	0	6	9	6	18.5	18.5	18.5	73.514	638	638	0	43.874	0	0	0	10.3	16.5	11.8	172550000	0	0	0	50980000	76765000
P10412;Q02539;P22492;P16401	P10412	11;5;3;2	2;0;0;0	2;0;0;0	Histone H1.4	HIST1H1E	sp|P10412|H14_HUMAN Histone H1.4 OS=Homo sapiens OX=9606 GN=HIST1H1E PE=1 SV=2	4	11	2	2	5	8	6	8	11	11	1	2	1	2	2	2	1	2	1	2	2	2	37.9	9.6	9.6	21.865	219	219;215;207;226	0	10.939	32	32.4	31.5	32.4	37.9	37.9	221950000	11564000	40904000	1157300	49533000	56158000
P42677;Q71UM5	P42677;Q71UM5	6;3	6;3	6;3	40S ribosomal protein S27;40S ribosomal protein S27-like	RPS27;RPS27L	sp|P42677|RS27_HUMAN 40S ribosomal protein S27 OS=Homo sapiens OX=9606 GN=RPS27 PE=1 SV=3;sp|Q71UM5|RS27L_HUMAN 40S ribosomal protein S27-like OS=Homo sapiens OX=9606 GN=RPS27L PE=1 SV=3	2	6	6	6	2	1	2	5	6	4	2	1	2	5	6	4	2	1	2	5	6	4	46.4	46.4	46.4	9.461	84	84;84	0	36.039	25	15.5	25	45.2	46.4	45.2	181890000	6307800	2670600	4696500	46358000	67988000
P35637	P35637	10	10	8	RNA-binding protein FUS	FUS	sp|P35637|FUS_HUMAN RNA-binding protein FUS OS=Homo sapiens OX=9606 GN=FUS PE=1 SV=1	1	10	10	8	0	0	0	4	8	9	0	0	0	4	8	9	0	0	0	3	6	7	15.4	15.4	15.4	53.425	526	526	0	72.51	0	0	0	7.4	15.4	15	167710000	0	0	0	31053000	54867000
Q86X95	Q86X95	8	8	8	Corepressor interacting with RBPJ 1	CIR1	sp|Q86X95|CIR1_HUMAN Corepressor interacting with RBPJ 1 OS=Homo sapiens OX=9606 GN=CIR1 PE=1 SV=1	1	8	8	8	0	0	0	7	5	7	0	0	0	7	5	7	0	0	0	7	5	7	27.1	27.1	27.1	52.313	450	450	0	101.22	0	0	0	24.9	19.1	25.3	167280000	0	0	0	46823000	56571000
Q5BKZ1	Q5BKZ1	14	14	14	DBIRD complex subunit ZNF326	ZNF326	sp|Q5BKZ1|ZN326_HUMAN DBIRD complex subunit ZNF326 OS=Homo sapiens OX=9606 GN=ZNF326 PE=1 SV=2	1	14	14	14	0	0	0	6	7	14	0	0	0	6	7	14	0	0	0	6	7	14	29.6	29.6	29.6	65.653	582	582	0	101.82	0	0	0	13.2	16.5	29.6	167020000	0	0	0	37191000	45212000
Q96NB3	Q96NB3	14	14	14	Zinc finger protein 830	ZNF830	sp|Q96NB3|ZN830_HUMAN Zinc finger protein 830 OS=Homo sapiens OX=9606 GN=ZNF830 PE=1 SV=2	1	14	14	14	0	0	0	4	11	11	0	0	0	4	11	11	0	0	0	4	11	11	46	46	46	41.998	372	372	0	108.92	0	0	0	20.2	44.4	33.1	166040000	0	0	0	27970000	59481000
Q9BU76	Q9BU76	9	9	9	Multiple myeloma tumor-associated protein 2	MMTAG2	sp|Q9BU76|MMTA2_HUMAN Multiple myeloma tumor-associated protein 2 OS=Homo sapiens OX=9606 GN=MMTAG2 PE=1 SV=1	1	9	9	9	0	0	0	7	8	9	0	0	0	7	8	9	0	0	0	7	8	9	37.3	37.3	37.3	29.411	263	263	0	44.411	0	0	0	28.9	33.8	37.3	161410000	0	0	0	31054000	52884000
Q9H8G2	Q9H8G2	6	6	6	Caspase activity and apoptosis inhibitor 1	CAAP1	sp|Q9H8G2|CAAP1_HUMAN Caspase activity and apoptosis inhibitor 1 OS=Homo sapiens OX=9606 GN=CAAP1 PE=1 SV=2	1	6	6	6	0	0	0	4	5	4	0	0	0	4	5	4	0	0	0	4	5	4	24.4	24.4	24.4	38.367	361	361	0	100.56	0	0	0	20.2	23.8	16.1	159840000	0	0	0	48894000	80029000
Q9H0G5	Q9H0G5	10	10	10	Nuclear speckle splicing regulatory protein 1	NSRP1	sp|Q9H0G5|NSRP1_HUMAN Nuclear speckle splicing regulatory protein 1 OS=Homo sapiens OX=9606 GN=NSRP1 PE=1 SV=1	1	10	10	10	0	0	0	7	8	8	0	0	0	7	8	8	0	0	0	7	8	8	17	17	17	66.389	558	558	0	66.663	0	0	0	15.2	15.2	17	159010000	0	0	0	38715000	53025000
Q06830;P32119	Q06830	14;1	14;1	12;1	Peroxiredoxin-1	PRDX1	sp|Q06830|PRDX1_HUMAN Peroxiredoxin-1 OS=Homo sapiens OX=9606 GN=PRDX1 PE=1 SV=1	2	14	14	12	1	1	0	5	10	9	1	1	0	5	10	9	1	1	0	4	8	8	61.3	61.3	61.3	22.11	199	199;198	0	42.715	9	9	0	42.7	48.7	51.3	161850000	1135200	2221500	0	27563000	49811000
Q96IZ7	Q96IZ7	7	7	7	Serine/Arginine-related protein 53	RSRC1	sp|Q96IZ7|RSRC1_HUMAN Serine/Arginine-related protein 53 OS=Homo sapiens OX=9606 GN=RSRC1 PE=1 SV=1	1	7	7	7	0	0	0	5	5	6	0	0	0	5	5	6	0	0	0	5	5	6	19.5	19.5	19.5	38.677	334	334	0	113.5	0	0	0	15	15	19.2	155180000	0	0	0	37072000	46835000
P06493	P06493	16	16	15	Cyclin-dependent kinase 1	CDK1	sp|P06493|CDK1_HUMAN Cyclin-dependent kinase 1 OS=Homo sapiens OX=9606 GN=CDK1 PE=1 SV=3	1	16	16	15	0	0	0	8	12	11	0	0	0	8	12	11	0	0	0	7	11	10	55.9	55.9	53.2	34.095	297	297	0	60.535	0	0	0	24.6	49.5	39.4	152360000	0	0	0	31443000	61778000
Q14151	Q14151	14	11	11	Scaffold attachment factor B2	SAFB2	sp|Q14151|SAFB2_HUMAN Scaffold attachment factor B2 OS=Homo sapiens OX=9606 GN=SAFB2 PE=1 SV=1	1	14	11	11	0	0	0	13	11	11	0	0	0	10	10	9	0	0	0	10	10	9	17.2	14.7	14.7	107.47	953	953	0	48.628	0	0	0	16.3	14.9	14.6	147990000	0	0	0	54875000	43112000
P23396	P23396	9	9	9	40S ribosomal protein S3	RPS3	sp|P23396|RS3_HUMAN 40S ribosomal protein S3 OS=Homo sapiens OX=9606 GN=RPS3 PE=1 SV=2	1	9	9	9	1	0	2	7	6	6	1	0	2	7	6	6	1	0	2	7	6	6	48.1	48.1	48.1	26.688	243	243	0	33.922	5.3	0	11.9	36.6	35.8	38.7	149640000	715140	0	2434900	30798000	63978000
Q8NI27	Q8NI27	11	11	11	THO complex subunit 2	THOC2	sp|Q8NI27|THOC2_HUMAN THO complex subunit 2 OS=Homo sapiens OX=9606 GN=THOC2 PE=1 SV=2	1	11	11	11	0	0	0	6	9	8	0	0	0	6	9	8	0	0	0	6	9	8	9.2	9.2	9.2	182.77	1593	1593	0	38.893	0	0	0	4.6	7.5	6.3	146010000	0	0	0	32893000	39059000
Q96BP3	Q96BP3	14	14	14	Peptidylprolyl isomerase domain and WD repeat-containing protein 1	PPWD1	sp|Q96BP3|PPWD1_HUMAN Peptidylprolyl isomerase domain and WD repeat-containing protein 1 OS=Homo sapiens OX=9606 GN=PPWD1 PE=1 SV=1	1	14	14	14	0	0	0	7	10	11	0	0	0	7	10	11	0	0	0	7	10	11	22.6	22.6	22.6	73.574	646	646	0	101.45	0	0	0	13.9	20.7	17.2	144540000	0	0	0	34200000	52070000
Q16778;P62807;P57053;P06899;O60814;Q99879;Q99877;P58876;P33778;Q99880;Q8N257;Q96A08;A0A2R8Y619	Q16778;P62807;P57053;P06899;O60814;Q99879;Q99877;P58876;P33778;Q99880	7;7;7;7;7;6;6;6;6;5;3;3;2	7;7;7;7;7;6;6;6;6;5;3;3;2	1;1;1;1;1;0;0;0;0;0;0;0;0	Histone H2B type 2-E;Histone H2B type 1-C/E/F/G/I;Histone H2B type F-S;Histone H2B type 1-J;Histone H2B type 1-K;Histone H2B type 1-M;Histone H2B type 1-N;Histone H2B type 1-D;Histone H2B type 1-B;Histone H2B type 1-L	HIST2H2BE;HIST1H2BC;H2BFS;HIST1H2BJ;HIST1H2BK;HIST1H2BM;HIST1H2BN;HIST1H2BD;HIST1H2BB;HIST1H2BL	sp|Q16778|H2B2E_HUMAN Histone H2B type 2-E OS=Homo sapiens OX=9606 GN=HIST2H2BE PE=1 SV=3;sp|P62807|H2B1C_HUMAN Histone H2B type 1-C/E/F/G/I OS=Homo sapiens OX=9606 GN=HIST1H2BI PE=1 SV=4;sp|P57053|H2BFS_HUMAN Histone H2B type F-S OS=Homo sapiens OX=9606 G	13	7	7	1	4	4	1	3	3	5	4	4	1	3	3	5	1	1	0	1	0	1	50	50	8.7	13.92	126	126;126;126;126;126;126;126;126;126;126;126;127;122	0	260.53	33.3	33.3	11.9	21.4	25.4	38.1	214420000	22057000	49961000	948620	56396000	56812000
Q6UX04	Q6UX04	14	14	14	Peptidyl-prolyl cis-trans isomerase CWC27 homolog	CWC27	sp|Q6UX04|CWC27_HUMAN Spliceosome-associated protein CWC27 homolog OS=Homo sapiens OX=9606 GN=CWC27 PE=1 SV=1	1	14	14	14	0	0	0	6	10	8	0	0	0	6	10	8	0	0	0	6	10	8	40	40	40	53.846	472	472	0	81.916	0	0	0	25.8	36.9	29.4	140710000	0	0	0	27876000	55953000
Q08170	Q08170	11	7	7	Serine/arginine-rich splicing factor 4	SRSF4	sp|Q08170|SRSF4_HUMAN Serine/arginine-rich splicing factor 4 OS=Homo sapiens OX=9606 GN=SRSF4 PE=1 SV=2	1	11	7	7	0	0	0	9	9	5	0	0	0	6	6	3	0	0	0	6	6	3	22.3	17.2	17.2	56.678	494	494	0	50.294	0	0	0	17.8	19.6	12.3	137880000	0	0	0	47032000	70751000
P27635;Q96L21	P27635	10;3	10;3	10;3	60S ribosomal protein L10	RPL10	sp|P27635|RL10_HUMAN 60S ribosomal protein L10 OS=Homo sapiens OX=9606 GN=RPL10 PE=1 SV=4	2	10	10	10	1	0	0	8	8	7	1	0	0	8	8	7	1	0	0	8	8	7	42.5	42.5	42.5	24.604	214	214;214	0	55.922	4.7	0	0	37.4	37.9	33.2	139040000	3197000	0	0	27260000	72531000
Q7L4I2	Q7L4I2	6	6	6	Arginine/serine-rich coiled-coil protein 2	RSRC2	sp|Q7L4I2|RSRC2_HUMAN Arginine/serine-rich coiled-coil protein 2 OS=Homo sapiens OX=9606 GN=RSRC2 PE=1 SV=1	1	6	6	6	0	0	0	5	6	5	0	0	0	5	6	5	0	0	0	5	6	5	14.3	14.3	14.3	50.559	434	434	0	40.128	0	0	0	14.1	14.3	14.1	135300000	0	0	0	31983000	47807000
Q15366;P57721	Q15366;P57721	10;5	6;1	6;1	Poly(rC)-binding protein 2;Poly(rC)-binding protein 3	PCBP2;PCBP3	sp|Q15366|PCBP2_HUMAN Poly(rC)-binding protein 2 OS=Homo sapiens OX=9606 GN=PCBP2 PE=1 SV=1;sp|P57721|PCBP3_HUMAN Poly(rC)-binding protein 3 OS=Homo sapiens OX=9606 GN=PCBP3 PE=2 SV=2	2	10	6	6	4	2	3	7	6	7	3	1	1	4	5	5	3	1	1	4	5	5	35.3	21.6	21.6	38.58	365	365;371	0	164.78	19.7	6.6	12.1	32.3	23.6	28.5	138910000	5312300	473810	524200	25516000	50248000
Q96I24	Q96I24	13	13	12	Far upstream element-binding protein 3	FUBP3	sp|Q96I24|FUBP3_HUMAN Far upstream element-binding protein 3 OS=Homo sapiens OX=9606 GN=FUBP3 PE=1 SV=2	1	13	13	12	0	0	0	9	8	10	0	0	0	9	8	10	0	0	0	8	7	9	31.5	31.5	29.9	61.64	572	572	0	72.405	0	0	0	19.8	21.5	23.1	129520000	0	0	0	38665000	40224000
Q07666;Q5VWX1	Q07666	7;1	7;1	7;1	KH domain-containing, RNA-binding, signal transduction-associated protein 1	KHDRBS1	sp|Q07666|KHDR1_HUMAN KH domain-containing, RNA-binding, signal transduction-associated protein 1 OS=Homo sapiens OX=9606 GN=KHDRBS1 PE=1 SV=1	2	7	7	7	0	0	0	6	6	6	0	0	0	6	6	6	0	0	0	6	6	6	22.1	22.1	22.1	48.227	443	443;349	0	20.54	0	0	0	19.6	19.6	13.1	128810000	0	0	0	36041000	51737000
Q9H5V9	Q9H5V9	10	10	10	UPF0428 protein CXorf56	CXorf56	sp|Q9H5V9|CX056_HUMAN UPF0428 protein CXorf56 OS=Homo sapiens OX=9606 GN=CXorf56 PE=1 SV=1	1	10	10	10	0	0	0	8	6	7	0	0	0	8	6	7	0	0	0	8	6	7	38.7	38.7	38.7	25.624	222	222	0	47.835	0	0	0	38.7	26.6	38.7	128550000	0	0	0	46451000	36827000
P52756	P52756	16	13	13	RNA-binding protein 5	RBM5	sp|P52756|RBM5_HUMAN RNA-binding protein 5 OS=Homo sapiens OX=9606 GN=RBM5 PE=1 SV=2	1	16	13	13	0	0	0	11	8	12	0	0	0	9	6	9	0	0	0	9	6	9	18.3	15.5	15.5	92.153	815	815	0	75.803	0	0	0	14.1	12.4	15	128220000	0	0	0	38251000	24303000
P46779	P46779	7	7	7	60S ribosomal protein L28	RPL28	sp|P46779|RL28_HUMAN 60S ribosomal protein L28 OS=Homo sapiens OX=9606 GN=RPL28 PE=1 SV=3	1	7	7	7	1	1	1	5	6	5	1	1	1	5	6	5	1	1	1	5	6	5	33.6	33.6	33.6	15.747	137	137	0	26.1	7.3	7.3	7.3	32.8	28.5	32.8	133850000	3288600	1534600	866040	37040000	64551000
Q96SB4	Q96SB4	10	10	9	SRSF protein kinase 1	SRPK1	sp|Q96SB4|SRPK1_HUMAN SRSF protein kinase 1 OS=Homo sapiens OX=9606 GN=SRPK1 PE=1 SV=2	1	10	10	9	0	0	0	5	9	7	0	0	0	5	9	7	0	0	0	5	8	7	22.6	22.6	21.4	74.324	655	655	0	64.893	0	0	0	15.3	21.7	16.2	125190000	0	0	0	28570000	58514000
Q9P2I0	Q9P2I0	15	15	15	Cleavage and polyadenylation specificity factor subunit 2	CPSF2	sp|Q9P2I0|CPSF2_HUMAN Cleavage and polyadenylation specificity factor subunit 2 OS=Homo sapiens OX=9606 GN=CPSF2 PE=1 SV=2	1	15	15	15	0	0	0	7	8	12	0	0	0	7	8	12	0	0	0	7	8	12	32.7	32.7	32.7	88.486	782	782	0	56.405	0	0	0	12.8	18.5	27.2	123480000	0	0	0	35555000	42895000
Q15233	Q15233	10	9	9	Non-POU domain-containing octamer-binding protein	NONO	sp|Q15233|NONO_HUMAN Non-POU domain-containing octamer-binding protein OS=Homo sapiens OX=9606 GN=NONO PE=1 SV=4	1	10	9	9	0	0	0	6	6	9	0	0	0	6	5	9	0	0	0	6	5	9	32.7	31	31	54.231	471	471	0	47.8	0	0	0	17	17.4	31	122650000	0	0	0	27723000	25740000
Q96AG4	Q96AG4	11	11	11	Leucine-rich repeat-containing protein 59	LRRC59	sp|Q96AG4|LRC59_HUMAN Leucine-rich repeat-containing protein 59 OS=Homo sapiens OX=9606 GN=LRRC59 PE=1 SV=1	1	11	11	11	3	1	0	6	8	7	3	1	0	6	8	7	3	1	0	6	8	7	32.9	32.9	32.9	34.93	307	307	0	68.13	11.4	3.9	0	24.8	29.6	28	122880000	1007100	745020	0	39084000	38320000
Q13243	Q13243	13	12	12	Serine/arginine-rich splicing factor 5	SRSF5	sp|Q13243|SRSF5_HUMAN Serine/arginine-rich splicing factor 5 OS=Homo sapiens OX=9606 GN=SRSF5 PE=1 SV=1	1	13	12	12	0	0	0	9	9	6	0	0	0	8	8	5	0	0	0	8	8	5	42.6	39.3	39.3	31.263	272	272	0	42.26	0	0	0	28.3	38.6	27.6	120350000	0	0	0	38908000	54082000
P60660;P14649	P60660	8;3	8;3	8;3	Myosin light polypeptide 6	MYL6	sp|P60660|MYL6_HUMAN Myosin light polypeptide 6 OS=Homo sapiens OX=9606 GN=MYL6 PE=1 SV=2	2	8	8	8	7	4	3	4	6	4	7	4	3	4	6	4	7	4	3	4	6	4	61.6	61.6	61.6	16.93	151	151;208	0	132.15	61.6	34.4	39.7	42.4	61.6	36.4	186900000	33521000	12836000	21332000	23586000	65951000
Q6NZY4	Q6NZY4	10	10	10	Zinc finger CCHC domain-containing protein 8	ZCCHC8	sp|Q6NZY4|ZCHC8_HUMAN Zinc finger CCHC domain-containing protein 8 OS=Homo sapiens OX=9606 GN=ZCCHC8 PE=1 SV=2	1	10	10	10	0	0	0	8	8	9	0	0	0	8	8	9	0	0	0	8	8	9	19	19	19	78.576	707	707	0	73.952	0	0	0	17	13.7	14.9	118670000	0	0	0	48405000	34774000
P13994	P13994	9	9	9	Coiled-coil domain-containing protein 130	CCDC130	sp|P13994|CC130_HUMAN Coiled-coil domain-containing protein 130 OS=Homo sapiens OX=9606 GN=CCDC130 PE=1 SV=2	1	9	9	9	0	0	0	6	7	6	0	0	0	6	7	6	0	0	0	6	7	6	23.2	23.2	23.2	44.802	396	396	0	33.652	0	0	0	16.7	21.5	16.7	118600000	0	0	0	31815000	45744000
Q96I25	Q96I25	8	8	8	Splicing factor 45	RBM17	sp|Q96I25|SPF45_HUMAN Splicing factor 45 OS=Homo sapiens OX=9606 GN=RBM17 PE=1 SV=1	1	8	8	8	0	0	0	7	7	8	0	0	0	7	7	8	0	0	0	7	7	8	12	12	12	44.961	401	401	0	66.416	0	0	0	12	12	12	118150000	0	0	0	32317000	28422000
Q15428	Q15428	7	7	7	Splicing factor 3A subunit 2	SF3A2	sp|Q15428|SF3A2_HUMAN Splicing factor 3A subunit 2 OS=Homo sapiens OX=9606 GN=SF3A2 PE=1 SV=2	1	7	7	7	0	0	0	3	6	5	0	0	0	3	6	5	0	0	0	3	6	5	22.8	22.8	22.8	49.255	464	464	0	53.217	0	0	0	9.9	22.8	12.9	117390000	0	0	0	10907000	59567000
O43447	O43447	9	9	9	Peptidyl-prolyl cis-trans isomerase H	PPIH	sp|O43447|PPIH_HUMAN Peptidyl-prolyl cis-trans isomerase H OS=Homo sapiens OX=9606 GN=PPIH PE=1 SV=1	1	9	9	9	0	0	0	5	4	7	0	0	0	5	4	7	0	0	0	5	4	7	68.9	68.9	68.9	19.208	177	177	0	36.101	0	0	0	40.7	33.3	53.7	116010000	0	0	0	30094000	34286000
O43809	O43809	5	5	5	Cleavage and polyadenylation specificity factor subunit 5	NUDT21	sp|O43809|CPSF5_HUMAN Cleavage and polyadenylation specificity factor subunit 5 OS=Homo sapiens OX=9606 GN=NUDT21 PE=1 SV=1	1	5	5	5	0	0	0	4	5	3	0	0	0	4	5	3	0	0	0	4	5	3	25.6	25.6	25.6	26.227	227	227	0	64.072	0	0	0	25.1	25.6	25.1	115060000	0	0	0	35026000	33807000
P61254;Q9UNX3	P61254;Q9UNX3	8;7	8;7	8;7	60S ribosomal protein L26;60S ribosomal protein L26-like 1	RPL26;RPL26L1	sp|P61254|RL26_HUMAN 60S ribosomal protein L26 OS=Homo sapiens OX=9606 GN=RPL26 PE=1 SV=1;sp|Q9UNX3|RL26L_HUMAN 60S ribosomal protein L26-like 1 OS=Homo sapiens OX=9606 GN=RPL26L1 PE=1 SV=1	2	8	8	8	0	0	0	6	7	5	0	0	0	6	7	5	0	0	0	6	7	5	33.1	33.1	33.1	17.258	145	145;145	0	20.707	0	0	0	33.1	32.4	26.2	114850000	0	0	0	31131000	46813000
Q9NZI8;Q9Y6M1	Q9NZI8	14;1	14;1	12;0	Insulin-like growth factor 2 mRNA-binding protein 1	IGF2BP1	sp|Q9NZI8|IF2B1_HUMAN Insulin-like growth factor 2 mRNA-binding protein 1 OS=Homo sapiens OX=9606 GN=IGF2BP1 PE=1 SV=2	2	14	14	12	2	1	1	6	11	9	2	1	1	6	11	9	1	0	1	6	9	8	28.9	28.9	26.7	63.48	577	577;599	0	77.073	4.7	2.3	3.5	14.7	23.4	22.7	115370000	681450	671340	1004300	29446000	48536000
Q66PJ3	Q66PJ3	7	7	7	ADP-ribosylation factor-like protein 6-interacting protein 4	ARL6IP4	sp|Q66PJ3|AR6P4_HUMAN ADP-ribosylation factor-like protein 6-interacting protein 4 OS=Homo sapiens OX=9606 GN=ARL6IP4 PE=1 SV=2	1	7	7	7	0	0	0	5	6	6	0	0	0	5	6	6	0	0	0	5	6	6	15	15	15	44.915	421	421	0	68.746	0	0	0	11.4	15	11.4	110630000	0	0	0	27804000	38527000
P62906	P62906	9	9	9	60S ribosomal protein L10a	RPL10A	sp|P62906|RL10A_HUMAN 60S ribosomal protein L10a OS=Homo sapiens OX=9606 GN=RPL10A PE=1 SV=2	1	9	9	9	0	0	0	6	9	4	0	0	0	6	9	4	0	0	0	6	9	4	36.4	36.4	36.4	24.831	217	217	0	44.123	0	0	0	30.9	36.4	26.7	110300000	0	0	0	17529000	63217000
Q9NW82	Q9NW82	13	13	13	WD repeat-containing protein 70	WDR70	sp|Q9NW82|WDR70_HUMAN WD repeat-containing protein 70 OS=Homo sapiens OX=9606 GN=WDR70 PE=1 SV=1	1	13	13	13	0	0	0	8	8	11	0	0	0	8	8	11	0	0	0	8	8	11	24.9	24.9	24.9	73.2	654	654	0	79.803	0	0	0	17.3	13.1	22.9	110210000	0	0	0	27912000	26267000
P62304	P62304	2	2	2	Small nuclear ribonucleoprotein E	SNRPE	sp|P62304|RUXE_HUMAN Small nuclear ribonucleoprotein E OS=Homo sapiens OX=9606 GN=SNRPE PE=1 SV=1	1	2	2	2	0	0	0	2	2	2	0	0	0	2	2	2	0	0	0	2	2	2	29.3	29.3	29.3	10.803	92	92	0	12.547	0	0	0	29.3	29.3	29.3	110100000	0	0	0	44202000	42218000
P32969	P32969	6	6	6	60S ribosomal protein L9	RPL9	sp|P32969|RL9_HUMAN 60S ribosomal protein L9 OS=Homo sapiens OX=9606 GN=RPL9P9 PE=1 SV=1	1	6	6	6	2	1	1	3	3	5	2	1	1	3	3	5	2	1	1	3	3	5	54.7	54.7	54.7	21.863	192	192	0	72.256	31.2	9.9	9.9	21.9	21.9	33.3	124430000	9856700	2667600	2411600	33358000	38583000
Q96J01	Q96J01	3	3	3	THO complex subunit 3	THOC3	sp|Q96J01|THOC3_HUMAN THO complex subunit 3 OS=Homo sapiens OX=9606 GN=THOC3 PE=1 SV=1	1	3	3	3	0	0	0	3	3	2	0	0	0	3	3	2	0	0	0	3	3	2	14.2	14.2	14.2	38.771	351	351	0	32.087	0	0	0	14.2	14.2	12	105010000	0	0	0	25609000	45326000
Q9BTD8	Q9BTD8	8	8	8	RNA-binding protein 42	RBM42	sp|Q9BTD8|RBM42_HUMAN RNA-binding protein 42 OS=Homo sapiens OX=9606 GN=RBM42 PE=1 SV=1	1	8	8	8	0	0	0	5	4	6	0	0	0	5	4	6	0	0	0	5	4	6	29.2	29.2	29.2	50.413	480	480	0	42.143	0	0	0	16.9	20	23.1	101900000	0	0	0	27576000	28676000
P21127;Q9UQ88;Q13882	P21127;Q9UQ88	9;8;1	9;8;1	9;8;1	Cyclin-dependent kinase 11B;Cyclin-dependent kinase 11A	CDK11B;CDK11A	sp|P21127|CD11B_HUMAN Cyclin-dependent kinase 11B OS=Homo sapiens OX=9606 GN=CDK11B PE=1 SV=4;sp|Q9UQ88|CD11A_HUMAN Cyclin-dependent kinase 11A OS=Homo sapiens OX=9606 GN=CDK11A PE=1 SV=4	3	9	9	9	0	0	0	4	8	5	0	0	0	4	8	5	0	0	0	4	8	5	15.1	15.1	15.1	92.619	795	795;783;451	0	115.59	0	0	0	8.4	13.5	8.4	101520000	0	0	0	25119000	45240000
P09234	P09234	2	2	2	U1 small nuclear ribonucleoprotein C	SNRPC	sp|P09234|RU1C_HUMAN U1 small nuclear ribonucleoprotein C OS=Homo sapiens OX=9606 GN=SNRPC PE=1 SV=1	1	2	2	2	1	1	0	1	2	2	1	1	0	1	2	2	1	1	0	1	2	2	25.8	25.8	25.8	17.394	159	159	0	92.215	12.6	12.6	0	12.6	25.8	25.8	102830000	896010	1018800	0	26689000	20223000
P67809;Q9Y2T7	P67809	7;1	7;1	5;0	Nuclease-sensitive element-binding protein 1	YBX1	sp|P67809|YBOX1_HUMAN Nuclease-sensitive element-binding protein 1 OS=Homo sapiens OX=9606 GN=YBX1 PE=1 SV=3	2	7	7	5	0	0	0	3	5	6	0	0	0	3	5	6	0	0	0	3	5	4	46	46	35.5	35.924	324	324;364	0	153.01	0	0	0	24.4	35.5	40.7	100220000	0	0	0	18530000	43738000
Q9Y421	Q9Y421	7	7	7	Protein FAM32A	FAM32A	sp|Q9Y421|FA32A_HUMAN Protein FAM32A OS=Homo sapiens OX=9606 GN=FAM32A PE=1 SV=2	1	7	7	7	0	0	0	4	5	4	0	0	0	4	5	4	0	0	0	4	5	4	46.4	46.4	46.4	13.178	112	112	0	46.656	0	0	0	21.4	33.9	25.9	100130000	0	0	0	25610000	27446000
P49458	P49458	3	3	3	Signal recognition particle 9 kDa protein	SRP9	sp|P49458|SRP09_HUMAN Signal recognition particle 9 kDa protein OS=Homo sapiens OX=9606 GN=SRP9 PE=1 SV=2	1	3	3	3	0	0	0	3	3	3	0	0	0	3	3	3	0	0	0	3	3	3	51.2	51.2	51.2	10.112	86	86	0	20.409	0	0	0	51.2	51.2	51.2	98478000	0	0	0	27761000	41502000
Q13356	Q13356	7	7	7	Peptidyl-prolyl cis-trans isomerase-like 2	PPIL2	sp|Q13356|PPIL2_HUMAN RING-type E3 ubiquitin-protein ligase PPIL2 OS=Homo sapiens OX=9606 GN=PPIL2 PE=1 SV=1	1	7	7	7	0	0	0	6	7	6	0	0	0	6	7	6	0	0	0	6	7	6	14	14	14	58.823	520	520	0	30.187	0	0	0	13.7	14	12.1	97915000	0	0	0	20505000	35565000
P62249	P62249	9	9	9	40S ribosomal protein S16	RPS16	sp|P62249|RS16_HUMAN 40S ribosomal protein S16 OS=Homo sapiens OX=9606 GN=RPS16 PE=1 SV=2	1	9	9	9	0	1	1	5	6	6	0	1	1	5	6	6	0	1	1	5	6	6	39.7	39.7	39.7	16.445	146	146	0	52.432	0	9.6	9.6	24	37	31.5	99403000	0	0	2398100	12554000	28512000
P46777	P46777	10	10	10	60S ribosomal protein L5	RPL5	sp|P46777|RL5_HUMAN 60S ribosomal protein L5 OS=Homo sapiens OX=9606 GN=RPL5 PE=1 SV=3	1	10	10	10	0	0	0	6	9	7	0	0	0	6	9	7	0	0	0	6	9	7	36.4	36.4	36.4	34.362	297	297	0	43.691	0	0	0	31.3	36.4	31.3	96967000	0	0	0	27819000	34675000
P62888	P62888	4	4	4	60S ribosomal protein L30	RPL30	sp|P62888|RL30_HUMAN 60S ribosomal protein L30 OS=Homo sapiens OX=9606 GN=RPL30 PE=1 SV=2	1	4	4	4	1	0	1	3	4	3	1	0	1	3	4	3	1	0	1	3	4	3	34.8	34.8	34.8	12.784	115	115	0	24.874	10.4	0	10.4	34.8	34.8	34.8	97596000	915160	0	858870	17339000	57064000
Q01844	Q01844	4	4	4	RNA-binding protein EWS	EWSR1	sp|Q01844|EWS_HUMAN RNA-binding protein EWS OS=Homo sapiens OX=9606 GN=EWSR1 PE=1 SV=1	1	4	4	4	0	0	0	2	4	3	0	0	0	2	4	3	0	0	0	2	4	3	6.6	6.6	6.6	68.477	656	656	0	41.185	0	0	0	4	6.6	6.2	94623000	0	0	0	22178000	22717000
P27348	P27348	6	6	5	14-3-3 protein theta	YWHAQ	sp|P27348|1433T_HUMAN 14-3-3 protein theta OS=Homo sapiens OX=9606 GN=YWHAQ PE=1 SV=1	1	6	6	5	0	0	0	4	4	5	0	0	0	4	4	5	0	0	0	3	3	5	22.4	22.4	22.4	27.764	245	245	0	26.297	0	0	0	19.2	13.5	22.4	94620000	0	0	0	25045000	29186000
Q8IWZ8	Q8IWZ8	12	12	12	SURP and G-patch domain-containing protein 1	SUGP1	sp|Q8IWZ8|SUGP1_HUMAN SURP and G-patch domain-containing protein 1 OS=Homo sapiens OX=9606 GN=SUGP1 PE=1 SV=2	1	12	12	12	0	0	0	8	6	10	0	0	0	8	6	10	0	0	0	8	6	10	29.6	29.6	29.6	72.47	645	645	0	36.407	0	0	0	16.6	15.7	25.6	93859000	0	0	0	28019000	28471000
P05387	P05387	6	6	5	60S acidic ribosomal protein P2	RPLP2	sp|P05387|RLA2_HUMAN 60S acidic ribosomal protein P2 OS=Homo sapiens OX=9606 GN=RPLP2 PE=1 SV=1	1	6	6	5	3	1	0	5	5	5	3	1	0	5	5	5	3	1	0	4	5	4	86.1	86.1	71.3	11.665	115	115	0	66.4	57.4	10.4	0	72.2	71.3	75.7	98908000	5027300	647490	0	19358000	45251000
Q9H9J4	Q9H9J4	10	10	10	Ubiquitin carboxyl-terminal hydrolase 42	USP42	sp|Q9H9J4|UBP42_HUMAN Ubiquitin carboxyl-terminal hydrolase 42 OS=Homo sapiens OX=9606 GN=USP42 PE=1 SV=3	1	10	10	10	0	0	0	7	5	7	0	0	0	7	5	7	0	0	0	7	5	7	6.7	6.7	6.7	145.39	1324	1324	0	61.719	0	0	0	5.4	4.9	6.7	92761000	0	0	0	30273000	26357000
Q08211	Q08211	12	12	12	ATP-dependent RNA helicase A	DHX9	sp|Q08211|DHX9_HUMAN ATP-dependent RNA helicase A OS=Homo sapiens OX=9606 GN=DHX9 PE=1 SV=4	1	12	12	12	1	0	0	7	9	8	1	0	0	7	9	8	1	0	0	7	9	8	9.5	9.5	9.5	140.96	1270	1270	0	67.863	0.9	0	0	7.6	9.4	8.2	93437000	982660	0	0	23923000	35445000
P47914	P47914	3	3	3	60S ribosomal protein L29	RPL29	sp|P47914|RL29_HUMAN 60S ribosomal protein L29 OS=Homo sapiens OX=9606 GN=RPL29 PE=1 SV=2	1	3	3	3	1	1	1	1	2	2	1	1	1	1	2	2	1	1	1	1	2	2	21.4	21.4	21.4	17.752	159	159	0	12.365	9.4	9.4	9.4	9.4	17.6	13.2	110570000	6627800	5865200	5748100	19600000	35740000
Q02543	Q02543	7	7	7	60S ribosomal protein L18a	RPL18A	sp|Q02543|RL18A_HUMAN 60S ribosomal protein L18a OS=Homo sapiens OX=9606 GN=RPL18A PE=1 SV=2	1	7	7	7	2	1	2	3	6	2	2	1	2	3	6	2	2	1	2	3	6	2	42	42	42	20.762	176	176	0	23.441	15.3	7.4	10.2	22.2	37.5	10.2	99615000	3776600	1180900	3668100	16152000	51871000
Q9NYV4;Q00535;P24941;P11802;Q00526;Q00534;P50750;Q96Q40;O94921;Q07002;Q00536;Q00537	Q9NYV4	11;1;1;1;1;1;1;1;1;1;1;1	10;0;0;0;0;0;0;0;0;0;0;0	9;0;0;0;0;0;0;0;0;0;0;0	Cyclin-dependent kinase 12	CDK12	sp|Q9NYV4|CDK12_HUMAN Cyclin-dependent kinase 12 OS=Homo sapiens OX=9606 GN=CDK12 PE=1 SV=2	12	11	10	9	0	0	0	8	8	8	0	0	0	7	7	7	0	0	0	7	6	6	12.6	12.1	10.7	164.15	1490	1490;292;298;303;305;326;372;435;469;474;496;523	0	41.357	0	0	0	7.7	10.1	11.3	90890000	0	0	0	21396000	28174000
Q9Y2W2	Q9Y2W2	11	11	11	WW domain-binding protein 11	WBP11	sp|Q9Y2W2|WBP11_HUMAN WW domain-binding protein 11 OS=Homo sapiens OX=9606 GN=WBP11 PE=1 SV=1	1	11	11	11	0	0	0	8	6	10	0	0	0	8	6	10	0	0	0	8	6	10	18.9	18.9	18.9	69.997	641	641	0	36.208	0	0	0	15	11.9	16.7	88071000	0	0	0	23371000	16942000
P62854;Q5JNZ5	P62854	3;1	3;1	3;1	40S ribosomal protein S26	RPS26	sp|P62854|RS26_HUMAN 40S ribosomal protein S26 OS=Homo sapiens OX=9606 GN=RPS26 PE=1 SV=3	2	3	3	3	1	1	2	3	3	2	1	1	2	3	3	2	1	1	2	3	3	2	20.9	20.9	20.9	13.015	115	115;115	0	70.259	13	13	20.9	20.9	20.9	20.9	95249000	1889100	2315600	7722900	23664000	51864000
A0A2R8Y422;P62979	A0A2R8Y422;P62979	2;2	2;2	2;2	Ubiquitin-40S ribosomal protein S27a;Ubiquitin;40S ribosomal protein S27a	RPS27A	tr|A0A2R8Y422|A0A2R8Y422_HUMAN Uncharacterized protein OS=Homo sapiens OX=9606 PE=4 SV=1;sp|P62979|RS27A_HUMAN Ubiquitin-40S ribosomal protein S27a OS=Homo sapiens OX=9606 GN=RPS27A PE=1 SV=2	2	2	2	2	0	0	0	1	2	2	0	0	0	1	2	2	0	0	0	1	2	2	20.5	20.5	20.5	17.967	156	156;156	0	25.353	0	0	0	8.3	20.5	20.5	82520000	0	0	0	23320000	36881000
Q9H5Z1	Q9H5Z1	9	9	9	Probable ATP-dependent RNA helicase DHX35	DHX35	sp|Q9H5Z1|DHX35_HUMAN Probable ATP-dependent RNA helicase DHX35 OS=Homo sapiens OX=9606 GN=DHX35 PE=1 SV=2	1	9	9	9	0	0	0	5	8	3	0	0	0	5	8	3	0	0	0	5	8	3	21.9	21.9	21.9	78.909	703	703	0	56.658	0	0	0	12.9	20.3	7	81711000	0	0	0	16338000	56079000
Q9BRX9	Q9BRX9	8	8	8	WD repeat domain-containing protein 83	WDR83	sp|Q9BRX9|WDR83_HUMAN WD repeat domain-containing protein 83 OS=Homo sapiens OX=9606 GN=WDR83 PE=1 SV=1	1	8	8	8	0	0	0	7	6	4	0	0	0	7	6	4	0	0	0	7	6	4	35.6	35.6	35.6	34.342	315	315	0	32.124	0	0	0	35.6	23.2	22.9	79646000	0	0	0	30185000	31836000
Q9P258	Q9P258	12	12	12	Protein RCC2	RCC2	sp|Q9P258|RCC2_HUMAN Protein RCC2 OS=Homo sapiens OX=9606 GN=RCC2 PE=1 SV=2	1	12	12	12	0	0	0	8	9	9	0	0	0	8	9	9	0	0	0	8	9	9	38.7	38.7	38.7	56.084	522	522	0	47.974	0	0	0	24.9	28.2	28.5	79516000	0	0	0	23592000	26761000
Q8IWX8	Q8IWX8	12	12	12	Calcium homeostasis endoplasmic reticulum protein	CHERP	sp|Q8IWX8|CHERP_HUMAN Calcium homeostasis endoplasmic reticulum protein OS=Homo sapiens OX=9606 GN=CHERP PE=1 SV=3	1	12	12	12	0	0	0	5	7	10	0	0	0	5	7	10	0	0	0	5	7	10	14.6	14.6	14.6	103.7	916	916	0	37.551	0	0	0	7.2	9.7	11.6	79356000	0	0	0	12553000	29324000
Q5HYJ3	Q5HYJ3	6	6	5	Protein FAM76B	FAM76B	sp|Q5HYJ3|FA76B_HUMAN Protein FAM76B OS=Homo sapiens OX=9606 GN=FAM76B PE=1 SV=3	1	6	6	5	0	0	0	3	4	4	0	0	0	3	4	4	0	0	0	3	4	3	21.5	21.5	18	38.708	339	339	0	17.774	0	0	0	11.8	16.5	13.9	79198000	0	0	0	15414000	26023000
Q06787	Q06787	5	4	4	Fragile X mental retardation protein 1	FMR1	sp|Q06787|FMR1_HUMAN Synaptic functional regulator FMR1 OS=Homo sapiens OX=9606 GN=FMR1 PE=1 SV=1	1	5	4	4	0	0	0	3	4	4	0	0	0	2	3	3	0	0	0	2	3	3	13	11.7	11.7	71.174	632	632	0	43.445	0	0	0	7.9	10.1	10.8	79128000	0	0	0	9771800	52065000
Q9Y580	Q9Y580	6	6	6	RNA-binding protein 7	RBM7	sp|Q9Y580|RBM7_HUMAN RNA-binding protein 7 OS=Homo sapiens OX=9606 GN=RBM7 PE=1 SV=1	1	6	6	6	0	0	0	5	4	3	0	0	0	5	4	3	0	0	0	5	4	3	35	35	35	30.503	266	266	0	133.75	0	0	0	31.2	24.4	20.7	78078000	0	0	0	20971000	29462000
P63173	P63173	4	4	4	60S ribosomal protein L38	RPL38	sp|P63173|RL38_HUMAN 60S ribosomal protein L38 OS=Homo sapiens OX=9606 GN=RPL38 PE=1 SV=2	1	4	4	4	0	0	0	4	3	3	0	0	0	4	3	3	0	0	0	4	3	3	58.6	58.6	58.6	8.2178	70	70	0	22.092	0	0	0	58.6	54.3	58.6	78056000	0	0	0	33204000	25601000
Q7Z2W4	Q7Z2W4	10	10	10	Zinc finger CCCH-type antiviral protein 1	ZC3HAV1	sp|Q7Z2W4|ZCCHV_HUMAN Zinc finger CCCH-type antiviral protein 1 OS=Homo sapiens OX=9606 GN=ZC3HAV1 PE=1 SV=3	1	10	10	10	0	0	0	4	7	7	0	0	0	4	7	7	0	0	0	4	7	7	19	19	19	101.43	902	902	0	51.159	0	0	0	7.4	10.8	13.9	77993000	0	0	0	18610000	26661000
Q13263	Q13263	5	5	5	Transcription intermediary factor 1-beta	TRIM28	sp|Q13263|TIF1B_HUMAN Transcription intermediary factor 1-beta OS=Homo sapiens OX=9606 GN=TRIM28 PE=1 SV=5	1	5	5	5	3	1	1	3	3	5	3	1	1	3	3	5	3	1	1	3	3	5	12.9	12.9	12.9	88.549	835	835	0	129.82	6.2	3.7	3.7	10.1	10.1	12.9	100440000	7767900	6357100	8453300	25569000	27434000
Q86U42	Q86U42	6	6	6	Polyadenylate-binding protein 2	PABPN1	sp|Q86U42|PABP2_HUMAN Polyadenylate-binding protein 2 OS=Homo sapiens OX=9606 GN=PABPN1 PE=1 SV=3	1	6	6	6	0	0	1	3	3	4	0	0	1	3	3	4	0	0	1	3	3	4	40.2	40.2	40.2	32.749	306	306	0	39.854	0	0	5.2	25.2	19	26.5	77392000	0	0	0	23543000	26954000
Q75N03	Q75N03	5	5	5	E3 ubiquitin-protein ligase Hakai	CBLL1	sp|Q75N03|HAKAI_HUMAN E3 ubiquitin-protein ligase Hakai OS=Homo sapiens OX=9606 GN=CBLL1 PE=1 SV=1	1	5	5	5	0	0	0	3	4	5	0	0	0	3	4	5	0	0	0	3	4	5	13.2	13.2	13.2	54.519	491	491	0	53.896	0	0	0	10.4	10.6	13.2	77248000	0	0	0	14038000	18264000
Q8WUA2	Q8WUA2	8	8	8	Peptidyl-prolyl cis-trans isomerase-like 4	PPIL4	sp|Q8WUA2|PPIL4_HUMAN Peptidyl-prolyl cis-trans isomerase-like 4 OS=Homo sapiens OX=9606 GN=PPIL4 PE=1 SV=1	1	8	8	8	0	0	0	6	6	7	0	0	0	6	6	7	0	0	0	6	6	7	21.5	21.5	21.5	57.224	492	492	0	65.428	0	0	0	18.1	16.3	16.7	77230000	0	0	0	20638000	33146000
P40429;Q6NVV1	P40429;Q6NVV1	8;4	8;4	8;4	60S ribosomal protein L13a;Putative 60S ribosomal protein L13a protein RPL13AP3	RPL13A;RPL13AP3	sp|P40429|RL13A_HUMAN 60S ribosomal protein L13a OS=Homo sapiens OX=9606 GN=RPL13A PE=1 SV=2;sp|Q6NVV1|R13P3_HUMAN Putative 60S ribosomal protein L13a protein RPL13AP3 OS=Homo sapiens OX=9606 GN=RPL13AP3 PE=5 SV=1	2	8	8	8	3	1	2	7	8	2	3	1	2	7	8	2	3	1	2	7	8	2	36.5	36.5	36.5	23.577	203	203;102	0	22.371	15.3	5.4	11.3	36.5	36.5	12.8	81957000	2485500	700380	1758300	17685000	54048000
P62847	P62847	5	5	5	40S ribosomal protein S24	RPS24	sp|P62847|RS24_HUMAN 40S ribosomal protein S24 OS=Homo sapiens OX=9606 GN=RPS24 PE=1 SV=1	1	5	5	5	1	0	1	4	3	3	1	0	1	4	3	3	1	0	1	4	3	3	36.8	36.8	36.8	15.423	133	133	0	12.687	6	0	6	28.6	25.6	25.6	79964000	2108200	0	1483900	20064000	36527000
Q13151	Q13151	10	10	10	Heterogeneous nuclear ribonucleoprotein A0	HNRNPA0	sp|Q13151|ROA0_HUMAN Heterogeneous nuclear ribonucleoprotein A0 OS=Homo sapiens OX=9606 GN=HNRNPA0 PE=1 SV=1	1	10	10	10	1	1	1	6	5	6	1	1	1	6	5	6	1	1	1	6	5	6	39	39	39	30.84	305	305	0	128.52	12.1	12.1	12.1	35.7	31.8	29.5	108190000	15644000	9183500	7243500	21596000	22157000
P61353	P61353	4	4	4	60S ribosomal protein L27	RPL27	sp|P61353|RL27_HUMAN 60S ribosomal protein L27 OS=Homo sapiens OX=9606 GN=RPL27 PE=1 SV=2	1	4	4	4	0	0	0	3	4	3	0	0	0	3	4	3	0	0	0	3	4	3	35.3	35.3	35.3	15.798	136	136	0	8.1298	0	0	0	30.1	35.3	30.1	75322000	0	0	0	20851000	42236000
Q9H0D6	Q9H0D6	9	9	9	5-3 exoribonuclease 2	XRN2	sp|Q9H0D6|XRN2_HUMAN 5-3 exoribonuclease 2 OS=Homo sapiens OX=9606 GN=XRN2 PE=1 SV=1	1	9	9	9	0	0	0	5	6	7	0	0	0	5	6	7	0	0	0	5	6	7	12.8	12.8	12.8	108.58	950	950	0	47.196	0	0	0	8.3	8.4	10.7	74532000	0	0	0	15127000	28420000
Q9P1Y6	Q9P1Y6	15	15	15	PHD and RING finger domain-containing protein 1	PHRF1	sp|Q9P1Y6|PHRF1_HUMAN PHD and RING finger domain-containing protein 1 OS=Homo sapiens OX=9606 GN=PHRF1 PE=1 SV=3	1	15	15	15	0	0	0	11	8	10	0	0	0	11	8	10	0	0	0	11	8	10	14.1	14.1	14.1	178.66	1649	1649	0	63.56	0	0	0	11.6	9	9	74466000	0	0	0	25743000	20509000
Q8NAV1	Q8NAV1	8	8	8	Pre-mRNA-splicing factor 38A	PRPF38A	sp|Q8NAV1|PR38A_HUMAN Pre-mRNA-splicing factor 38A OS=Homo sapiens OX=9606 GN=PRPF38A PE=1 SV=1	1	8	8	8	0	0	0	4	5	6	0	0	0	4	5	6	0	0	0	4	5	6	35.3	35.3	35.3	37.476	312	312	0	43.939	0	0	0	26.3	15.4	34	74262000	0	0	0	14897000	22397000
Q9Y3U8	Q9Y3U8	6	6	6	60S ribosomal protein L36	RPL36	sp|Q9Y3U8|RL36_HUMAN 60S ribosomal protein L36 OS=Homo sapiens OX=9606 GN=RPL36 PE=1 SV=3	1	6	6	6	0	0	0	4	6	3	0	0	0	4	6	3	0	0	0	4	6	3	38.1	38.1	38.1	12.254	105	105	0	17.521	0	0	0	26.7	38.1	22.9	73997000	0	0	0	16869000	34498000
P62266	P62266	8	8	8	40S ribosomal protein S23	RPS23	sp|P62266|RS23_HUMAN 40S ribosomal protein S23 OS=Homo sapiens OX=9606 GN=RPS23 PE=1 SV=3	1	8	8	8	2	1	2	3	5	2	2	1	2	3	5	2	2	1	2	3	5	2	57.3	57.3	57.3	15.807	143	143	0	75.455	20.3	20.3	20.3	35.7	37.8	21	98159000	14043000	2565700	7624200	35560000	30471000
P25705	P25705	8	8	8	ATP synthase subunit alpha, mitochondrial	ATP5A1	sp|P25705|ATPA_HUMAN ATP synthase subunit alpha, mitochondrial OS=Homo sapiens OX=9606 GN=ATP5F1A PE=1 SV=1	1	8	8	8	4	3	3	7	7	5	4	3	3	7	7	5	4	3	3	7	7	5	16.6	16.6	16.6	59.75	553	553	0	42.973	9.4	7.4	7.8	14.5	14.5	11.6	85653000	5970500	2815900	2964300	24066000	28671000
P62899	P62899	5	5	5	60S ribosomal protein L31	RPL31	sp|P62899|RL31_HUMAN 60S ribosomal protein L31 OS=Homo sapiens OX=9606 GN=RPL31 PE=1 SV=1	1	5	5	5	0	0	1	3	4	3	0	0	1	3	4	3	0	0	1	3	4	3	44	44	44	14.463	125	125	0	14.457	0	0	11.2	28.8	33.6	26.4	73381000	0	0	654720	10040000	42665000
Q8N9Q2	Q8N9Q2	3	3	3	Protein SREK1IP1	SREK1IP1	sp|Q8N9Q2|SR1IP_HUMAN Protein SREK1IP1 OS=Homo sapiens OX=9606 GN=SREK1IP1 PE=1 SV=1	1	3	3	3	0	0	0	2	2	3	0	0	0	2	2	3	0	0	0	2	2	3	15.5	15.5	15.5	18.177	155	155	0	14.409	0	0	0	14.8	14.8	15.5	72148000	0	0	0	22713000	17948000
Q8N3X1	Q8N3X1	7	7	7	Formin-binding protein 4	FNBP4	sp|Q8N3X1|FNBP4_HUMAN Formin-binding protein 4 OS=Homo sapiens OX=9606 GN=FNBP4 PE=1 SV=3	1	7	7	7	0	0	0	4	5	6	0	0	0	4	5	6	0	0	0	4	5	6	9.8	9.8	9.8	110.26	1017	1017	0	71.476	0	0	0	5.6	7.1	9.8	72027000	0	0	0	15550000	21520000
O15541	O15541	8	8	8	RING finger protein 113A	RNF113A	sp|O15541|R113A_HUMAN E3 ubiquitin-protein ligase RNF113A OS=Homo sapiens OX=9606 GN=RNF113A PE=1 SV=1	1	8	8	8	0	0	0	5	5	7	0	0	0	5	5	7	0	0	0	5	5	7	33.5	33.5	33.5	38.787	343	343	0	91.61	0	0	0	21.6	23.9	33.5	71115000	0	0	0	19183000	19766000
Q1KMD3	Q1KMD3	9	9	9	Heterogeneous nuclear ribonucleoprotein U-like protein 2	HNRNPUL2	sp|Q1KMD3|HNRL2_HUMAN Heterogeneous nuclear ribonucleoprotein U-like protein 2 OS=Homo sapiens OX=9606 GN=HNRNPUL2 PE=1 SV=1	1	9	9	9	0	0	0	5	8	4	0	0	0	5	8	4	0	0	0	5	8	4	15.9	15.9	15.9	85.104	747	747	0	55.515	0	0	0	11.8	14.7	10.6	71056000	0	0	0	19350000	32626000
Q9UKM9	Q9UKM9	11	11	11	RNA-binding protein Raly	RALY	sp|Q9UKM9|RALY_HUMAN RNA-binding protein Raly OS=Homo sapiens OX=9606 GN=RALY PE=1 SV=1	1	11	11	11	0	0	0	4	9	9	0	0	0	4	9	9	0	0	0	4	9	9	40.2	40.2	40.2	32.463	306	306	0	48.795	0	0	0	13.4	36.6	36.6	70193000	0	0	0	19570000	27502000
P10809	P10809	15	15	15	60 kDa heat shock protein, mitochondrial	HSPD1	sp|P10809|CH60_HUMAN 60 kDa heat shock protein, mitochondrial OS=Homo sapiens OX=9606 GN=HSPD1 PE=1 SV=2	1	15	15	15	9	7	9	6	4	4	9	7	9	6	4	4	9	7	9	6	4	4	47.1	47.1	47.1	61.054	573	573	0	323.31	32.3	27.2	31.9	20.4	11.2	13.4	450860000	275420000	66622000	39993000	24950000	22649000
Q96NC0	Q96NC0	4	4	4	Zinc finger matrin-type protein 2	ZMAT2	sp|Q96NC0|ZMAT2_HUMAN Zinc finger matrin-type protein 2 OS=Homo sapiens OX=9606 GN=ZMAT2 PE=1 SV=1	1	4	4	4	0	0	0	3	4	2	0	0	0	3	4	2	0	0	0	3	4	2	32.2	32.2	32.2	23.612	199	199	0	57.919	0	0	0	27.1	32.2	11.1	68671000	0	0	0	33506000	25878000
P46782	P46782	4	4	4	40S ribosomal protein S5;40S ribosomal protein S5, N-terminally processed	RPS5	sp|P46782|RS5_HUMAN 40S ribosomal protein S5 OS=Homo sapiens OX=9606 GN=RPS5 PE=1 SV=4	1	4	4	4	0	0	2	4	3	3	0	0	2	4	3	3	0	0	2	4	3	3	27	27	27	22.876	204	204	0	21.559	0	0	14.7	27	26.5	27	69309000	0	0	1330700	26075000	6312500
Q96BZ8	Q96BZ8	7	7	7	Leukocyte receptor cluster member 1	LENG1	sp|Q96BZ8|LENG1_HUMAN Leukocyte receptor cluster member 1 OS=Homo sapiens OX=9606 GN=LENG1 PE=1 SV=1	1	7	7	7	0	0	0	4	5	6	0	0	0	4	5	6	0	0	0	4	5	6	25.8	25.8	25.8	30.529	264	264	0	33.992	0	0	0	9.8	23.5	23.9	67596000	0	0	0	17162000	21817000
Q53F19	Q53F19	7	7	7	Uncharacterized protein C17orf85	C17orf85	sp|Q53F19|NCBP3_HUMAN Nuclear cap-binding protein subunit 3 OS=Homo sapiens OX=9606 GN=NCBP3 PE=1 SV=2	1	7	7	7	0	0	0	6	4	5	0	0	0	6	4	5	0	0	0	6	4	5	11.3	11.3	11.3	70.592	620	620	0	23.236	0	0	0	9.2	8.7	7.4	67132000	0	0	0	20533000	20837000
P51991	P51991	6	6	6	Heterogeneous nuclear ribonucleoprotein A3	HNRNPA3	sp|P51991|ROA3_HUMAN Heterogeneous nuclear ribonucleoprotein A3 OS=Homo sapiens OX=9606 GN=HNRNPA3 PE=1 SV=2	1	6	6	6	2	0	0	1	3	5	2	0	0	1	3	5	2	0	0	1	3	5	32.3	32.3	32.3	39.594	378	378	0	88.426	11.4	0	0	5.8	15.3	26.7	67675000	900450	0	0	10331000	20439000
O43823	O43823	4	4	4	A-kinase anchor protein 8	AKAP8	sp|O43823|AKAP8_HUMAN A-kinase anchor protein 8 OS=Homo sapiens OX=9606 GN=AKAP8 PE=1 SV=1	1	4	4	4	0	0	0	4	4	2	0	0	0	4	4	2	0	0	0	4	4	2	14.3	14.3	14.3	76.107	692	692	0	57.061	0	0	0	14.3	14.3	7.4	66258000	0	0	0	23870000	18422000
P23246	P23246	13	13	12	Splicing factor, proline- and glutamine-rich	SFPQ	sp|P23246|SFPQ_HUMAN Splicing factor, proline- and glutamine-rich OS=Homo sapiens OX=9606 GN=SFPQ PE=1 SV=2	1	13	13	12	1	1	0	6	8	7	1	1	0	6	8	7	1	1	0	6	7	7	19	19	17.8	76.149	707	707	0	41.274	2.1	2.1	0	11.2	12	11.9	67337000	970710	454090	0	12262000	21552000
Q9C0J8	Q9C0J8	6	6	6	pre-mRNA 3 end processing protein WDR33	WDR33	sp|Q9C0J8|WDR33_HUMAN pre-mRNA 3 end processing protein WDR33 OS=Homo sapiens OX=9606 GN=WDR33 PE=1 SV=2	1	6	6	6	0	0	0	4	4	6	0	0	0	4	4	6	0	0	0	4	4	6	8.3	8.3	8.3	145.89	1336	1336	0	44.566	0	0	0	7	7	8.3	65764000	0	0	0	17151000	17299000
Q9Y3I0	Q9Y3I0	7	7	7	tRNA-splicing ligase RtcB homolog	RTCB	sp|Q9Y3I0|RTCB_HUMAN tRNA-splicing ligase RtcB homolog OS=Homo sapiens OX=9606 GN=RTCB PE=1 SV=1	1	7	7	7	0	0	0	5	5	6	0	0	0	5	5	6	0	0	0	5	5	6	18.2	18.2	18.2	55.21	505	505	0	24.611	0	0	0	18.2	16	18.2	64747000	0	0	0	17872000	20408000
Q9NR30	Q9NR30	12	12	9	Nucleolar RNA helicase 2	DDX21	sp|Q9NR30|DDX21_HUMAN Nucleolar RNA helicase 2 OS=Homo sapiens OX=9606 GN=DDX21 PE=1 SV=5	1	12	12	9	0	0	0	7	7	5	0	0	0	7	7	5	0	0	0	5	4	3	21.5	21.5	17.6	87.343	783	783	0	31.791	0	0	0	14.6	11.5	7.2	64617000	0	0	0	28735000	20562000
Q14147	Q14147	12	12	12	Probable ATP-dependent RNA helicase DHX34	DHX34	sp|Q14147|DHX34_HUMAN Probable ATP-dependent RNA helicase DHX34 OS=Homo sapiens OX=9606 GN=DHX34 PE=1 SV=2	1	12	12	12	0	0	0	6	10	7	0	0	0	6	10	7	0	0	0	6	10	7	18.8	18.8	18.8	128.12	1143	1143	0	27.806	0	0	0	10.3	15.5	12.6	63573000	0	0	0	21470000	23152000
Q3ZCM7	Q3ZCM7	11	2	2	Tubulin beta-8 chain	TUBB8	sp|Q3ZCM7|TBB8_HUMAN Tubulin beta-8 chain OS=Homo sapiens OX=9606 GN=TUBB8 PE=1 SV=2	1	11	2	2	8	6	6	6	11	7	0	0	1	1	2	1	0	0	1	1	2	1	25.2	7.4	7.4	49.775	444	444	0	29.37	16	13.7	20.9	18.9	25.2	21.2	71919000	0	0	9949800	12457000	29844000
Q9BW85	Q9BW85	8	8	8	Coiled-coil domain-containing protein 94	CCDC94	sp|Q9BW85|YJU2_HUMAN Splicing factor YJU2 OS=Homo sapiens OX=9606 GN=YJU2 PE=1 SV=1	1	8	8	8	0	0	0	6	4	6	0	0	0	6	4	6	0	0	0	6	4	6	45.5	45.5	45.5	37.085	323	323	0	36.293	0	0	0	38.7	25.4	32.2	61773000	0	0	0	19991000	15269000
Q9Y388	Q9Y388	10	10	10	RNA-binding motif protein, X-linked 2	RBMX2	sp|Q9Y388|RBMX2_HUMAN RNA-binding motif protein, X-linked 2 OS=Homo sapiens OX=9606 GN=RBMX2 PE=1 SV=2	1	10	10	10	0	0	0	6	8	7	0	0	0	6	8	7	0	0	0	6	8	7	22.4	22.4	22.4	37.335	322	322	0	50.605	0	0	0	14.9	19.6	17.7	60881000	0	0	0	15117000	26219000
Q9BUJ2	Q9BUJ2	7	7	7	Heterogeneous nuclear ribonucleoprotein U-like protein 1	HNRNPUL1	sp|Q9BUJ2|HNRL1_HUMAN Heterogeneous nuclear ribonucleoprotein U-like protein 1 OS=Homo sapiens OX=9606 GN=HNRNPUL1 PE=1 SV=2	1	7	7	7	0	0	0	4	6	3	0	0	0	4	6	3	0	0	0	4	6	3	12	12	12	95.737	856	856	0	37.012	0	0	0	7.8	11.9	4.8	60876000	0	0	0	16941000	29829000
Q8TA86	Q8TA86	5	5	5	Retinitis pigmentosa 9 protein	RP9	sp|Q8TA86|RP9_HUMAN Retinitis pigmentosa 9 protein OS=Homo sapiens OX=9606 GN=RP9 PE=1 SV=2	1	5	5	5	0	0	0	3	4	4	0	0	0	3	4	4	0	0	0	3	4	4	26.2	26.2	26.2	26.106	221	221	0	38.057	0	0	0	17.6	19.5	22.2	60230000	0	0	0	10094000	6021000
P62244	P62244	5	5	5	40S ribosomal protein S15a	RPS15A	sp|P62244|RS15A_HUMAN 40S ribosomal protein S15a OS=Homo sapiens OX=9606 GN=RPS15A PE=1 SV=2	1	5	5	5	0	0	0	2	4	4	0	0	0	2	4	4	0	0	0	2	4	4	40	40	40	14.839	130	130	0	11.176	0	0	0	8.5	25.4	29.2	60189000	0	0	0	11525000	27814000
Q8IX12	Q8IX12	7	7	7	Cell division cycle and apoptosis regulator protein 1	CCAR1	sp|Q8IX12|CCAR1_HUMAN Cell division cycle and apoptosis regulator protein 1 OS=Homo sapiens OX=9606 GN=CCAR1 PE=1 SV=2	1	7	7	7	0	0	0	2	4	7	0	0	0	2	4	7	0	0	0	2	4	7	9	9	9	132.82	1150	1150	0	27.768	0	0	0	3.4	4.9	9	59656000	0	0	0	6900900	23622000
P62318	P62318	5	5	5	Small nuclear ribonucleoprotein Sm D3	SNRPD3	sp|P62318|SMD3_HUMAN Small nuclear ribonucleoprotein Sm D3 OS=Homo sapiens OX=9606 GN=SNRPD3 PE=1 SV=1	1	5	5	5	0	0	0	4	4	2	0	0	0	4	4	2	0	0	0	4	4	2	57.9	57.9	57.9	13.916	126	126	0	21.938	0	0	0	50.8	50.8	17.5	59098000	0	0	0	23805000	30205000
Q9UHX1	Q9UHX1	5	5	5	Poly(U)-binding-splicing factor PUF60	PUF60	sp|Q9UHX1|PUF60_HUMAN Poly(U)-binding-splicing factor PUF60 OS=Homo sapiens OX=9606 GN=PUF60 PE=1 SV=1	1	5	5	5	0	0	0	3	5	4	0	0	0	3	5	4	0	0	0	3	5	4	15.6	15.6	15.6	59.875	559	559	0	18.397	0	0	0	11.6	15.6	14.8	58792000	0	0	0	9954200	23966000
P16402	P16402	11	2	2	Histone H1.3	HIST1H1D	sp|P16402|H13_HUMAN Histone H1.3 OS=Homo sapiens OX=9606 GN=HIST1H1D PE=1 SV=2	1	11	2	2	4	6	5	8	11	11	0	0	0	2	2	2	0	0	0	2	2	2	37.6	9.5	9.5	22.35	221	221	0	16.343	22.6	22.6	22.2	32.1	37.6	37.6	58739000	0	0	0	18236000	18770000
Q13526;O15428	Q13526	5;1	5;1	5;1	Peptidyl-prolyl cis-trans isomerase NIMA-interacting 1	PIN1	sp|Q13526|PIN1_HUMAN Peptidyl-prolyl cis-trans isomerase NIMA-interacting 1 OS=Homo sapiens OX=9606 GN=PIN1 PE=1 SV=1	2	5	5	5	0	0	0	3	3	4	0	0	0	3	3	4	0	0	0	3	3	4	50.9	50.9	50.9	18.243	163	163;100	0	20.575	0	0	0	34.4	34.4	38.7	58240000	0	0	0	14879000	21303000
Q15131	Q15131	4	4	4	Cyclin-dependent kinase 10	CDK10	sp|Q15131|CDK10_HUMAN Cyclin-dependent kinase 10 OS=Homo sapiens OX=9606 GN=CDK10 PE=1 SV=1	1	4	4	4	0	0	0	2	3	1	0	0	0	2	3	1	0	0	0	2	3	1	12.5	12.5	12.5	41.038	360	360	0	10.48	0	0	0	5.8	10.3	3.6	55440000	0	0	0	13469000	27285000
Q9BQ39	Q9BQ39	11	8	8	ATP-dependent RNA helicase DDX50	DDX50	sp|Q9BQ39|DDX50_HUMAN ATP-dependent RNA helicase DDX50 OS=Homo sapiens OX=9606 GN=DDX50 PE=1 SV=1	1	11	8	8	0	0	0	7	9	5	0	0	0	5	6	3	0	0	0	5	6	3	21.8	17.8	17.8	82.564	737	737	0	24.019	0	0	0	15.1	16.7	7.6	54886000	0	0	0	18479000	24275000
P51114	P51114	9	9	8	Fragile X mental retardation syndrome-related protein 1	FXR1	sp|P51114|FXR1_HUMAN Fragile X mental retardation syndrome-related protein 1 OS=Homo sapiens OX=9606 GN=FXR1 PE=1 SV=3	1	9	9	8	0	0	0	3	6	6	0	0	0	3	6	6	0	0	0	2	5	5	21.3	21.3	20	69.72	621	621	0	24.213	0	0	0	11.3	16.9	17.1	53684000	0	0	0	15966000	17509000
P61313	P61313	6	6	6	60S ribosomal protein L15	RPL15	sp|P61313|RL15_HUMAN 60S ribosomal protein L15 OS=Homo sapiens OX=9606 GN=RPL15 PE=1 SV=2	1	6	6	6	1	2	1	3	3	0	1	2	1	3	3	0	1	2	1	3	3	0	28.9	28.9	28.9	24.146	204	204	0	25.31	4.4	10.3	4.4	12.7	14.7	0	71231000	3695000	11099000	2826600	15466000	38145000
Q969Q0;P83881	Q969Q0;P83881	2;2	2;2	2;2	60S ribosomal protein L36a-like;60S ribosomal protein L36a	RPL36AL;RPL36A	sp|Q969Q0|RL36L_HUMAN 60S ribosomal protein L36a-like OS=Homo sapiens OX=9606 GN=RPL36AL PE=1 SV=3;sp|P83881|RL36A_HUMAN 60S ribosomal protein L36a OS=Homo sapiens OX=9606 GN=RPL36A PE=1 SV=2	2	2	2	2	1	0	0	2	2	1	1	0	0	2	2	1	1	0	0	2	2	1	18.9	18.9	18.9	12.469	106	106;106	0	10.354	12.3	0	0	18.9	18.9	12.3	54496000	1049900	0	0	16611000	28199000
O00139	O00139	8	8	7	Kinesin-like protein KIF2A	KIF2A	sp|O00139|KIF2A_HUMAN Kinesin-like protein KIF2A OS=Homo sapiens OX=9606 GN=KIF2A PE=1 SV=3	1	8	8	7	0	0	0	2	6	5	0	0	0	2	6	5	0	0	0	1	5	4	17.6	17.6	15.4	79.954	706	706	0	36.524	0	0	0	4.4	13.9	11.2	53124000	0	0	0	8481800	26614000
Q9BWF3	Q9BWF3	4	4	4	RNA-binding protein 4	RBM4	sp|Q9BWF3|RBM4_HUMAN RNA-binding protein 4 OS=Homo sapiens OX=9606 GN=RBM4 PE=1 SV=1	1	4	4	4	0	0	0	2	1	4	0	0	0	2	1	4	0	0	0	2	1	4	16.8	16.8	16.8	40.313	364	364	0	52.166	0	0	0	12.4	7.7	16.8	52997000	0	0	0	5310300	15801000
Q9Y241	Q9Y241	3	3	3	HIG1 domain family member 1A, mitochondrial	HIGD1A	sp|Q9Y241|HIG1A_HUMAN HIG1 domain family member 1A, mitochondrial OS=Homo sapiens OX=9606 GN=HIGD1A PE=1 SV=1	1	3	3	3	1	2	0	3	3	2	1	2	0	3	3	2	1	2	0	3	3	2	23.7	23.7	23.7	10.143	93	93	0	42.243	19.4	22.6	0	23.7	23.7	23.7	57312000	792520	3735000	0	15334000	23612000
Q9Y3C6	Q9Y3C6	3	3	3	Peptidyl-prolyl cis-trans isomerase-like 1	PPIL1	sp|Q9Y3C6|PPIL1_HUMAN Peptidyl-prolyl cis-trans isomerase-like 1 OS=Homo sapiens OX=9606 GN=PPIL1 PE=1 SV=1	1	3	3	3	0	0	0	2	2	3	0	0	0	2	2	3	0	0	0	2	2	3	26.5	26.5	26.5	18.237	166	166	0	9.4304	0	0	0	20.5	20.5	26.5	52683000	0	0	0	4091900	30672000
Q71DI3	Q71DI3	6	6	2	Histone H3.2	HIST2H3A	sp|Q71DI3|H32_HUMAN Histone H3.2 OS=Homo sapiens OX=9606 GN=HIST2H3D PE=1 SV=3	1	6	6	2	2	2	1	4	4	2	2	2	1	4	4	2	1	1	0	0	0	0	45.6	45.6	26.5	15.388	136	136	0	287.33	33.1	30.1	6.6	22.1	22.1	11.8	101560000	39524000	9742500	0	21935000	21220000
P08708	P08708	2	2	2	40S ribosomal protein S17	RPS17	sp|P08708|RS17_HUMAN 40S ribosomal protein S17 OS=Homo sapiens OX=9606 GN=RPS17 PE=1 SV=2	1	2	2	2	2	2	0	2	1	1	2	2	0	2	1	1	2	2	0	2	1	1	37.8	37.8	37.8	15.55	135	135	0	22.899	37.8	37.8	0	37.8	18.5	18.5	56336000	1758200	2439600	0	16260000	19064000
P19105;O14950;P24844	P19105;O14950;P24844	2;2;1	2;2;1	2;2;1	Myosin regulatory light chain 12A;Myosin regulatory light chain 12B;Myosin regulatory light polypeptide 9	MYL12A;MYL12B;MYL9	sp|P19105|ML12A_HUMAN Myosin regulatory light chain 12A OS=Homo sapiens OX=9606 GN=MYL12A PE=1 SV=2;sp|O14950|ML12B_HUMAN Myosin regulatory light chain 12B OS=Homo sapiens OX=9606 GN=MYL12B PE=1 SV=2;sp|P24844|MYL9_HUMAN Myosin regulatory light polypeptide	3	2	2	2	2	1	1	1	1	1	2	1	1	1	1	1	2	1	1	1	1	1	22.2	22.2	22.2	19.794	171	171;172;172	0	8.7064	22.2	5.8	5.8	5.8	5.8	5.8	90852000	15296000	16978000	6707500	17543000	22012000
O75554	O75554	4	4	4	WW domain-binding protein 4	WBP4	sp|O75554|WBP4_HUMAN WW domain-binding protein 4 OS=Homo sapiens OX=9606 GN=WBP4 PE=1 SV=1	1	4	4	4	0	0	0	3	3	4	0	0	0	3	3	4	0	0	0	3	3	4	11.2	11.2	11.2	42.506	376	376	0	21.3	0	0	0	7.2	7.2	11.2	50882000	0	0	0	14981000	10882000
P18077	P18077	4	4	4	60S ribosomal protein L35a	RPL35A	sp|P18077|RL35A_HUMAN 60S ribosomal protein L35a OS=Homo sapiens OX=9606 GN=RPL35A PE=1 SV=2	1	4	4	4	1	0	0	2	4	3	1	0	0	2	4	3	1	0	0	2	4	3	23.6	23.6	23.6	12.538	110	110	0	6.9203	7.3	0	0	14.5	23.6	16.4	50187000	0	0	0	11646000	29458000
Q14966	Q14966	9	9	9	Zinc finger protein 638	ZNF638	sp|Q14966|ZN638_HUMAN Zinc finger protein 638 OS=Homo sapiens OX=9606 GN=ZNF638 PE=1 SV=2	1	9	9	9	0	0	0	7	7	1	0	0	0	7	7	1	0	0	0	7	7	1	6.2	6.2	6.2	220.62	1978	1978	0	30.077	0	0	0	4.9	5.3	1.2	50008000	0	0	0	23147000	23395000
P62910	P62910	7	7	7	60S ribosomal protein L32	RPL32	sp|P62910|RL32_HUMAN 60S ribosomal protein L32 OS=Homo sapiens OX=9606 GN=RPL32 PE=1 SV=2	1	7	7	7	0	0	0	4	6	1	0	0	0	4	6	1	0	0	0	4	6	1	47.4	47.4	47.4	15.86	135	135	0	16.53	0	0	0	34.8	42.2	9.6	49575000	0	0	0	24594000	22942000
Q8TBK6	Q8TBK6	2	2	2	Zinc finger CCHC domain-containing protein 10	ZCCHC10	sp|Q8TBK6|ZCH10_HUMAN Zinc finger CCHC domain-containing protein 10 OS=Homo sapiens OX=9606 GN=ZCCHC10 PE=1 SV=1	1	2	2	2	0	0	0	1	2	2	0	0	0	1	2	2	0	0	0	1	2	2	7.8	7.8	7.8	20.966	192	192	0	17.742	0	0	0	7.3	7.8	7.8	49297000	0	0	0	10820000	18723000
Q96N46	Q96N46	11	11	11	Tetratricopeptide repeat protein 14	TTC14	sp|Q96N46|TTC14_HUMAN Tetratricopeptide repeat protein 14 OS=Homo sapiens OX=9606 GN=TTC14 PE=1 SV=1	1	11	11	11	0	0	0	4	6	6	0	0	0	4	6	6	0	0	0	4	6	6	16.1	16.1	16.1	88.318	770	770	0	27.995	0	0	0	6.9	10.9	10.6	49224000	0	0	0	10367000	20061000
Q8N684	Q8N684	5	5	5	Cleavage and polyadenylation specificity factor subunit 7	CPSF7	sp|Q8N684|CPSF7_HUMAN Cleavage and polyadenylation specificity factor subunit 7 OS=Homo sapiens OX=9606 GN=CPSF7 PE=1 SV=1	1	5	5	5	0	0	0	3	3	5	0	0	0	3	3	5	0	0	0	3	3	5	14.6	14.6	14.6	52.049	471	471	0	13.655	0	0	0	9.3	9.3	14.6	47815000	0	0	0	13102000	14983000
P05141;Q9H0C2	P05141	10;1	10;1	6;0	ADP/ATP translocase 2;ADP/ATP translocase 2, N-terminally processed	SLC25A5	sp|P05141|ADT2_HUMAN ADP/ATP translocase 2 OS=Homo sapiens OX=9606 GN=SLC25A5 PE=1 SV=7	2	10	10	6	4	2	2	3	9	5	4	2	2	3	9	5	3	2	2	2	6	4	28.2	28.2	15.8	32.852	298	298;315	0	137.35	15.8	7.4	9.4	15.8	24.8	15.8	54980000	3413100	2138800	1787800	12174000	20820000
Q12872	Q12872	8	8	8	Splicing factor, suppressor of white-apricot homolog	SFSWAP	sp|Q12872|SFSWA_HUMAN Splicing factor, suppressor of white-apricot homolog OS=Homo sapiens OX=9606 GN=SFSWAP PE=1 SV=3	1	8	8	8	0	0	0	3	3	5	0	0	0	3	3	5	0	0	0	3	3	5	9.8	9.8	9.8	104.82	951	951	0	19.813	0	0	0	4.5	3.4	7.8	47589000	0	0	0	14760000	15123000
Q8NC51	Q8NC51	3	3	3	Plasminogen activator inhibitor 1 RNA-binding protein	SERBP1	sp|Q8NC51|PAIRB_HUMAN Plasminogen activator inhibitor 1 RNA-binding protein OS=Homo sapiens OX=9606 GN=SERBP1 PE=1 SV=2	1	3	3	3	2	0	1	2	2	2	2	0	1	2	2	2	2	0	1	2	2	2	16.7	16.7	16.7	44.965	408	408	0	313.64	11.5	0	3.9	9.1	9.1	9.1	56319000	9033000	0	380780	9647000	24304000
Q9BZL1	Q9BZL1	5	5	5	Ubiquitin-like protein 5	UBL5	sp|Q9BZL1|UBL5_HUMAN Ubiquitin-like protein 5 OS=Homo sapiens OX=9606 GN=UBL5 PE=1 SV=1	1	5	5	5	0	0	0	1	4	3	0	0	0	1	4	3	0	0	0	1	4	3	53.4	53.4	53.4	8.5468	73	73	0	14.415	0	0	0	16.4	53.4	35.6	45918000	0	0	0	10802000	11809000
P62851	P62851	4	4	4	40S ribosomal protein S25	RPS25	sp|P62851|RS25_HUMAN 40S ribosomal protein S25 OS=Homo sapiens OX=9606 GN=RPS25 PE=1 SV=1	1	4	4	4	2	0	0	4	2	2	2	0	0	4	2	2	2	0	0	4	2	2	28	28	28	13.742	125	125	0	7.9283	15.2	0	0	28	15.2	16.8	48246000	2380600	0	0	13814000	19902000
P62857	P62857	4	4	4	40S ribosomal protein S28	RPS28	sp|P62857|RS28_HUMAN 40S ribosomal protein S28 OS=Homo sapiens OX=9606 GN=RPS28 PE=1 SV=1	1	4	4	4	0	1	0	2	3	4	0	1	0	2	3	4	0	1	0	2	3	4	75.4	75.4	75.4	7.8409	69	69	0	26.808	0	18.8	0	46.4	47.8	75.4	46647000	0	1132400	0	3492300	10452000
P55265	P55265	5	5	5	Double-stranded RNA-specific adenosine deaminase	ADAR	sp|P55265|DSRAD_HUMAN Double-stranded RNA-specific adenosine deaminase OS=Homo sapiens OX=9606 GN=ADAR PE=1 SV=4	1	5	5	5	0	0	0	2	3	5	0	0	0	2	3	5	0	0	0	2	3	5	6.9	6.9	6.9	136.06	1226	1226	0	16.228	0	0	0	2.4	3.9	6.9	44543000	0	0	0	11000000	12974000
Q8N2M8	Q8N2M8	6	6	6	CLK4-associating serine/arginine rich protein	CLASRP	sp|Q8N2M8|CLASR_HUMAN CLK4-associating serine/arginine rich protein OS=Homo sapiens OX=9606 GN=CLASRP PE=1 SV=4	1	6	6	6	0	0	0	4	2	5	0	0	0	4	2	5	0	0	0	4	2	5	17.7	17.7	17.7	77.16	674	674	0	21.455	0	0	0	15.4	5.9	16.8	44485000	0	0	0	10590000	10115000
P62277	P62277	8	8	8	40S ribosomal protein S13	RPS13	sp|P62277|RS13_HUMAN 40S ribosomal protein S13 OS=Homo sapiens OX=9606 GN=RPS13 PE=1 SV=2	1	8	8	8	0	0	0	1	6	5	0	0	0	1	6	5	0	0	0	1	6	5	39.1	39.1	39.1	17.222	151	151	0	23.389	0	0	0	7.3	39.1	25.8	44447000	0	0	0	4635000	25780000
Q14145	Q14145	8	8	8	Kelch-like ECH-associated protein 1	KEAP1	sp|Q14145|KEAP1_HUMAN Kelch-like ECH-associated protein 1 OS=Homo sapiens OX=9606 GN=KEAP1 PE=1 SV=2	1	8	8	8	0	0	0	5	7	4	0	0	0	5	7	4	0	0	0	5	7	4	20.4	20.4	20.4	69.666	624	624	0	23.369	0	0	0	10.9	18.3	8.3	44095000	0	0	0	9341200	27157000
P22626	P22626	10	10	10	Heterogeneous nuclear ribonucleoproteins A2/B1	HNRNPA2B1	sp|P22626|ROA2_HUMAN Heterogeneous nuclear ribonucleoproteins A2/B1 OS=Homo sapiens OX=9606 GN=HNRNPA2B1 PE=1 SV=2	1	10	10	10	3	1	0	1	3	6	3	1	0	1	3	6	3	1	0	1	3	6	49.6	49.6	49.6	37.429	353	353	0	170.21	22.7	6.8	0	2.8	17.6	26.9	137870000	55934000	38784000	0	2392200	13696000
Q70Z53	Q70Z53	6	6	6	Protein FRA10AC1	FRA10AC1	sp|Q70Z53|F10C1_HUMAN Protein FRA10AC1 OS=Homo sapiens OX=9606 GN=FRA10AC1 PE=1 SV=3	1	6	6	6	0	0	0	3	4	6	0	0	0	3	4	6	0	0	0	3	4	6	14.3	14.3	14.3	37.548	315	315	0	18.819	0	0	0	9.2	14	14.3	42714000	0	0	0	7982900	14393000
Q8N954	Q8N954	4	4	4	G patch domain-containing protein 11	GPATCH11	sp|Q8N954|GPT11_HUMAN G patch domain-containing protein 11 OS=Homo sapiens OX=9606 GN=GPATCH11 PE=1 SV=4	1	4	4	4	0	0	0	3	3	3	0	0	0	3	3	3	0	0	0	3	3	3	15.4	15.4	15.4	33.277	285	285	0	14.07	0	0	0	14.4	14.4	11.2	42452000	0	0	0	12124000	13415000
Q10570	Q10570	7	7	7	Cleavage and polyadenylation specificity factor subunit 1	CPSF1	sp|Q10570|CPSF1_HUMAN Cleavage and polyadenylation specificity factor subunit 1 OS=Homo sapiens OX=9606 GN=CPSF1 PE=1 SV=2	1	7	7	7	0	0	0	2	7	3	0	0	0	2	7	3	0	0	0	2	7	3	8.1	8.1	8.1	160.88	1443	1443	0	67.563	0	0	0	2.1	8.1	4.6	41784000	0	0	0	5014700	23603000
P13639	P13639	8	7	7	Elongation factor 2	EEF2	sp|P13639|EF2_HUMAN Elongation factor 2 OS=Homo sapiens OX=9606 GN=EEF2 PE=1 SV=4	1	8	7	7	4	4	2	3	3	3	4	4	2	3	2	3	4	4	2	3	2	3	14.6	13.4	13.4	95.337	858	858	0	20.423	5.9	5.7	4.9	4.3	4.1	5.5	53824000	4256400	4502700	3374800	10888000	13292000
Q13148	Q13148	3	3	3	TAR DNA-binding protein 43	TARDBP	sp|Q13148|TADBP_HUMAN TAR DNA-binding protein 43 OS=Homo sapiens OX=9606 GN=TARDBP PE=1 SV=1	1	3	3	3	0	1	1	2	3	1	0	1	1	2	3	1	0	1	1	2	3	1	13.3	13.3	13.3	44.739	414	414	0	26.555	0	4.3	4.3	6.5	13.3	4.3	42577000	0	934600	0	12192000	16033000
Q6NVV7	Q6NVV7	4	4	4	Cysteine-rich DPF motif domain-containing protein 1	CDPF1	sp|Q6NVV7|CDPF1_HUMAN Cysteine-rich DPF motif domain-containing protein 1 OS=Homo sapiens OX=9606 GN=CDPF1 PE=1 SV=1	1	4	4	4	0	0	0	2	3	3	0	0	0	2	3	3	0	0	0	2	3	3	28.5	28.5	28.5	13.877	123	123	0	20.473	0	0	0	12.2	22.8	17.9	41040000	0	0	0	13078000	9635000
Q9BQE3	Q9BQE3	25	5	2	Tubulin alpha-1C chain	TUBA1C	sp|Q9BQE3|TBA1C_HUMAN Tubulin alpha-1C chain OS=Homo sapiens OX=9606 GN=TUBA1C PE=1 SV=1	1	25	5	2	16	11	11	15	20	14	2	2	2	3	5	1	1	1	1	2	2	1	69.5	16.7	9.1	49.895	449	449	0	68.776	51.2	34.1	35	40.5	51.2	37.9	55695000	5737900	3084600	6955300	10178000	25240000
Q14331	Q14331	7	7	7	Protein FRG1	FRG1	sp|Q14331|FRG1_HUMAN Protein FRG1 OS=Homo sapiens OX=9606 GN=FRG1 PE=1 SV=1	1	7	7	7	0	0	0	4	5	3	0	0	0	4	5	3	0	0	0	4	5	3	24.4	24.4	24.4	29.172	258	258	0	22.65	0	0	0	14	16.7	17.4	39869000	0	0	0	10982000	19476000
Q13838;O00148	Q13838;O00148	7;4	7;4	7;4	Spliceosome RNA helicase DDX39B;ATP-dependent RNA helicase DDX39A	DDX39B;DDX39A	sp|Q13838|DX39B_HUMAN Spliceosome RNA helicase DDX39B OS=Homo sapiens OX=9606 GN=DDX39B PE=1 SV=1;sp|O00148|DX39A_HUMAN ATP-dependent RNA helicase DDX39A OS=Homo sapiens OX=9606 GN=DDX39A PE=1 SV=2	2	7	7	7	0	0	0	2	5	5	0	0	0	2	5	5	0	0	0	2	5	5	32.9	32.9	32.9	48.991	428	428;427	0	27.519	0	0	0	9.1	21.5	25.7	39412000	0	0	0	5762300	15102000
Q16643	Q16643	6	6	6	Drebrin	DBN1	sp|Q16643|DREB_HUMAN Drebrin OS=Homo sapiens OX=9606 GN=DBN1 PE=1 SV=4	1	6	6	6	4	3	3	2	4	3	4	3	3	2	4	3	4	3	3	2	4	3	16	16	16	71.428	649	649	0	29.949	12.8	9.1	9.1	6	10.3	6.6	64302000	12376000	6823200	6128600	9243200	22192000
P18615	P18615	5	5	5	Negative elongation factor E	NELFE	sp|P18615|NELFE_HUMAN Negative elongation factor E OS=Homo sapiens OX=9606 GN=NELFE PE=1 SV=3	1	5	5	5	0	0	0	4	4	5	0	0	0	4	4	5	0	0	0	4	4	5	22.1	22.1	22.1	43.239	380	380	0	17.86	0	0	0	17.6	17.6	22.1	36948000	0	0	0	6800600	10892000
Q9HB71	Q9HB71	1	1	1	Calcyclin-binding protein	CACYBP	sp|Q9HB71|CYBP_HUMAN Calcyclin-binding protein OS=Homo sapiens OX=9606 GN=CACYBP PE=1 SV=2	1	1	1	1	0	0	0	0	1	1	0	0	0	0	1	1	0	0	0	0	1	1	7.9	7.9	7.9	26.21	228	228	0	88.296	0	0	0	0	7.9	7.9	36396000	0	0	0	0	20302000
P42285	P42285	7	7	7	Superkiller viralicidic activity 2-like 2	SKIV2L2	sp|P42285|MTREX_HUMAN Exosome RNA helicase MTR4 OS=Homo sapiens OX=9606 GN=MTREX PE=1 SV=3	1	7	7	7	0	0	0	2	5	3	0	0	0	2	5	3	0	0	0	2	5	3	8.1	8.1	8.1	117.8	1042	1042	0	39.264	0	0	0	4.5	6.6	5.8	35778000	0	0	0	7756100	8955900
Q9Y230	Q9Y230	4	4	4	RuvB-like 2	RUVBL2	sp|Q9Y230|RUVB2_HUMAN RuvB-like 2 OS=Homo sapiens OX=9606 GN=RUVBL2 PE=1 SV=3	1	4	4	4	3	1	1	3	4	2	3	1	1	3	4	2	3	1	1	3	4	2	9.9	9.9	9.9	51.156	463	463	0	37.063	7.3	2.8	2.4	7.8	9.9	5.2	41099000	4379800	0	1201100	9517300	15712000
Q15050	Q15050	4	4	4	Ribosome biogenesis regulatory protein homolog	RRS1	sp|Q15050|RRS1_HUMAN Ribosome biogenesis regulatory protein homolog OS=Homo sapiens OX=9606 GN=RRS1 PE=1 SV=2	1	4	4	4	0	0	0	4	2	1	0	0	0	4	2	1	0	0	0	4	2	1	24.9	24.9	24.9	41.193	365	365	0	28.45	0	0	0	24.9	13.2	6.3	35390000	0	0	0	15126000	9720100
Q9NZ63	Q9NZ63	6	6	6	Uncharacterized protein C9orf78	C9orf78	sp|Q9NZ63|TLS1_HUMAN Telomere length and silencing protein 1 homolog OS=Homo sapiens OX=9606 GN=C9orf78 PE=1 SV=1	1	6	6	6	0	0	0	3	2	4	0	0	0	3	2	4	0	0	0	3	2	4	26.6	26.6	26.6	33.688	289	289	0	31.85	0	0	0	14.9	13.1	16.6	35139000	0	0	0	12017000	9455700
P25398	P25398	5	5	5	40S ribosomal protein S12	RPS12	sp|P25398|RS12_HUMAN 40S ribosomal protein S12 OS=Homo sapiens OX=9606 GN=RPS12 PE=1 SV=3	1	5	5	5	0	0	0	1	4	4	0	0	0	1	4	4	0	0	0	1	4	4	46.2	46.2	46.2	14.515	132	132	0	34.334	0	0	0	7.6	43.9	30.3	34864000	0	0	0	2631400	15596000
P09651;A0A2R8Y4L2;Q32P51	P09651;A0A2R8Y4L2;Q32P51	4;2;2	4;2;2	4;2;2	Heterogeneous nuclear ribonucleoprotein A1;Heterogeneous nuclear ribonucleoprotein A1, N-terminally processed;Heterogeneous nuclear ribonucleoprotein A1-like 2	HNRNPA1;HNRNPA1L2	sp|P09651|ROA1_HUMAN Heterogeneous nuclear ribonucleoprotein A1 OS=Homo sapiens OX=9606 GN=HNRNPA1 PE=1 SV=5;tr|A0A2R8Y4L2|A0A2R8Y4L2_HUMAN Heterogeneous nuclear ribonucleoprotein A1 pseudogene 48 OS=Homo sapiens OX=9606 GN=HNRNPA1P48 PE=4 SV=1;sp|Q32P51|R	3	4	4	4	2	2	1	2	2	2	2	2	1	2	2	2	2	2	1	2	2	2	23.4	23.4	23.4	38.746	372	372;275;320	0	102.49	14.2	14.2	9.9	9.1	9.1	9.1	122890000	61752000	17774000	8725900	14657000	11476000
Q92522	Q92522	2	2	2	Histone H1x	H1FX	sp|Q92522|H1X_HUMAN Histone H1x OS=Homo sapiens OX=9606 GN=H1FX PE=1 SV=1	1	2	2	2	0	0	0	2	2	2	0	0	0	2	2	2	0	0	0	2	2	2	14.1	14.1	14.1	22.487	213	213	0	17.09	0	0	0	14.1	14.1	14.1	34536000	0	0	0	7684300	14006000
P28799	P28799	3	3	3	Granulins;Acrogranin;Paragranulin;Granulin-1;Granulin-2;Granulin-3;Granulin-4;Granulin-5;Granulin-6;Granulin-7	GRN	sp|P28799|GRN_HUMAN Progranulin OS=Homo sapiens OX=9606 GN=GRN PE=1 SV=2	1	3	3	3	0	0	0	3	3	3	0	0	0	3	3	3	0	0	0	3	3	3	5.2	5.2	5.2	63.544	593	593	0	9.6933	0	0	0	5.2	5.2	5.2	34523000	0	0	0	8248100	17825000
P35579;Q7Z406	P35579	8;1	8;1	7;0	Myosin-9	MYH9	sp|P35579|MYH9_HUMAN Myosin-9 OS=Homo sapiens OX=9606 GN=MYH9 PE=1 SV=4	2	8	8	7	7	3	1	4	2	3	7	3	1	4	2	3	6	2	0	4	2	3	7.3	7.3	6.5	226.53	1960	1960;1995	0	91.207	6.8	2.6	0.8	3.5	1.5	3	65412000	23798000	7136700	0	18609000	2736500
P55795	P55795	14	6	6	Heterogeneous nuclear ribonucleoprotein H2	HNRNPH2	sp|P55795|HNRH2_HUMAN Heterogeneous nuclear ribonucleoprotein H2 OS=Homo sapiens OX=9606 GN=HNRNPH2 PE=1 SV=1	1	14	6	6	1	1	1	7	11	9	0	0	0	1	4	3	0	0	0	1	4	3	33.2	16.9	16.9	49.263	449	449	0	27.321	3.8	3.8	3.8	20.3	32.1	25.2	33885000	0	0	0	4304200	20512000
O60870	O60870	5	5	5	DNA/RNA-binding protein KIN17	KIN	sp|O60870|KIN17_HUMAN DNA/RNA-binding protein KIN17 OS=Homo sapiens OX=9606 GN=KIN PE=1 SV=2	1	5	5	5	0	0	0	3	5	3	0	0	0	3	5	3	0	0	0	3	5	3	14.8	14.8	14.8	45.373	393	393	0	12.904	0	0	0	9.9	14.8	9.9	33814000	0	0	0	7147500	16152000
P24928	P24928	6	6	6	DNA-directed RNA polymerase II subunit RPB1	POLR2A	sp|P24928|RPB1_HUMAN DNA-directed RNA polymerase II subunit RPB1 OS=Homo sapiens OX=9606 GN=POLR2A PE=1 SV=2	1	6	6	6	0	0	0	4	5	3	0	0	0	4	5	3	0	0	0	4	5	3	4.6	4.6	4.6	217.17	1970	1970	0	20.149	0	0	0	2.4	4.6	1.6	33539000	0	0	0	11659000	10549000
Q9UBC1	Q9UBC1	6	6	6	NF-kappa-B inhibitor-like protein 1	NFKBIL1	sp|Q9UBC1|IKBL1_HUMAN NF-kappa-B inhibitor-like protein 1 OS=Homo sapiens OX=9606 GN=NFKBIL1 PE=1 SV=1	1	6	6	6	0	0	0	4	6	3	0	0	0	4	6	3	0	0	0	4	6	3	25.2	25.2	25.2	43.203	381	381	0	20.546	0	0	0	16.8	25.2	10.8	33021000	0	0	0	10707000	13925000
Q15717	Q15717	5	5	5	ELAV-like protein 1	ELAVL1	sp|Q15717|ELAV1_HUMAN ELAV-like protein 1 OS=Homo sapiens OX=9606 GN=ELAVL1 PE=1 SV=2	1	5	5	5	0	0	0	2	4	1	0	0	0	2	4	1	0	0	0	2	4	1	23.6	23.6	23.6	36.091	326	326	0	16.567	0	0	0	11	19	4.6	32516000	0	0	0	7421500	21476000
Q8NEY8	Q8NEY8	4	4	4	Periphilin-1	PPHLN1	sp|Q8NEY8|PPHLN_HUMAN Periphilin-1 OS=Homo sapiens OX=9606 GN=PPHLN1 PE=1 SV=2	1	4	4	4	0	0	0	1	2	3	0	0	0	1	2	3	0	0	0	1	2	3	10.9	10.9	10.9	52.736	458	458	0	12.199	0	0	0	2.4	3.9	9.4	32515000	0	0	0	4947400	9918300
Q14444	Q14444	3	3	3	Caprin-1	CAPRIN1	sp|Q14444|CAPR1_HUMAN Caprin-1 OS=Homo sapiens OX=9606 GN=CAPRIN1 PE=1 SV=2	1	3	3	3	0	0	0	2	3	2	0	0	0	2	3	2	0	0	0	2	3	2	5.4	5.4	5.4	78.365	709	709	0	12.607	0	0	0	5.4	5.4	4.8	32327000	0	0	0	9546900	11021000
Q59GN2;P62891	Q59GN2;P62891	1;1	1;1	1;1	Putative 60S ribosomal protein L39-like 5;60S ribosomal protein L39	RPL39P5;RPL39	sp|Q59GN2|R39L5_HUMAN Putative 60S ribosomal protein L39-like 5 OS=Homo sapiens OX=9606 GN=RPL39P5 PE=5 SV=2;sp|P62891|RL39_HUMAN 60S ribosomal protein L39 OS=Homo sapiens OX=9606 GN=RPL39 PE=1 SV=2	2	1	1	1	0	1	1	1	1	1	0	1	1	1	1	1	0	1	1	1	1	1	19.6	19.6	19.6	6.3225	51	51;51	0	12.281	0	19.6	19.6	19.6	19.6	19.6	36527000	0	1989600	2630400	7659700	12450000
P08865	P08865	6	6	6	40S ribosomal protein SA	RPSA	sp|P08865|RSSA_HUMAN 40S ribosomal protein SA OS=Homo sapiens OX=9606 GN=RPSA PE=1 SV=4	1	6	6	6	3	1	4	3	3	4	3	1	4	3	3	4	3	1	4	3	3	4	31.9	31.9	31.9	32.854	295	295	0	44.252	22	5.8	25.8	14.6	17.6	23.7	37788000	2667600	1361500	2011000	5357900	6175800
P62312	P62312	6	6	6	U6 snRNA-associated Sm-like protein LSm6	LSM6	sp|P62312|LSM6_HUMAN U6 snRNA-associated Sm-like protein LSm6 OS=Homo sapiens OX=9606 GN=LSM6 PE=1 SV=1	1	6	6	6	0	0	0	4	4	6	0	0	0	4	4	6	0	0	0	4	4	6	48.8	48.8	48.8	9.1275	80	80	0	11.434	0	0	0	36.2	36.2	48.8	31483000	0	0	0	7651600	6664400
Q92499	Q92499	6	6	6	ATP-dependent RNA helicase DDX1	DDX1	sp|Q92499|DDX1_HUMAN ATP-dependent RNA helicase DDX1 OS=Homo sapiens OX=9606 GN=DDX1 PE=1 SV=2	1	6	6	6	0	0	0	3	5	3	0	0	0	3	5	3	0	0	0	3	5	3	16.8	16.8	16.8	82.431	740	740	0	17.632	0	0	0	8.2	13.1	11.4	30848000	0	0	0	7959200	16541000
O15371	O15371	6	6	6	Eukaryotic translation initiation factor 3 subunit D	EIF3D	sp|O15371|EIF3D_HUMAN Eukaryotic translation initiation factor 3 subunit D OS=Homo sapiens OX=9606 GN=EIF3D PE=1 SV=1	1	6	6	6	0	0	0	5	4	3	0	0	0	5	4	3	0	0	0	5	4	3	19.3	19.3	19.3	63.972	548	548	0	16.651	0	0	0	14.8	12.2	9.3	30283000	0	0	0	12448000	9358000
Q8WYA6	Q8WYA6	6	6	6	Beta-catenin-like protein 1	CTNNBL1	sp|Q8WYA6|CTBL1_HUMAN Beta-catenin-like protein 1 OS=Homo sapiens OX=9606 GN=CTNNBL1 PE=1 SV=1	1	6	6	6	0	0	0	4	3	3	0	0	0	4	3	3	0	0	0	4	3	3	17.2	17.2	17.2	65.173	563	563	0	28.889	0	0	0	13	8.9	7.3	29943000	0	0	0	11578000	11424000
Q9NX58	Q9NX58	4	4	4	Cell growth-regulating nucleolar protein	LYAR	sp|Q9NX58|LYAR_HUMAN Cell growth-regulating nucleolar protein OS=Homo sapiens OX=9606 GN=LYAR PE=1 SV=2	1	4	4	4	0	0	0	3	2	4	0	0	0	3	2	4	0	0	0	3	2	4	11.1	11.1	11.1	43.614	379	379	0	25.091	0	0	0	7.4	7.1	11.1	29806000	0	0	0	9527700	6362500
Q9P2N5	Q9P2N5	4	4	4	RNA-binding protein 27	RBM27	sp|Q9P2N5|RBM27_HUMAN RNA-binding protein 27 OS=Homo sapiens OX=9606 GN=RBM27 PE=1 SV=2	1	4	4	4	0	0	0	2	2	3	0	0	0	2	2	3	0	0	0	2	2	3	8.8	8.8	8.8	118.72	1060	1060	0	50.457	0	0	0	4.2	4.2	5.5	29215000	0	0	0	5027300	5747300
Q8WXA9	Q8WXA9	3	3	3	Splicing regulatory glutamine/lysine-rich protein 1	SREK1	sp|Q8WXA9|SREK1_HUMAN Splicing regulatory glutamine/lysine-rich protein 1 OS=Homo sapiens OX=9606 GN=SREK1 PE=1 SV=1	1	3	3	3	0	0	0	2	3	1	0	0	0	2	3	1	0	0	0	2	3	1	7.1	7.1	7.1	59.38	508	508	0	10.953	0	0	0	4.3	7.1	4.3	29028000	0	0	0	10777000	9230200
O14979	O14979	4	4	4	Heterogeneous nuclear ribonucleoprotein D-like	HNRNPDL	sp|O14979|HNRDL_HUMAN Heterogeneous nuclear ribonucleoprotein D-like OS=Homo sapiens OX=9606 GN=HNRNPDL PE=1 SV=3	1	4	4	4	0	0	0	3	2	4	0	0	0	3	2	4	0	0	0	3	2	4	12.6	12.6	12.6	46.437	420	420	0	13.644	0	0	0	8.6	8.3	12.6	28557000	0	0	0	8314400	4038400
Q05519	Q05519	5	5	5	Serine/arginine-rich splicing factor 11	SRSF11	sp|Q05519|SRS11_HUMAN Serine/arginine-rich splicing factor 11 OS=Homo sapiens OX=9606 GN=SRSF11 PE=1 SV=1	1	5	5	5	0	0	0	1	3	2	0	0	0	1	3	2	0	0	0	1	3	2	13.4	13.4	13.4	53.542	484	484	0	15.045	0	0	0	2.7	10.7	2.7	28506000	0	0	0	7563500	10839000
O75940	O75940	2	2	2	Survival of motor neuron-related-splicing factor 30	SMNDC1	sp|O75940|SPF30_HUMAN Survival of motor neuron-related-splicing factor 30 OS=Homo sapiens OX=9606 GN=SMNDC1 PE=1 SV=1	1	2	2	2	0	0	0	1	2	0	0	0	0	1	2	0	0	0	0	1	2	0	15.5	15.5	15.5	26.711	238	238	0	6.6968	0	0	0	5	15.5	0	28420000	0	0	0	6217600	22202000
Q9Y314	Q9Y314	4	4	4	Nitric oxide synthase-interacting protein	NOSIP	sp|Q9Y314|NOSIP_HUMAN Nitric oxide synthase-interacting protein OS=Homo sapiens OX=9606 GN=NOSIP PE=1 SV=1	1	4	4	4	0	0	0	2	1	4	0	0	0	2	1	4	0	0	0	2	1	4	24.3	24.3	24.3	33.172	301	301	0	17.91	0	0	0	14.6	8.6	24.3	28054000	0	0	0	7184100	6855700
Q6P1X5	Q6P1X5	2	2	2	Transcription initiation factor TFIID subunit 2	TAF2	sp|Q6P1X5|TAF2_HUMAN Transcription initiation factor TFIID subunit 2 OS=Homo sapiens OX=9606 GN=TAF2 PE=1 SV=3	1	2	2	2	0	0	0	1	2	2	0	0	0	1	2	2	0	0	0	1	2	2	3	3	3	136.97	1199	1199	0	9.6043	0	0	0	2.3	3	3	27591000	0	0	0	7242300	7919200
Q6AI12	Q6AI12	1	1	1	Ankyrin repeat domain-containing protein 40	ANKRD40	sp|Q6AI12|ANR40_HUMAN Ankyrin repeat domain-containing protein 40 OS=Homo sapiens OX=9606 GN=ANKRD40 PE=1 SV=2	1	1	1	1	0	0	0	1	1	1	0	0	0	1	1	1	0	0	0	1	1	1	3.5	3.5	3.5	41.088	368	368	0	9.9514	0	0	0	3.5	3.5	3.5	27404000	0	0	0	6625600	9938700
P62310	P62310	2	2	2	U6 snRNA-associated Sm-like protein LSm3	LSM3	sp|P62310|LSM3_HUMAN U6 snRNA-associated Sm-like protein LSm3 OS=Homo sapiens OX=9606 GN=LSM3 PE=1 SV=2	1	2	2	2	0	0	0	2	2	2	0	0	0	2	2	2	0	0	0	2	2	2	34.3	34.3	34.3	11.845	102	102	0	30.862	0	0	0	34.3	34.3	34.3	27270000	0	0	0	7578400	12436000
Q6P1J9	Q6P1J9	6	6	6	Parafibromin	CDC73	sp|Q6P1J9|CDC73_HUMAN Parafibromin OS=Homo sapiens OX=9606 GN=CDC73 PE=1 SV=1	1	6	6	6	0	0	0	2	3	5	0	0	0	2	3	5	0	0	0	2	3	5	14.7	14.7	14.7	60.576	531	531	0	15.648	0	0	0	6.2	8.1	12.8	27240000	0	0	0	4480100	8912000
Q56P03	Q56P03	2	2	2	E2F-associated phosphoprotein	EAPP	sp|Q56P03|EAPP_HUMAN E2F-associated phosphoprotein OS=Homo sapiens OX=9606 GN=EAPP PE=1 SV=4	1	2	2	2	0	0	0	1	2	2	0	0	0	1	2	2	0	0	0	1	2	2	15.8	15.8	15.8	32.762	285	285	0	12.192	0	0	0	10.2	15.8	15.8	27132000	0	0	0	4811300	10036000
P21333	P21333	10	10	10	Filamin-A	FLNA	sp|P21333|FLNA_HUMAN Filamin-A OS=Homo sapiens OX=9606 GN=FLNA PE=1 SV=4	1	10	10	10	10	4	1	1	3	4	10	4	1	1	3	4	10	4	1	1	3	4	8.4	8.4	8.4	280.74	2647	2647	0	58.463	8.4	3.8	1.2	1.1	2.9	3.3	50324000	14763000	4782900	4083800	3406500	13968000
Q16637	Q16637	2	2	2	Survival motor neuron protein	SMN1	sp|Q16637|SMN_HUMAN Survival motor neuron protein OS=Homo sapiens OX=9606 GN=SMN2 PE=1 SV=1	1	2	2	2	0	0	0	2	1	2	0	0	0	2	1	2	0	0	0	2	1	2	13.3	13.3	13.3	31.848	294	294	0	10.768	0	0	0	13.3	6.1	13.3	26243000	0	0	0	4634700	7037400
Q01130	Q01130	5	4	4	Serine/arginine-rich splicing factor 2	SRSF2	sp|Q01130|SRSF2_HUMAN Serine/arginine-rich splicing factor 2 OS=Homo sapiens OX=9606 GN=SRSF2 PE=1 SV=4	1	5	4	4	0	0	0	2	4	2	0	0	0	1	3	1	0	0	0	1	3	1	29	25.3	25.3	25.476	221	221	0	21.843	0	0	0	12.7	27.6	14	26098000	0	0	0	5877400	13867000
O95872	O95872	4	4	4	G patch domain and ankyrin repeat-containing protein 1	GPANK1	sp|O95872|GPAN1_HUMAN G patch domain and ankyrin repeat-containing protein 1 OS=Homo sapiens OX=9606 GN=GPANK1 PE=1 SV=1	1	4	4	4	0	0	0	3	4	3	0	0	0	3	4	3	0	0	0	3	4	3	19.4	19.4	19.4	39.314	356	356	0	23.564	0	0	0	19.4	19.4	19.4	26006000	0	0	0	5794600	8494400
P63162;P14678	P63162;P14678	2;2	2;2	2;2	Small nuclear ribonucleoprotein-associated protein N;Small nuclear ribonucleoprotein-associated proteins B and B	SNRPN;SNRPB	sp|P63162|RSMN_HUMAN Small nuclear ribonucleoprotein-associated protein N OS=Homo sapiens OX=9606 GN=SNRPN PE=1 SV=1;sp|P14678|RSMB_HUMAN Small nuclear ribonucleoprotein-associated proteins B and B OS=Homo sapiens OX=9606 GN=SNRPB PE=1 SV=2	2	2	2	2	0	0	0	2	2	2	0	0	0	2	2	2	0	0	0	2	2	2	6.2	6.2	6.2	24.614	240	240;240	0.00246	2.6292	0	0	0	6.2	6.2	6.2	25848000	0	0	0	11012000	8560800
P49759	P49759	3	3	3	Dual specificity protein kinase CLK1	CLK1	sp|P49759|CLK1_HUMAN Dual specificity protein kinase CLK1 OS=Homo sapiens OX=9606 GN=CLK1 PE=1 SV=2	1	3	3	3	0	0	0	3	3	2	0	0	0	3	3	2	0	0	0	3	3	2	9.1	9.1	9.1	57.29	484	484	0	7.583	0	0	0	9.1	9.1	7.4	25751000	0	0	0	8230600	12198000
Q9P2K5	Q9P2K5	2	2	2	Myelin expression factor 2	MYEF2	sp|Q9P2K5|MYEF2_HUMAN Myelin expression factor 2 OS=Homo sapiens OX=9606 GN=MYEF2 PE=1 SV=3	1	2	2	2	0	0	0	1	1	2	0	0	0	1	1	2	0	0	0	1	1	2	5.7	5.7	5.7	64.121	600	600	0	4.9739	0	0	0	1.7	1.7	5.7	25169000	0	0	0	11119000	4711900
Q9NP64	Q9NP64	2	2	2	Nucleolar protein of 40 kDa	ZCCHC17	sp|Q9NP64|NO40_HUMAN Nucleolar protein of 40 kDa OS=Homo sapiens OX=9606 GN=ZCCHC17 PE=1 SV=1	1	2	2	2	0	0	0	2	1	1	0	0	0	2	1	1	0	0	0	2	1	1	14.5	14.5	14.5	27.569	241	241	0	7.856	0	0	0	14.5	9.1	9.1	25158000	0	0	0	6169300	13284000
Q9HCM4	Q9HCM4	3	3	3	Band 4.1-like protein 5	EPB41L5	sp|Q9HCM4|E41L5_HUMAN Band 4.1-like protein 5 OS=Homo sapiens OX=9606 GN=EPB41L5 PE=1 SV=3	1	3	3	3	0	0	0	2	2	3	0	0	0	2	2	3	0	0	0	2	2	3	7.1	7.1	7.1	81.855	733	733	0	12.658	0	0	0	7.1	7.1	7.1	25014000	0	0	0	6577000	8490300
P08238;Q58FF7;P14625	P08238	8;2;2	8;2;2	7;1;2	Heat shock protein HSP 90-beta	HSP90AB1	sp|P08238|HS90B_HUMAN Heat shock protein HSP 90-beta OS=Homo sapiens OX=9606 GN=HSP90AB1 PE=1 SV=4	3	8	8	7	3	1	2	3	2	3	3	1	2	3	2	3	3	1	2	2	2	3	17.8	17.8	15.6	83.263	724	724;597;803	0	118.6	9.5	3.7	2.6	5.7	4.3	6.4	45425000	11119000	8585300	846990	9626800	6535700
Q69YN4	Q69YN4	4	4	4	Protein virilizer homolog	KIAA1429	sp|Q69YN4|VIR_HUMAN Protein virilizer homolog OS=Homo sapiens OX=9606 GN=VIRMA PE=1 SV=2	1	4	4	4	0	0	0	2	2	1	0	0	0	2	2	1	0	0	0	2	2	1	2.6	2.6	2.6	202.02	1812	1812	0	5.9238	0	0	0	1.5	1.7	0.6	24838000	0	0	0	14298000	7515900
O75487	O75487	5	5	5	Glypican-4;Secreted glypican-4	GPC4	sp|O75487|GPC4_HUMAN Glypican-4 OS=Homo sapiens OX=9606 GN=GPC4 PE=1 SV=4	1	5	5	5	2	0	0	3	3	3	2	0	0	3	3	3	2	0	0	3	3	3	17.4	17.4	17.4	62.411	556	556	0	15.755	5.4	0	0	8.5	11.7	8.6	25233000	550400	0	0	9975000	10058000
Q96GM8	Q96GM8	4	4	4	Target of EGR1 protein 1	TOE1	sp|Q96GM8|TOE1_HUMAN Target of EGR1 protein 1 OS=Homo sapiens OX=9606 GN=TOE1 PE=1 SV=1	1	4	4	4	0	0	0	3	3	2	0	0	0	3	3	2	0	0	0	3	3	2	12.5	12.5	12.5	56.547	510	510	0	17.913	0	0	0	9	10.8	7.3	24560000	0	0	0	6920900	10102000
Q13506	Q13506	1	1	1	NGFI-A-binding protein 1	NAB1	sp|Q13506|NAB1_HUMAN NGFI-A-binding protein 1 OS=Homo sapiens OX=9606 GN=NAB1 PE=1 SV=2	1	1	1	1	0	0	0	1	0	0	0	0	0	1	0	0	0	0	0	1	0	0	2.9	2.9	2.9	54.401	487	487	0.002448	2.5655	0	0	0	2.9	0	0	24451000	0	0	0	24451000	0
Q92733	Q92733	5	5	5	Proline-rich protein PRCC	PRCC	sp|Q92733|PRCC_HUMAN Proline-rich protein PRCC OS=Homo sapiens OX=9606 GN=PRCC PE=1 SV=1	1	5	5	5	0	0	0	3	2	4	0	0	0	3	2	4	0	0	0	3	2	4	18.5	18.5	18.5	52.417	491	491	0	21.443	0	0	0	10.8	6.9	15.9	23098000	0	0	0	6488000	4750900
Q9HDC5	Q9HDC5	3	3	3	Junctophilin-1	JPH1	sp|Q9HDC5|JPH1_HUMAN Junctophilin-1 OS=Homo sapiens OX=9606 GN=JPH1 PE=1 SV=2	1	3	3	3	0	0	0	1	2	3	0	0	0	1	2	3	0	0	0	1	2	3	8.2	8.2	8.2	71.685	661	661	0	9.586	0	0	0	2.3	5.4	8.2	22767000	0	0	0	1749800	6958200
P30041	P30041	2	2	2	Peroxiredoxin-6	PRDX6	sp|P30041|PRDX6_HUMAN Peroxiredoxin-6 OS=Homo sapiens OX=9606 GN=PRDX6 PE=1 SV=3	1	2	2	2	2	2	2	1	0	0	2	2	2	1	0	0	2	2	2	1	0	0	13.8	13.8	13.8	25.035	224	224	0	94.695	13.8	13.8	13.8	8.5	0	0	137540000	66623000	22766000	25516000	22633000	0
Q8IWS0	Q8IWS0	3	3	3	PHD finger protein 6	PHF6	sp|Q8IWS0|PHF6_HUMAN PHD finger protein 6 OS=Homo sapiens OX=9606 GN=PHF6 PE=1 SV=1	1	3	3	3	0	0	0	1	2	2	0	0	0	1	2	2	0	0	0	1	2	2	18.4	18.4	18.4	41.29	365	365	0	26.61	0	0	0	4.9	9.9	13.4	22618000	0	0	0	5196600	6919800
P24666	P24666	3	3	3	Low molecular weight phosphotyrosine protein phosphatase	ACP1	sp|P24666|PPAC_HUMAN Low molecular weight phosphotyrosine protein phosphatase OS=Homo sapiens OX=9606 GN=ACP1 PE=1 SV=3	1	3	3	3	0	0	1	3	1	3	0	0	1	3	1	3	0	0	1	3	1	3	36.7	36.7	36.7	18.042	158	158	0	11.65	0	0	5.7	36.7	7.6	36.7	22709000	0	0	517150	7862000	4028400
Q6IS14;P63241	Q6IS14;P63241	3;3	3;3	3;3	Eukaryotic translation initiation factor 5A-1-like;Eukaryotic translation initiation factor 5A-1	EIF5AL1;EIF5A	sp|Q6IS14|IF5AL_HUMAN Eukaryotic translation initiation factor 5A-1-like OS=Homo sapiens OX=9606 GN=EIF5AL1 PE=2 SV=2;sp|P63241|IF5A1_HUMAN Eukaryotic translation initiation factor 5A-1 OS=Homo sapiens OX=9606 GN=EIF5A PE=1 SV=2	2	3	3	3	0	1	1	2	2	2	0	1	1	2	2	2	0	1	1	2	2	2	35.7	35.7	35.7	16.773	154	154;154	0	173.18	0	18.8	18.8	16.9	16.9	16.9	58377000	0	21993000	14677000	6916900	9160800
P39019	P39019	6	6	6	40S ribosomal protein S19	RPS19	sp|P39019|RS19_HUMAN 40S ribosomal protein S19 OS=Homo sapiens OX=9606 GN=RPS19 PE=1 SV=2	1	6	6	6	0	0	0	1	0	6	0	0	0	1	0	6	0	0	0	1	0	6	35.2	35.2	35.2	16.06	145	145	0	83.136	0	0	0	10.3	0	35.2	21704000	0	0	0	4311400	0
Q9Y4Y9	Q9Y4Y9	1	1	1	U6 snRNA-associated Sm-like protein LSm5	LSM5	sp|Q9Y4Y9|LSM5_HUMAN U6 snRNA-associated Sm-like protein LSm5 OS=Homo sapiens OX=9606 GN=LSM5 PE=1 SV=3	1	1	1	1	0	0	0	0	0	1	0	0	0	0	0	1	0	0	0	0	0	1	26.4	26.4	26.4	9.9374	91	91	0	5.605	0	0	0	0	0	26.4	21692000	0	0	0	0	0
O76021	O76021	4	4	4	Ribosomal L1 domain-containing protein 1	RSL1D1	sp|O76021|RL1D1_HUMAN Ribosomal L1 domain-containing protein 1 OS=Homo sapiens OX=9606 GN=RSL1D1 PE=1 SV=3	1	4	4	4	0	0	0	2	2	3	0	0	0	2	2	3	0	0	0	2	2	3	11.6	11.6	11.6	54.972	490	490	0	16.374	0	0	0	9.4	7.1	11.4	21597000	0	0	0	5080900	6566400
Q96T58	Q96T58	8	8	8	Msx2-interacting protein	SPEN	sp|Q96T58|MINT_HUMAN Msx2-interacting protein OS=Homo sapiens OX=9606 GN=SPEN PE=1 SV=1	1	8	8	8	0	0	0	4	3	3	0	0	0	4	3	3	0	0	0	4	3	3	3.1	3.1	3.1	402.24	3664	3664	0	24.374	0	0	0	1.9	1.7	1.1	21231000	0	0	0	7574000	8542300
Q9Y3Q0	Q9Y3Q0	2	2	2	N-acetylated-alpha-linked acidic dipeptidase 2	NAALAD2	sp|Q9Y3Q0|NALD2_HUMAN N-acetylated-alpha-linked acidic dipeptidase 2 OS=Homo sapiens OX=9606 GN=NAALAD2 PE=1 SV=1	1	2	2	2	0	0	0	1	0	2	0	0	0	1	0	2	0	0	0	1	0	2	4.9	4.9	4.9	83.59	740	740	0.002457	2.6045	0	0	0	2.2	0	4.9	20893000	0	0	0	1392300	0
Q8N1G2	Q8N1G2	4	4	4	Cap-specific mRNA (nucleoside-2-O-)-methyltransferase 1	CMTR1	sp|Q8N1G2|CMTR1_HUMAN Cap-specific mRNA (nucleoside-2-O-)-methyltransferase 1 OS=Homo sapiens OX=9606 GN=CMTR1 PE=1 SV=1	1	4	4	4	0	0	0	3	4	2	0	0	0	3	4	2	0	0	0	3	4	2	8.3	8.3	8.3	95.32	835	835	0	19.451	0	0	0	6.6	8.3	4.1	20614000	0	0	0	6471400	8178300
Q9BZI7	Q9BZI7	5	5	5	Regulator of nonsense transcripts 3B	UPF3B	sp|Q9BZI7|REN3B_HUMAN Regulator of nonsense transcripts 3B OS=Homo sapiens OX=9606 GN=UPF3B PE=1 SV=1	1	5	5	5	0	0	0	1	2	5	0	0	0	1	2	5	0	0	0	1	2	5	10.6	10.6	10.6	57.761	483	483	0	12.989	0	0	0	2.1	5.4	10.6	20478000	0	0	0	1437400	4296400
Q9NXE8	Q9NXE8	4	4	4	Pre-mRNA-splicing factor CWC25 homolog	CWC25	sp|Q9NXE8|CWC25_HUMAN Pre-mRNA-splicing factor CWC25 homolog OS=Homo sapiens OX=9606 GN=CWC25 PE=1 SV=1	1	4	4	4	0	0	0	2	2	4	0	0	0	2	2	4	0	0	0	2	2	4	14.1	14.1	14.1	49.647	425	425	0	14.042	0	0	0	6.4	8.5	14.1	20173000	0	0	0	4351400	6044300
Q99590	Q99590	2	2	2	Protein SCAF11	SCAF11	sp|Q99590|SCAFB_HUMAN Protein SCAF11 OS=Homo sapiens OX=9606 GN=SCAF11 PE=1 SV=2	1	2	2	2	0	0	0	2	1	1	0	0	0	2	1	1	0	0	0	2	1	1	1.8	1.8	1.8	164.65	1463	1463	0	5.385	0	0	0	1.8	0.9	0.9	19978000	0	0	0	10749000	3419000
Q9BYW2	Q9BYW2	3	3	3	Histone-lysine N-methyltransferase SETD2	SETD2	sp|Q9BYW2|SETD2_HUMAN Histone-lysine N-methyltransferase SETD2 OS=Homo sapiens OX=9606 GN=SETD2 PE=1 SV=3	1	3	3	3	0	0	0	2	3	2	0	0	0	2	3	2	0	0	0	2	3	2	2.3	2.3	2.3	287.59	2564	2564	0	11.644	0	0	0	1.6	2.3	1.8	19828000	0	0	0	5803900	7844100
O00425	O00425	5	3	3	Insulin-like growth factor 2 mRNA-binding protein 3	IGF2BP3	sp|O00425|IF2B3_HUMAN Insulin-like growth factor 2 mRNA-binding protein 3 OS=Homo sapiens OX=9606 GN=IGF2BP3 PE=1 SV=2	1	5	3	3	1	1	0	2	4	1	0	0	0	2	2	0	0	0	0	2	2	0	13.5	9.5	9.5	63.704	579	579	0	12.524	2.2	2.2	0	5.2	11.1	1.7	19705000	0	0	0	13858000	5846100
Q96S94	Q96S94	1	1	1	Cyclin-L2	CCNL2	sp|Q96S94|CCNL2_HUMAN Cyclin-L2 OS=Homo sapiens OX=9606 GN=CCNL2 PE=1 SV=1	1	1	1	1	0	0	0	1	1	1	0	0	0	1	1	1	0	0	0	1	1	1	4	4	4	58.147	520	520	0	7.0832	0	0	0	4	4	4	19670000	0	0	0	5196700	7082100
P02545	P02545	4	4	4	Prelamin-A/C;Lamin-A/C	LMNA	sp|P02545|LMNA_HUMAN Prelamin-A/C OS=Homo sapiens OX=9606 GN=LMNA PE=1 SV=1	1	4	4	4	1	1	1	3	3	1	1	1	1	3	3	1	1	1	1	3	3	1	13.3	13.3	13.3	74.139	664	664	0	8.4336	2.6	2.6	2.6	11	6.9	2.6	23489000	1076200	1813500	960050	8305000	6747200
O95831	O95831	5	5	5	Apoptosis-inducing factor 1, mitochondrial	AIFM1	sp|O95831|AIFM1_HUMAN Apoptosis-inducing factor 1, mitochondrial OS=Homo sapiens OX=9606 GN=AIFM1 PE=1 SV=1	1	5	5	5	0	0	0	2	4	0	0	0	0	2	4	0	0	0	0	2	4	0	13.5	13.5	13.5	66.9	613	613	0	15.071	0	0	0	7.7	11.7	0	19452000	0	0	0	8786000	10666000
Q9UPP1;O75151	Q9UPP1;O75151	2;1	2;1	2;1	Histone lysine demethylase PHF8;Lysine-specific demethylase PHF2	PHF8;PHF2	sp|Q9UPP1|PHF8_HUMAN Histone lysine demethylase PHF8 OS=Homo sapiens OX=9606 GN=PHF8 PE=1 SV=3;sp|O75151|PHF2_HUMAN Lysine-specific demethylase PHF2 OS=Homo sapiens OX=9606 GN=PHF2 PE=1 SV=4	2	2	2	2	0	0	0	2	1	1	0	0	0	2	1	1	0	0	0	2	1	1	2.9	2.9	2.9	117.86	1060	1060;1096	0	4.0481	0	0	0	2.9	1.3	1.3	19014000	0	0	0	17628000	0
O43684	O43684	3	3	3	Mitotic checkpoint protein BUB3	BUB3	sp|O43684|BUB3_HUMAN Mitotic checkpoint protein BUB3 OS=Homo sapiens OX=9606 GN=BUB3 PE=1 SV=1	1	3	3	3	0	0	0	1	2	3	0	0	0	1	2	3	0	0	0	1	2	3	16.5	16.5	16.5	37.154	328	328	0	7.4253	0	0	0	4.6	4.6	16.5	18814000	0	0	0	2019600	3449100
O75607	O75607	1	1	1	Nucleoplasmin-3	NPM3	sp|O75607|NPM3_HUMAN Nucleoplasmin-3 OS=Homo sapiens OX=9606 GN=NPM3 PE=1 SV=3	1	1	1	1	0	1	0	0	1	0	0	1	0	0	1	0	0	1	0	0	1	0	9	9	9	19.343	178	178	0	39.077	0	9	0	0	9	0	18389000	0	0	0	0	18389000
P49750	P49750	2	2	2	YLP motif-containing protein 1	YLPM1	sp|P49750|YLPM1_HUMAN YLP motif-containing protein 1 OS=Homo sapiens OX=9606 GN=YLPM1 PE=1 SV=4	1	2	2	2	0	0	0	1	2	2	0	0	0	1	2	2	0	0	0	1	2	2	2.4	2.4	2.4	241.64	2146	2146	0	23.693	0	0	0	1.6	2.4	2.4	18290000	0	0	0	4611300	5259000
Q15388	Q15388	1	1	1	Mitochondrial import receptor subunit TOM20 homolog	TOMM20	sp|Q15388|TOM20_HUMAN Mitochondrial import receptor subunit TOM20 homolog OS=Homo sapiens OX=9606 GN=TOMM20 PE=1 SV=1	1	1	1	1	1	1	1	0	1	1	1	1	1	0	1	1	1	1	1	0	1	1	9	9	9	16.298	145	145	0	5.1481	9	9	9	0	9	9	24662000	2367500	2347200	1716800	0	10123000
Q86UK7	Q86UK7	2	2	2	Zinc finger protein 598	ZNF598	sp|Q86UK7|ZN598_HUMAN E3 ubiquitin-protein ligase ZNF598 OS=Homo sapiens OX=9606 GN=ZNF598 PE=1 SV=1	1	2	2	2	0	0	0	2	1	2	0	0	0	2	1	2	0	0	0	2	1	2	8.1	8.1	8.1	98.636	904	904	0	7.6297	0	0	0	8.1	4.1	8.1	17869000	0	0	0	6240300	3783600
P35268	P35268	3	3	3	60S ribosomal protein L22	RPL22	sp|P35268|RL22_HUMAN 60S ribosomal protein L22 OS=Homo sapiens OX=9606 GN=RPL22 PE=1 SV=2	1	3	3	3	0	0	0	2	2	1	0	0	0	2	2	1	0	0	0	2	2	1	19.5	19.5	19.5	14.787	128	128	0	5.4874	0	0	0	19.5	18.8	10.2	17737000	0	0	0	4995000	5453300
Q7L2E3	Q7L2E3	4	4	4	Putative ATP-dependent RNA helicase DHX30	DHX30	sp|Q7L2E3|DHX30_HUMAN ATP-dependent RNA helicase DHX30 OS=Homo sapiens OX=9606 GN=DHX30 PE=1 SV=1	1	4	4	4	0	0	0	2	3	3	0	0	0	2	3	3	0	0	0	2	3	3	4.2	4.2	4.2	133.94	1194	1194	0	6.6475	0	0	0	2.3	2.8	3	17692000	0	0	0	5335400	2768500
P43250;P34947	P43250;P34947	1;1	1;1	1;1	G protein-coupled receptor kinase 6;G protein-coupled receptor kinase 5	GRK6;GRK5	sp|P43250|GRK6_HUMAN G protein-coupled receptor kinase 6 OS=Homo sapiens OX=9606 GN=GRK6 PE=1 SV=2;sp|P34947|GRK5_HUMAN G protein-coupled receptor kinase 5 OS=Homo sapiens OX=9606 GN=GRK5 PE=1 SV=1	2	1	1	1	0	0	0	1	1	1	0	0	0	1	1	1	0	0	0	1	1	1	2.4	2.4	2.4	65.99	576	576;590	0	47.712	0	0	0	2.4	2.4	2.4	17491000	0	0	0	5327100	5803300
Q96BK5	Q96BK5	2	2	2	PIN2/TERF1-interacting telomerase inhibitor 1	PINX1	sp|Q96BK5|PINX1_HUMAN PIN2/TERF1-interacting telomerase inhibitor 1 OS=Homo sapiens OX=9606 GN=PINX1 PE=1 SV=2	1	2	2	2	0	0	0	2	2	2	0	0	0	2	2	2	0	0	0	2	2	2	11.9	11.9	11.9	37.034	328	328	0	7.7624	0	0	0	11.9	11.9	11.9	17475000	0	0	0	5396600	4845500
Q9H2P0	Q9H2P0	3	3	3	Activity-dependent neuroprotector homeobox protein	ADNP	sp|Q9H2P0|ADNP_HUMAN Activity-dependent neuroprotector homeobox protein OS=Homo sapiens OX=9606 GN=ADNP PE=1 SV=1	1	3	3	3	0	0	0	2	2	2	0	0	0	2	2	2	0	0	0	2	2	2	5.3	5.3	5.3	123.56	1102	1102	0	9.9418	0	0	0	4.3	3.5	4.3	17456000	0	0	0	6511800	3816900
P78356	P78356	6	6	4	Phosphatidylinositol 5-phosphate 4-kinase type-2 beta	PIP4K2B	sp|P78356|PI42B_HUMAN Phosphatidylinositol 5-phosphate 4-kinase type-2 beta OS=Homo sapiens OX=9606 GN=PIP4K2B PE=1 SV=1	1	6	6	4	0	0	0	2	5	4	0	0	0	2	5	4	0	0	0	0	3	2	20.9	20.9	14.4	47.377	416	416	0	14.556	0	0	0	6.5	18.5	13.5	16988000	0	0	0	2227000	8313900
Q9NQ29	Q9NQ29	6	3	3	Putative RNA-binding protein Luc7-like 1	LUC7L	sp|Q9NQ29|LUC7L_HUMAN Putative RNA-binding protein Luc7-like 1 OS=Homo sapiens OX=9606 GN=LUC7L PE=1 SV=1	1	6	3	3	0	0	0	4	5	6	0	0	0	1	2	3	0	0	0	1	2	3	13.5	5.1	5.1	43.727	371	371	0	10.838	0	0	0	12.9	12.9	13.5	16972000	0	0	0	2683600	5773200
Q8TDN6	Q8TDN6	1	1	1	Ribosome biogenesis protein BRX1 homolog	BRIX1	sp|Q8TDN6|BRX1_HUMAN Ribosome biogenesis protein BRX1 homolog OS=Homo sapiens OX=9606 GN=BRIX1 PE=1 SV=2	1	1	1	1	0	0	0	1	1	1	0	0	0	1	1	1	0	0	0	1	1	1	8.8	8.8	8.8	41.401	353	353	0	5.0894	0	0	0	8.8	8.8	8.8	16829000	0	0	0	6980800	6492600
P08579	P08579	4	4	4	U2 small nuclear ribonucleoprotein B	SNRPB2	sp|P08579|RU2B_HUMAN U2 small nuclear ribonucleoprotein B OS=Homo sapiens OX=9606 GN=SNRPB2 PE=1 SV=1	1	4	4	4	0	0	0	0	4	4	0	0	0	0	4	4	0	0	0	0	4	4	24.4	24.4	24.4	25.486	225	225	0	14.285	0	0	0	0	24.4	24.4	16345000	0	0	0	0	8156300
Q6PCB5;Q5VWQ0	Q6PCB5	4;1	4;1	4;1	Round spermatid basic protein 1-like protein	RSBN1L	sp|Q6PCB5|RSBNL_HUMAN Round spermatid basic protein 1-like protein OS=Homo sapiens OX=9606 GN=RSBN1L PE=1 SV=2	2	4	4	4	0	0	0	0	3	4	0	0	0	0	3	4	0	0	0	0	3	4	10	10	10	94.868	846	846;802	0	10.517	0	0	0	0	8.5	10	16319000	0	0	0	0	5471300
P23588	P23588	2	2	2	Eukaryotic translation initiation factor 4B	EIF4B	sp|P23588|IF4B_HUMAN Eukaryotic translation initiation factor 4B OS=Homo sapiens OX=9606 GN=EIF4B PE=1 SV=2	1	2	2	2	0	0	0	1	1	2	0	0	0	1	1	2	0	0	0	1	1	2	3.9	3.9	3.9	69.15	611	611	0	3.0778	0	0	0	1.3	1.3	3.9	16317000	0	0	0	3525900	3266700
Q3MHD2	Q3MHD2	2	2	2	Protein LSM12 homolog	LSM12	sp|Q3MHD2|LSM12_HUMAN Protein LSM12 homolog OS=Homo sapiens OX=9606 GN=LSM12 PE=1 SV=2	1	2	2	2	0	0	0	2	2	1	0	0	0	2	2	1	0	0	0	2	2	1	15.4	15.4	15.4	21.701	195	195	0	6.1726	0	0	0	15.4	15.4	6.7	16274000	0	0	0	5061800	6098000
P22061	P22061	3	3	3	Protein-L-isoaspartate(D-aspartate) O-methyltransferase	PCMT1	sp|P22061|PIMT_HUMAN Protein-L-isoaspartate(D-aspartate) O-methyltransferase OS=Homo sapiens OX=9606 GN=PCMT1 PE=1 SV=4	1	3	3	3	0	0	1	0	2	3	0	0	1	0	2	3	0	0	1	0	2	3	33.9	33.9	33.9	24.636	227	227	0	18.627	0	0	15	0	26.4	33.9	18142000	0	0	1875600	0	7670800
Q9HAZ1	Q9HAZ1	2	2	2	Dual specificity protein kinase CLK4	CLK4	sp|Q9HAZ1|CLK4_HUMAN Dual specificity protein kinase CLK4 OS=Homo sapiens OX=9606 GN=CLK4 PE=1 SV=1	1	2	2	2	0	0	0	1	1	1	0	0	0	1	1	1	0	0	0	1	1	1	7.3	7.3	7.3	57.491	481	481	0	19.271	0	0	0	4	4	3.3	16254000	0	0	0	3128700	6032500
P22234	P22234	2	2	2	Multifunctional protein ADE2;Phosphoribosylaminoimidazole-succinocarboxamide synthase;Phosphoribosylaminoimidazole carboxylase	PAICS	sp|P22234|PUR6_HUMAN Multifunctional protein ADE2 OS=Homo sapiens OX=9606 GN=PAICS PE=1 SV=3	1	2	2	2	2	1	1	1	2	1	2	1	1	1	2	1	2	1	1	1	2	1	2.6	2.6	2.6	47.079	425	425	0	15.611	2.6	2.6	2.6	2.6	2.6	2.6	19415000	1986100	0	1340400	5558100	4848500
P48730	P48730	3	3	3	Casein kinase I isoform delta	CSNK1D	sp|P48730|KC1D_HUMAN Casein kinase I isoform delta OS=Homo sapiens OX=9606 GN=CSNK1D PE=1 SV=2	1	3	3	3	0	0	0	2	2	2	0	0	0	2	2	2	0	0	0	2	2	2	8	8	8	47.33	415	415	0	8.0542	0	0	0	4.6	6.7	4.6	15964000	0	0	0	5723800	3950200
Q9NZB2	Q9NZB2	2	2	2	Constitutive coactivator of PPAR-gamma-like protein 1	FAM120A	sp|Q9NZB2|F120A_HUMAN Constitutive coactivator of PPAR-gamma-like protein 1 OS=Homo sapiens OX=9606 GN=FAM120A PE=1 SV=2	1	2	2	2	0	0	0	2	1	2	0	0	0	2	1	2	0	0	0	2	1	2	2	2	2	121.89	1118	1118	0	8.9848	0	0	0	2	1.2	2	15910000	0	0	0	6097800	3000800
Q99661;Q8N4N8	Q99661	6;1	5;1	5;1	Kinesin-like protein KIF2C	KIF2C	sp|Q99661|KIF2C_HUMAN Kinesin-like protein KIF2C OS=Homo sapiens OX=9606 GN=KIF2C PE=1 SV=2	2	6	5	5	0	0	0	1	5	4	0	0	0	0	4	3	0	0	0	0	4	3	14.3	12.3	12.3	81.312	725	725;673	0	23.545	0	0	0	2.1	10.8	11.3	15887000	0	0	0	0	9856200
P07900	P07900	3	2	2	Heat shock protein HSP 90-alpha	HSP90AA1	sp|P07900|HS90A_HUMAN Heat shock protein HSP 90-alpha OS=Homo sapiens OX=9606 GN=HSP90AA1 PE=1 SV=5	1	3	2	2	2	2	1	2	1	0	2	2	1	1	1	0	2	2	1	1	1	0	9.2	7	7	84.659	732	732	0	83.552	7	7	2.9	5.1	2.9	0	91616000	36894000	26543000	12299000	10278000	5602600
O14617	O14617	1	1	1	AP-3 complex subunit delta-1	AP3D1	sp|O14617|AP3D1_HUMAN AP-3 complex subunit delta-1 OS=Homo sapiens OX=9606 GN=AP3D1 PE=1 SV=1	1	1	1	1	0	0	0	1	1	1	0	0	0	1	1	1	0	0	0	1	1	1	2.5	2.5	2.5	130.16	1153	1153	0	7.326	0	0	0	2.5	2.5	2.5	15841000	0	0	0	5564500	4511900
P04899;P11488;P63096;P19087;P09471;P08754;A8MTJ3;P38405	P04899	5;2;2;2;2;2;2;2	5;2;2;2;2;2;2;2	3;0;0;0;0;0;0;0	Guanine nucleotide-binding protein G(i) subunit alpha-2	GNAI2	sp|P04899|GNAI2_HUMAN Guanine nucleotide-binding protein G(i) subunit alpha-2 OS=Homo sapiens OX=9606 GN=GNAI2 PE=1 SV=3	8	5	5	3	4	4	2	2	3	0	4	4	2	2	3	0	2	3	1	0	1	0	19.4	19.4	14.9	40.45	355	355;350;354;354;354;354;354;381	0	12.438	14.1	18	7.3	4.5	8.7	0	35577000	8798600	7442400	3522300	7510700	8303300
P52701	P52701	1	1	1	DNA mismatch repair protein Msh6	MSH6	sp|P52701|MSH6_HUMAN DNA mismatch repair protein Msh6 OS=Homo sapiens OX=9606 GN=MSH6 PE=1 SV=2	1	1	1	1	0	0	0	1	1	1	0	0	0	1	1	1	0	0	0	1	1	1	2.1	2.1	2.1	152.78	1360	1360	0	4.4951	0	0	0	2.1	2.1	2.1	15656000	0	0	0	5412900	4583800
Q8WWM7	Q8WWM7	3	3	3	Ataxin-2-like protein	ATXN2L	sp|Q8WWM7|ATX2L_HUMAN Ataxin-2-like protein OS=Homo sapiens OX=9606 GN=ATXN2L PE=1 SV=2	1	3	3	3	0	0	0	1	1	3	0	0	0	1	1	3	0	0	0	1	1	3	5.7	5.7	5.7	113.37	1075	1075	0	10.26	0	0	0	2.1	2.1	5.7	15602000	0	0	0	5539800	2895100
Q6ZUT1	Q6ZUT1	3	3	3	Uncharacterized protein C11orf57	C11orf57	sp|Q6ZUT1|NKAP1_HUMAN Uncharacterized protein NKAPD1 OS=Homo sapiens OX=9606 GN=NKAPD1 PE=1 SV=2	1	3	3	3	0	0	0	1	2	2	0	0	0	1	2	2	0	0	0	1	2	2	12	12	12	34.109	292	292	0	8.1886	0	0	0	2.4	6.8	7.5	15514000	0	0	0	3384300	6104000
Q00325	Q00325	2	2	2	Phosphate carrier protein, mitochondrial	SLC25A3	sp|Q00325|MPCP_HUMAN Phosphate carrier protein, mitochondrial OS=Homo sapiens OX=9606 GN=SLC25A3 PE=1 SV=2	1	2	2	2	1	1	1	1	1	1	1	1	1	1	1	1	1	1	1	1	1	1	4.7	4.7	4.7	40.094	362	362	0	7.4937	3.3	3.3	3.3	4.7	4.7	4.7	27515000	3257600	6275400	2815800	3936100	6297100
Q7KZF4	Q7KZF4	10	10	10	Staphylococcal nuclease domain-containing protein 1	SND1	sp|Q7KZF4|SND1_HUMAN Staphylococcal nuclease domain-containing protein 1 OS=Homo sapiens OX=9606 GN=SND1 PE=1 SV=1	1	10	10	10	2	1	0	3	8	2	2	1	0	3	8	2	2	1	0	3	8	2	15.7	15.7	15.7	102	910	910	0	24.01	4	2.2	0	3.8	13.1	3.1	16084000	1081600	0	0	3189900	9545300
P27708	P27708	7	7	7	CAD protein;Glutamine-dependent carbamoyl-phosphate synthase;Aspartate carbamoyltransferase;Dihydroorotase	CAD	sp|P27708|PYR1_HUMAN CAD protein OS=Homo sapiens OX=9606 GN=CAD PE=1 SV=3	1	7	7	7	6	4	3	2	2	1	6	4	3	2	2	1	6	4	3	2	2	1	4.9	4.9	4.9	242.98	2225	2225	0	23.908	4.3	2.9	2.3	1.7	1.1	1	29719000	9432100	1718500	3660800	6004300	1815300
Q9Y333	Q9Y333	2	2	2	U6 snRNA-associated Sm-like protein LSm2	LSM2	sp|Q9Y333|LSM2_HUMAN U6 snRNA-associated Sm-like protein LSm2 OS=Homo sapiens OX=9606 GN=LSM2 PE=1 SV=1	1	2	2	2	0	0	0	2	1	2	0	0	0	2	1	2	0	0	0	2	1	2	40	40	40	10.834	95	95	0	13.525	0	0	0	40	20	40	14748000	0	0	0	5114400	4626900
Q9NQT5	Q9NQT5	1	1	1	Exosome complex component RRP40	EXOSC3	sp|Q9NQT5|EXOS3_HUMAN Exosome complex component RRP40 OS=Homo sapiens OX=9606 GN=EXOSC3 PE=1 SV=3	1	1	1	1	0	1	0	1	1	1	0	1	0	1	1	1	0	1	0	1	1	1	5.5	5.5	5.5	29.572	275	275	0	6.3869	0	5.5	0	5.5	5.5	5.5	15571000	0	1152500	0	5875000	4071900
Q5RL73	Q5RL73	1	1	1	RNA-binding protein 48	RBM48	sp|Q5RL73|RBM48_HUMAN RNA-binding protein 48 OS=Homo sapiens OX=9606 GN=RBM48 PE=2 SV=1	1	1	1	1	0	0	0	1	1	1	0	0	0	1	1	1	0	0	0	1	1	1	4.6	4.6	4.6	41.808	367	367	0	4.762	0	0	0	4.6	4.6	4.6	14381000	0	0	0	3111800	3891200
P81605	P81605	3	3	3	Dermcidin;Survival-promoting peptide;DCD-1	DCD	sp|P81605|DCD_HUMAN Dermcidin OS=Homo sapiens OX=9606 GN=DCD PE=1 SV=2	1	3	3	3	0	0	0	1	3	2	0	0	0	1	3	2	0	0	0	1	3	2	19.1	19.1	19.1	11.284	110	110	0	7.8803	0	0	0	12.7	19.1	12.7	14346000	0	0	0	1260500	8217700
Q9HAU5	Q9HAU5	2	2	2	Regulator of nonsense transcripts 2	UPF2	sp|Q9HAU5|RENT2_HUMAN Regulator of nonsense transcripts 2 OS=Homo sapiens OX=9606 GN=UPF2 PE=1 SV=1	1	2	2	2	0	0	0	1	1	2	0	0	0	1	1	2	0	0	0	1	1	2	3.9	3.9	3.9	147.81	1272	1272	0	5.0256	0	0	0	2	2	3.9	14147000	0	0	0	2601000	2526800
Q9H7E9	Q9H7E9	2	2	2	UPF0488 protein C8orf33	C8orf33	sp|Q9H7E9|CH033_HUMAN UPF0488 protein C8orf33 OS=Homo sapiens OX=9606 GN=C8orf33 PE=1 SV=1	1	2	2	2	0	0	0	0	2	1	0	0	0	0	2	1	0	0	0	0	2	1	17	17	17	24.992	229	229	0	11.766	0	0	0	0	17	10	14000000	0	0	0	0	6435500
P62308;A8MWD9	P62308;A8MWD9	1;1	1;1	1;1	Small nuclear ribonucleoprotein G;Putative small nuclear ribonucleoprotein G-like protein 15	SNRPG;SNRPGP15	sp|P62308|RUXG_HUMAN Small nuclear ribonucleoprotein G OS=Homo sapiens OX=9606 GN=SNRPG PE=1 SV=1;sp|A8MWD9|RUXGL_HUMAN Putative small nuclear ribonucleoprotein G-like protein 15 OS=Homo sapiens OX=9606 GN=SNRPGP15 PE=5 SV=2	2	1	1	1	0	0	0	1	1	0	0	0	0	1	1	0	0	0	0	1	1	0	17.1	17.1	17.1	8.496	76	76;76	0	14.103	0	0	0	17.1	17.1	0	13964000	0	0	0	5851500	8112700
Q2TBE0	Q2TBE0	4	4	4	CWF19-like protein 2	CWF19L2	sp|Q2TBE0|C19L2_HUMAN CWF19-like protein 2 OS=Homo sapiens OX=9606 GN=CWF19L2 PE=1 SV=4	1	4	4	4	0	0	0	2	2	3	0	0	0	2	2	3	0	0	0	2	2	3	4.6	4.6	4.6	103.79	894	894	0	15.452	0	0	0	3.6	1.8	2.8	13960000	0	0	0	3446800	4886900
Q9BZE4	Q9BZE4	3	3	3	Nucleolar GTP-binding protein 1	GTPBP4	sp|Q9BZE4|NOG1_HUMAN Nucleolar GTP-binding protein 1 OS=Homo sapiens OX=9606 GN=GTPBP4 PE=1 SV=3	1	3	3	3	0	0	0	2	2	1	0	0	0	2	2	1	0	0	0	2	2	1	7.4	7.4	7.4	73.964	634	634	0	8.6054	0	0	0	5.5	4.4	3	13950000	0	0	0	5717700	2865900
Q9BVA1	Q9BVA1	30	3	1	Tubulin beta-2B chain	TUBB2B	sp|Q9BVA1|TBB2B_HUMAN Tubulin beta-2B chain OS=Homo sapiens OX=9606 GN=TUBB2B PE=1 SV=1	1	30	3	1	25	19	17	15	20	17	2	1	1	2	1	2	1	1	1	1	0	1	65.2	9	3.6	49.953	445	445	0	36.877	61.1	55.5	51.7	40.7	48.8	48.5	26065000	7753000	1702000	2661500	6055000	1692900
Q14320;Q9Y247	Q14320	6;2	6;2	6;2	Protein FAM50A	FAM50A	sp|Q14320|FA50A_HUMAN Protein FAM50A OS=Homo sapiens OX=9606 GN=FAM50A PE=1 SV=2	2	6	6	6	0	0	0	0	3	6	0	0	0	0	3	6	0	0	0	0	3	6	18.6	18.6	18.6	40.241	339	339;325	0	16.199	0	0	0	0	10.9	18.6	13942000	0	0	0	0	7215500
P57740	P57740	2	2	2	Nuclear pore complex protein Nup107	NUP107	sp|P57740|NU107_HUMAN Nuclear pore complex protein Nup107 OS=Homo sapiens OX=9606 GN=NUP107 PE=1 SV=1	1	2	2	2	0	0	0	2	1	1	0	0	0	2	1	1	0	0	0	2	1	1	3.4	3.4	3.4	106.37	925	925	0	5.4081	0	0	0	3.4	1.8	1.8	13873000	0	0	0	5870600	3340600
P61513	P61513	1	1	1	60S ribosomal protein L37a	RPL37A	sp|P61513|RL37A_HUMAN 60S ribosomal protein L37a OS=Homo sapiens OX=9606 GN=RPL37A PE=1 SV=2	1	1	1	1	0	0	1	1	1	1	0	0	1	1	1	1	0	0	1	1	1	1	19.6	19.6	19.6	10.275	92	92	0	24.579	0	0	19.6	19.6	19.6	19.6	15734000	0	0	1884900	3165400	6872200
P46781	P46781	5	5	5	40S ribosomal protein S9	RPS9	sp|P46781|RS9_HUMAN 40S ribosomal protein S9 OS=Homo sapiens OX=9606 GN=RPS9 PE=1 SV=3	1	5	5	5	0	0	0	1	5	1	0	0	0	1	5	1	0	0	0	1	5	1	23.7	23.7	23.7	22.591	194	194	0	8.337	0	0	0	4.6	23.7	5.7	13833000	0	0	0	1779200	10325000
Q13347	Q13347	3	3	3	Eukaryotic translation initiation factor 3 subunit I	EIF3I	sp|Q13347|EIF3I_HUMAN Eukaryotic translation initiation factor 3 subunit I OS=Homo sapiens OX=9606 GN=EIF3I PE=1 SV=1	1	3	3	3	1	0	0	1	3	1	1	0	0	1	3	1	1	0	0	1	3	1	21.8	21.8	21.8	36.501	325	325	0	10.445	2.8	0	0	8.6	21.8	8.6	13778000	0	0	0	1850400	10168000
Q96EY4	Q96EY4	3	3	3	Translation machinery-associated protein 16	TMA16	sp|Q96EY4|TMA16_HUMAN Translation machinery-associated protein 16 OS=Homo sapiens OX=9606 GN=TMA16 PE=1 SV=2	1	3	3	3	0	0	0	2	2	3	0	0	0	2	2	3	0	0	0	2	2	3	21.7	21.7	21.7	23.864	203	203	0	6.7187	0	0	0	15.8	15.8	21.7	13686000	0	0	0	2728900	3962100
Q9BWG6	Q9BWG6	4	4	4	Sodium channel modifier 1	SCNM1	sp|Q9BWG6|SCNM1_HUMAN Sodium channel modifier 1 OS=Homo sapiens OX=9606 GN=SCNM1 PE=1 SV=1	1	4	4	4	0	0	0	3	2	2	0	0	0	3	2	2	0	0	0	3	2	2	22.2	22.2	22.2	25.949	230	230	0	9.055	0	0	0	17	9.1	7.8	13685000	0	0	0	4290100	3496200
Q9Y6A4	Q9Y6A4	2	2	2	Cilia- and flagella-associated protein 20	CFAP20	sp|Q9Y6A4|CFA20_HUMAN Cilia- and flagella-associated protein 20 OS=Homo sapiens OX=9606 GN=CFAP20 PE=1 SV=1	1	2	2	2	0	0	0	0	2	1	0	0	0	0	2	1	0	0	0	0	2	1	10.4	10.4	10.4	22.774	193	193	0	3.8582	0	0	0	0	10.4	4.1	13679000	0	0	0	0	9621000
Q15773	Q15773	2	2	2	Myeloid leukemia factor 2	MLF2	sp|Q15773|MLF2_HUMAN Myeloid leukemia factor 2 OS=Homo sapiens OX=9606 GN=MLF2 PE=1 SV=1	1	2	2	2	0	0	0	2	1	2	0	0	0	2	1	2	0	0	0	2	1	2	15.7	15.7	15.7	28.147	248	248	0	7.5463	0	0	0	15.7	4.8	15.7	13359000	0	0	0	4976000	2794800
Q9Y4Z0	Q9Y4Z0	3	3	3	U6 snRNA-associated Sm-like protein LSm4	LSM4	sp|Q9Y4Z0|LSM4_HUMAN U6 snRNA-associated Sm-like protein LSm4 OS=Homo sapiens OX=9606 GN=LSM4 PE=1 SV=1	1	3	3	3	0	0	0	2	1	3	0	0	0	2	1	3	0	0	0	2	1	3	36.7	36.7	36.7	15.35	139	139	0	8.1554	0	0	0	21.6	11.5	36.7	13268000	0	0	0	2694800	1681700
Q9NQ55	Q9NQ55	1	1	1	Suppressor of SWI4 1 homolog	PPAN	sp|Q9NQ55|SSF1_HUMAN Suppressor of SWI4 1 homolog OS=Homo sapiens OX=9606 GN=PPAN PE=2 SV=1	1	1	1	1	0	0	0	1	1	1	0	0	0	1	1	1	0	0	0	1	1	1	7.8	7.8	7.8	53.193	473	473	0	5.7066	0	0	0	7.8	7.8	7.8	13234000	0	0	0	3379300	5194500
O60563	O60563	4	4	4	Cyclin-T1	CCNT1	sp|O60563|CCNT1_HUMAN Cyclin-T1 OS=Homo sapiens OX=9606 GN=CCNT1 PE=1 SV=1	1	4	4	4	0	0	0	2	2	3	0	0	0	2	2	3	0	0	0	2	2	3	9.9	9.9	9.9	80.684	726	726	0	9.4246	0	0	0	7.6	7.6	9.4	13017000	0	0	0	3583400	4850200
Q9NPA8	Q9NPA8	3	3	3	Transcription and mRNA export factor ENY2	ENY2	sp|Q9NPA8|ENY2_HUMAN Transcription and mRNA export factor ENY2 OS=Homo sapiens OX=9606 GN=ENY2 PE=1 SV=1	1	3	3	3	0	0	0	1	1	3	0	0	0	1	1	3	0	0	0	1	1	3	41.6	41.6	41.6	11.528	101	101	0	12.063	0	0	0	16.8	16.8	41.6	12991000	0	0	0	1507100	1854500
P68400;Q8NEV1	P68400;Q8NEV1	4;3	4;3	4;3	Casein kinase II subunit alpha;Casein kinase II subunit alpha 3	CSNK2A1;CSNK2A3	sp|P68400|CSK21_HUMAN Casein kinase II subunit alpha OS=Homo sapiens OX=9606 GN=CSNK2A1 PE=1 SV=1;sp|Q8NEV1|CSK23_HUMAN Casein kinase II subunit alpha 3 OS=Homo sapiens OX=9606 GN=CSNK2A3 PE=1 SV=2	2	4	4	4	0	0	0	0	4	1	0	0	0	0	4	1	0	0	0	0	4	1	19.2	19.2	19.2	45.143	391	391;391	0	18.305	0	0	0	0	19.2	4.9	12769000	0	0	0	0	10866000
P61289	P61289	2	2	2	Proteasome activator complex subunit 3	PSME3	sp|P61289|PSME3_HUMAN Proteasome activator complex subunit 3 OS=Homo sapiens OX=9606 GN=PSME3 PE=1 SV=1	1	2	2	2	0	0	0	2	2	2	0	0	0	2	2	2	0	0	0	2	2	2	10.2	10.2	10.2	29.506	254	254	0	12.485	0	0	0	10.2	10.2	10.2	12676000	0	0	0	4124800	4704400
Q04637	Q04637	3	3	3	Eukaryotic translation initiation factor 4 gamma 1	EIF4G1	sp|Q04637|IF4G1_HUMAN Eukaryotic translation initiation factor 4 gamma 1 OS=Homo sapiens OX=9606 GN=EIF4G1 PE=1 SV=4	1	3	3	3	0	0	0	1	1	2	0	0	0	1	1	2	0	0	0	1	1	2	3.3	3.3	3.3	175.49	1599	1599	0	8.5553	0	0	0	1.1	1.1	2.2	12658000	0	0	0	2311100	3099200
A7MBM2	A7MBM2	1	1	1	Protein dispatched homolog 2	DISP2	sp|A7MBM2|DISP2_HUMAN Protein dispatched homolog 2 OS=Homo sapiens OX=9606 GN=DISP2 PE=2 SV=2	1	1	1	1	0	0	0	1	1	0	0	0	0	1	1	0	0	0	0	1	1	0	0.9	0.9	0.9	152	1401	1401	0.0012407	2.7099	0	0	0	0.9	0.9	0	12303000	0	0	0	5585300	6717400
O75534	O75534	3	3	3	Cold shock domain-containing protein E1	CSDE1	sp|O75534|CSDE1_HUMAN Cold shock domain-containing protein E1 OS=Homo sapiens OX=9606 GN=CSDE1 PE=1 SV=2	1	3	3	3	0	0	0	3	3	2	0	0	0	3	3	2	0	0	0	3	3	2	4.5	4.5	4.5	88.884	798	798	0	11.019	0	0	0	4.5	4.5	2.9	12210000	0	0	0	7724700	2543300
Q9P021	Q9P021	2	2	2	Cysteine-rich PDZ-binding protein	CRIPT	sp|Q9P021|CRIPT_HUMAN Cysteine-rich PDZ-binding protein OS=Homo sapiens OX=9606 GN=CRIPT PE=1 SV=1	1	2	2	2	0	0	0	2	0	2	0	0	0	2	0	2	0	0	0	2	0	2	15.8	15.8	15.8	11.216	101	101	0	5.7834	0	0	0	15.8	0	15.8	12194000	0	0	0	4467000	0
Q96T88	Q96T88	1	1	1	E3 ubiquitin-protein ligase UHRF1	UHRF1	sp|Q96T88|UHRF1_HUMAN E3 ubiquitin-protein ligase UHRF1 OS=Homo sapiens OX=9606 GN=UHRF1 PE=1 SV=1	1	1	1	1	0	0	0	1	1	0	0	0	0	1	1	0	0	0	0	1	1	0	2.8	2.8	2.8	89.813	793	793	0	3.4285	0	0	0	2.8	2.8	0	12073000	0	0	0	6635400	5437400
Q9Y2X3	Q9Y2X3	2	2	2	Nucleolar protein 58	NOP58	sp|Q9Y2X3|NOP58_HUMAN Nucleolar protein 58 OS=Homo sapiens OX=9606 GN=NOP58 PE=1 SV=1	1	2	2	2	1	1	0	1	2	1	1	1	0	1	2	1	1	1	0	1	2	1	5.3	5.3	5.3	59.578	529	529	0	11.444	2.8	2.8	0	2.8	5.3	2.8	12558000	504610	0	0	0	6979900
Q9Y5J9	Q9Y5J9	2	2	2	Mitochondrial import inner membrane translocase subunit Tim8 B	TIMM8B	sp|Q9Y5J9|TIM8B_HUMAN Mitochondrial import inner membrane translocase subunit Tim8 B OS=Homo sapiens OX=9606 GN=TIMM8B PE=1 SV=1	1	2	2	2	0	0	0	2	2	1	0	0	0	2	2	1	0	0	0	2	2	1	25.3	25.3	25.3	9.3435	83	83	0	8.1915	0	0	0	25.3	25.3	25.3	11999000	0	0	0	5583600	3991000
Q15427	Q15427	2	2	2	Splicing factor 3B subunit 4	SF3B4	sp|Q15427|SF3B4_HUMAN Splicing factor 3B subunit 4 OS=Homo sapiens OX=9606 GN=SF3B4 PE=1 SV=1	1	2	2	2	0	0	0	1	1	2	0	0	0	1	1	2	0	0	0	1	1	2	7.5	7.5	7.5	44.385	424	424	0	4.5687	0	0	0	1.9	1.9	7.5	11995000	0	0	0	1323300	5358700
Q9ULX6	Q9ULX6	4	4	4	A-kinase anchor protein 8-like	AKAP8L	sp|Q9ULX6|AKP8L_HUMAN A-kinase anchor protein 8-like OS=Homo sapiens OX=9606 GN=AKAP8L PE=1 SV=4	1	4	4	4	0	0	0	0	1	4	0	0	0	0	1	4	0	0	0	0	1	4	14.9	14.9	14.9	71.639	646	646	0	6.8373	0	0	0	0	1.5	14.9	11963000	0	0	0	0	2607800
Q13283	Q13283	2	2	2	Ras GTPase-activating protein-binding protein 1	G3BP1	sp|Q13283|G3BP1_HUMAN Ras GTPase-activating protein-binding protein 1 OS=Homo sapiens OX=9606 GN=G3BP1 PE=1 SV=1	1	2	2	2	0	0	0	1	1	2	0	0	0	1	1	2	0	0	0	1	1	2	5.4	5.4	5.4	52.164	466	466	0	4.1637	0	0	0	2.1	2.1	5.4	11954000	0	0	0	3161100	3492300
Q6NWY9	Q6NWY9	1	1	1	Pre-mRNA-processing factor 40 homolog B	PRPF40B	sp|Q6NWY9|PR40B_HUMAN Pre-mRNA-processing factor 40 homolog B OS=Homo sapiens OX=9606 GN=PRPF40B PE=1 SV=1	1	1	1	1	0	0	0	1	1	1	0	0	0	1	1	1	0	0	0	1	1	1	1.1	1.1	1.1	99.357	871	871	0	5.7229	0	0	0	1.1	1.1	1.1	11906000	0	0	0	2716600	3199200
P78332	P78332	4	3	3	RNA-binding protein 6	RBM6	sp|P78332|RBM6_HUMAN RNA-binding protein 6 OS=Homo sapiens OX=9606 GN=RBM6 PE=1 SV=5	1	4	3	3	0	0	0	2	1	2	0	0	0	2	1	1	0	0	0	2	1	1	3.8	3.2	3.2	128.64	1123	1123	0	5.4569	0	0	0	2	1.2	1.9	11440000	0	0	0	1769500	5426500
Q9GZR7	Q9GZR7	1	1	1	ATP-dependent RNA helicase DDX24	DDX24	sp|Q9GZR7|DDX24_HUMAN ATP-dependent RNA helicase DDX24 OS=Homo sapiens OX=9606 GN=DDX24 PE=1 SV=1	1	1	1	1	0	0	0	1	1	1	0	0	0	1	1	1	0	0	0	1	1	1	3.3	3.3	3.3	96.331	859	859	0	8.3287	0	0	0	3.3	3.3	3.3	11432000	0	0	0	4112500	3228800
P84022;O15198;Q99717;Q15797	P84022;O15198	3;2;1;1	1;0;0;0	1;0;0;0	Mothers against decapentaplegic homolog 3;Mothers against decapentaplegic homolog 9	SMAD3;SMAD9	sp|P84022|SMAD3_HUMAN Mothers against decapentaplegic homolog 3 OS=Homo sapiens OX=9606 GN=SMAD3 PE=1 SV=1;sp|O15198|SMAD9_HUMAN Mothers against decapentaplegic homolog 9 OS=Homo sapiens OX=9606 GN=SMAD9 PE=1 SV=1	4	3	1	1	0	0	0	1	3	1	0	0	0	1	1	1	0	0	0	1	1	1	8.7	3.1	3.1	48.08	425	425;467;465;465	0	2.9298	0	0	0	3.1	8.7	3.1	11427000	0	0	0	2805100	2896000
Q9ULX3	Q9ULX3	1	1	1	RNA-binding protein NOB1	NOB1	sp|Q9ULX3|NOB1_HUMAN RNA-binding protein NOB1 OS=Homo sapiens OX=9606 GN=NOB1 PE=1 SV=1	1	1	1	1	0	0	0	1	1	1	0	0	0	1	1	1	0	0	0	1	1	1	6.1	6.1	6.1	46.674	412	412	0	3.5774	0	0	0	6.1	6.1	6.1	11403000	0	0	0	3756200	4640000
O43390;O60506	O43390	3;1	3;1	3;1	Heterogeneous nuclear ribonucleoprotein R	HNRNPR	sp|O43390|HNRPR_HUMAN Heterogeneous nuclear ribonucleoprotein R OS=Homo sapiens OX=9606 GN=HNRNPR PE=1 SV=1	2	3	3	3	0	0	0	0	3	1	0	0	0	0	3	1	0	0	0	0	3	1	6.2	6.2	6.2	70.942	633	633;623	0	7.313	0	0	0	0	6.2	1.9	11235000	0	0	0	0	8828100
Q9H8M2	Q9H8M2	2	2	2	Bromodomain-containing protein 9	BRD9	sp|Q9H8M2|BRD9_HUMAN Bromodomain-containing protein 9 OS=Homo sapiens OX=9606 GN=BRD9 PE=1 SV=2	1	2	2	2	0	0	0	0	1	2	0	0	0	0	1	2	0	0	0	0	1	2	9.5	9.5	9.5	66.999	597	597	0	9.6727	0	0	0	0	4.7	9.5	11059000	0	0	0	0	3772000
P60891;P21108;P11908	P60891;P21108;P11908	3;3;2	3;3;2	3;3;2	Ribose-phosphate pyrophosphokinase 1;Ribose-phosphate pyrophosphokinase 3;Ribose-phosphate pyrophosphokinase 2	PRPS1;PRPS1L1;PRPS2	sp|P60891|PRPS1_HUMAN Ribose-phosphate pyrophosphokinase 1 OS=Homo sapiens OX=9606 GN=PRPS1 PE=1 SV=2;sp|P21108|PRPS3_HUMAN Ribose-phosphate pyrophosphokinase 3 OS=Homo sapiens OX=9606 GN=PRPS1L1 PE=1 SV=2;sp|P11908|PRPS2_HUMAN Ribose-phosphate pyrophospho	3	3	3	3	0	0	0	1	2	2	0	0	0	1	2	2	0	0	0	1	2	2	12.6	12.6	12.6	34.834	318	318;318;318	0	9.3558	0	0	0	3.8	7.2	9.1	10966000	0	0	0	2868900	4658100
P06576	P06576	6	6	6	ATP synthase subunit beta, mitochondrial	ATP5B	sp|P06576|ATPB_HUMAN ATP synthase subunit beta, mitochondrial OS=Homo sapiens OX=9606 GN=ATP5F1B PE=1 SV=3	1	6	6	6	2	1	3	0	4	2	2	1	3	0	4	2	2	1	3	0	4	2	22.1	22.1	22.1	56.559	529	529	0	14.529	10.6	7	14.2	0	11.7	5.7	21283000	3016200	2668000	4682300	0	7402400
P35580	P35580	5	5	4	Myosin-10	MYH10	sp|P35580|MYH10_HUMAN Myosin-10 OS=Homo sapiens OX=9606 GN=MYH10 PE=1 SV=3	1	5	5	4	4	4	2	1	3	0	4	4	2	1	3	0	4	3	1	1	3	0	3.5	3.5	3	229	1976	1976	0	15.866	3	3.5	1.3	0.7	2.3	0	20642000	6274400	2668500	1059500	2484200	8155700
P82930	P82930	2	2	2	28S ribosomal protein S34, mitochondrial	MRPS34	sp|P82930|RT34_HUMAN 28S ribosomal protein S34, mitochondrial OS=Homo sapiens OX=9606 GN=MRPS34 PE=1 SV=2	1	2	2	2	0	0	0	1	2	0	0	0	0	1	2	0	0	0	0	1	2	0	22.9	22.9	22.9	25.65	218	218	0	8.7295	0	0	0	8.7	22.9	0	10496000	0	0	0	1724000	8771500
P62873	P62873	4	4	4	Guanine nucleotide-binding protein G(I)/G(S)/G(T) subunit beta-1	GNB1	sp|P62873|GBB1_HUMAN Guanine nucleotide-binding protein G(I)/G(S)/G(T) subunit beta-1 OS=Homo sapiens OX=9606 GN=GNB1 PE=1 SV=3	1	4	4	4	3	1	1	1	0	1	3	1	1	1	0	1	3	1	1	1	0	1	14.7	14.7	14.7	37.377	340	340	0	13.73	9.4	5.9	5.9	5.9	0	5.3	19990000	5951400	3646300	0	4982400	0
Q5T3I0	Q5T3I0	3	3	3	G patch domain-containing protein 4	GPATCH4	sp|Q5T3I0|GPTC4_HUMAN G patch domain-containing protein 4 OS=Homo sapiens OX=9606 GN=GPATCH4 PE=1 SV=2	1	3	3	3	0	0	0	3	2	2	0	0	0	3	2	2	0	0	0	3	2	2	12.1	12.1	12.1	50.381	446	446	0	9.4455	0	0	0	12.1	5.6	5.6	10269000	0	0	0	3072300	3356700
Q96I76	Q96I76	2	2	2	G patch domain-containing protein 3	GPATCH3	sp|Q96I76|GPTC3_HUMAN G patch domain-containing protein 3 OS=Homo sapiens OX=9606 GN=GPATCH3 PE=1 SV=1	1	2	2	2	0	0	0	2	1	2	0	0	0	2	1	2	0	0	0	2	1	2	6.9	6.9	6.9	59.337	525	525	0	7.169	0	0	0	6.9	2.1	6.9	9954700	0	0	0	2844500	2547200
P11940;Q9H361	P11940	3;1	3;1	3;1	Polyadenylate-binding protein 1	PABPC1	sp|P11940|PABP1_HUMAN Polyadenylate-binding protein 1 OS=Homo sapiens OX=9606 GN=PABPC1 PE=1 SV=2	2	3	3	3	0	0	0	1	0	3	0	0	0	1	0	3	0	0	0	1	0	3	10.7	10.7	10.7	70.67	636	636;631	0	9.0288	0	0	0	4.6	0	10.7	9817900	0	0	0	1742600	0
O43175	O43175	5	5	5	D-3-phosphoglycerate dehydrogenase	PHGDH	sp|O43175|SERA_HUMAN D-3-phosphoglycerate dehydrogenase OS=Homo sapiens OX=9606 GN=PHGDH PE=1 SV=4	1	5	5	5	4	0	2	1	2	1	4	0	2	1	2	1	4	0	2	1	2	1	13.1	13.1	13.1	56.65	533	533	0	11.509	11.1	0	6.6	2.8	4.9	2.8	19874000	7488200	0	2655000	2405600	4728400
P30876	P30876	3	3	3	DNA-directed RNA polymerase II subunit RPB2	POLR2B	sp|P30876|RPB2_HUMAN DNA-directed RNA polymerase II subunit RPB2 OS=Homo sapiens OX=9606 GN=POLR2B PE=1 SV=1	1	3	3	3	0	0	0	2	3	1	0	0	0	2	3	1	0	0	0	2	3	1	4.5	4.5	4.5	133.9	1174	1174	0	8.5587	0	0	0	3.7	4.5	2.1	9715600	0	0	0	1214100	6977500
Q8IX01	Q8IX01	3	3	3	SURP and G-patch domain-containing protein 2	SUGP2	sp|Q8IX01|SUGP2_HUMAN SURP and G-patch domain-containing protein 2 OS=Homo sapiens OX=9606 GN=SUGP2 PE=1 SV=2	1	3	3	3	0	0	0	1	2	2	0	0	0	1	2	2	0	0	0	1	2	2	4.7	4.7	4.7	120.21	1082	1082	0	12.456	0	0	0	2.2	3.5	3.4	9547300	0	0	0	2732100	2358900
Q14839;Q8TDI0	Q14839;Q8TDI0	2;1	2;1	2;1	Chromodomain-helicase-DNA-binding protein 4;Chromodomain-helicase-DNA-binding protein 5	CHD4;CHD5	sp|Q14839|CHD4_HUMAN Chromodomain-helicase-DNA-binding protein 4 OS=Homo sapiens OX=9606 GN=CHD4 PE=1 SV=2;sp|Q8TDI0|CHD5_HUMAN Chromodomain-helicase-DNA-binding protein 5 OS=Homo sapiens OX=9606 GN=CHD5 PE=1 SV=1	2	2	2	2	1	1	0	1	2	1	1	1	0	1	2	1	1	1	0	1	2	1	1.9	1.9	1.9	218	1912	1912;1954	0	6.1262	0.9	0.9	0	0.9	1.9	0.9	10915000	762670	675820	0	1170900	4671800
Q9H7E2	Q9H7E2	2	2	2	Tudor domain-containing protein 3	TDRD3	sp|Q9H7E2|TDRD3_HUMAN Tudor domain-containing protein 3 OS=Homo sapiens OX=9606 GN=TDRD3 PE=1 SV=1	1	2	2	2	0	0	0	1	1	2	0	0	0	1	1	2	0	0	0	1	1	2	4.3	4.3	4.3	73.184	651	651	0	5.574	0	0	0	2.8	1.5	4.3	9442100	0	0	0	1868700	2284000
Q3KQU3	Q3KQU3	1	1	1	MAP7 domain-containing protein 1	MAP7D1	sp|Q3KQU3|MA7D1_HUMAN MAP7 domain-containing protein 1 OS=Homo sapiens OX=9606 GN=MAP7D1 PE=1 SV=1	1	1	1	1	0	0	0	1	1	1	0	0	0	1	1	1	0	0	0	1	1	1	1.7	1.7	1.7	92.819	841	841	0	2.8822	0	0	0	1.7	1.7	1.7	9423100	0	0	0	2638300	3158200
P27816	P27816	4	4	4	Microtubule-associated protein 4	MAP4	sp|P27816|MAP4_HUMAN Microtubule-associated protein 4 OS=Homo sapiens OX=9606 GN=MAP4 PE=1 SV=3	1	4	4	4	0	0	0	3	3	3	0	0	0	3	3	3	0	0	0	3	3	3	4	4	4	121	1152	1152	0	18.825	0	0	0	2.5	3.7	4	9368000	0	0	0	3061100	2651700
Q99700	Q99700	2	2	2	Ataxin-2	ATXN2	sp|Q99700|ATX2_HUMAN Ataxin-2 OS=Homo sapiens OX=9606 GN=ATXN2 PE=1 SV=2	1	2	2	2	0	0	0	2	1	1	0	0	0	2	1	1	0	0	0	2	1	1	2.4	2.4	2.4	140.28	1313	1313	0	6.7163	0	0	0	2.4	1.3	1.3	9339800	0	0	0	2164600	2978100
O15446	O15446	3	3	3	DNA-directed RNA polymerase I subunit RPA34	CD3EAP	sp|O15446|RPA34_HUMAN DNA-directed RNA polymerase I subunit RPA34 OS=Homo sapiens OX=9606 GN=CD3EAP PE=1 SV=1	1	3	3	3	0	0	0	2	0	1	0	0	0	2	0	1	0	0	0	2	0	1	14.7	14.7	14.7	54.985	510	510	0	5.5522	0	0	0	10	0	4.7	9326200	0	0	0	5473500	0
Q9NR56	Q9NR56	1	1	1	Muscleblind-like protein 1	MBNL1	sp|Q9NR56|MBNL1_HUMAN Muscleblind-like protein 1 OS=Homo sapiens OX=9606 GN=MBNL1 PE=1 SV=2	1	1	1	1	0	0	0	1	1	1	0	0	0	1	1	1	0	0	0	1	1	1	2.8	2.8	2.8	41.817	388	388	0	6.6322	0	0	0	2.8	2.8	2.8	9300500	0	0	0	3017700	3439200
P49368	P49368	3	3	3	T-complex protein 1 subunit gamma	CCT3	sp|P49368|TCPG_HUMAN T-complex protein 1 subunit gamma OS=Homo sapiens OX=9606 GN=CCT3 PE=1 SV=4	1	3	3	3	0	0	0	2	2	2	0	0	0	2	2	2	0	0	0	2	2	2	11.2	11.2	11.2	60.533	545	545	0	7.3023	0	0	0	7	6.4	6.4	9213200	0	0	0	2848400	3551000
Q8WXF0	Q8WXF0	7	4	4	Serine/arginine-rich splicing factor 12	SRSF12	sp|Q8WXF0|SRS12_HUMAN Serine/arginine-rich splicing factor 12 OS=Homo sapiens OX=9606 GN=SRSF12 PE=2 SV=1	1	7	4	4	0	0	0	4	7	3	0	0	0	1	4	0	0	0	0	1	4	0	23	18.4	18.4	30.512	261	261	0	15.237	0	0	0	13.8	23	8.8	9150700	0	0	0	0	9150700
Q92974	Q92974	2	2	2	Rho guanine nucleotide exchange factor 2	ARHGEF2	sp|Q92974|ARHG2_HUMAN Rho guanine nucleotide exchange factor 2 OS=Homo sapiens OX=9606 GN=ARHGEF2 PE=1 SV=4	1	2	2	2	0	0	0	1	1	1	0	0	0	1	1	1	0	0	0	1	1	1	5.2	5.2	5.2	111.54	986	986	0	6.509	0	0	0	2	2	3.1	9105200	0	0	0	2024900	3243600
Q86V48	Q86V48	5	5	5	Leucine zipper protein 1	LUZP1	sp|Q86V48|LUZP1_HUMAN Leucine zipper protein 1 OS=Homo sapiens OX=9606 GN=LUZP1 PE=1 SV=2	1	5	5	5	2	4	0	1	3	1	2	4	0	1	3	1	2	4	0	1	3	1	6.3	6.3	6.3	120.27	1076	1076	0	12.735	2.2	5.4	0	1.2	4.3	1.2	15309000	1359600	4944500	0	1716700	4498800
P61586;P08134	P61586;P08134	2;1	2;1	2;1	Transforming protein RhoA;Rho-related GTP-binding protein RhoC	RHOA;RHOC	sp|P61586|RHOA_HUMAN Transforming protein RhoA OS=Homo sapiens OX=9606 GN=RHOA PE=1 SV=1;sp|P08134|RHOC_HUMAN Rho-related GTP-binding protein RhoC OS=Homo sapiens OX=9606 GN=RHOC PE=1 SV=1	2	2	2	2	0	0	0	1	1	2	0	0	0	1	1	2	0	0	0	1	1	2	14	14	14	21.768	193	193;193	0	3.4557	0	0	0	6.2	6.2	14	8931800	0	0	0	1275700	2872000
P63128;P62684	P63128;P62684	22;19	2;2	2;2	Endogenous retrovirus group K member 9 Pol protein;Protease;Reverse transcriptase/ribonuclease H;Endogenous retrovirus group K member 113 Gag polyprotein	ERVK-9;HERVK_113	sp|P63128|POK9_HUMAN Endogenous retrovirus group K member 9 Pol protein OS=Homo sapiens OX=9606 GN=ERVK-9 PE=3 SV=3;sp|P62684|GA113_HUMAN Endogenous retrovirus group K member 113 Gag polyprotein OS=Homo sapiens OX=9606 GN=HERVK_113 PE=1 SV=2	2	22	2	2	0	0	0	12	17	14	0	0	0	1	2	1	0	0	0	1	2	1	24.8	2.7	2.7	123.62	1117	1117;666	0	6.7064	0	0	0	16.9	21.4	19.9	8891200	0	0	0	0	5179000
Q99848	Q99848	4	4	4	Probable rRNA-processing protein EBP2	EBNA1BP2	sp|Q99848|EBP2_HUMAN Probable rRNA-processing protein EBP2 OS=Homo sapiens OX=9606 GN=EBNA1BP2 PE=1 SV=2	1	4	4	4	0	0	0	1	1	3	0	0	0	1	1	3	0	0	0	1	1	3	20.3	20.3	20.3	34.852	306	306	0	9.832	0	0	0	3.9	3.9	16.3	8847000	0	0	0	2231000	3000900
P62841	P62841	1	1	1	40S ribosomal protein S15	RPS15	sp|P62841|RS15_HUMAN 40S ribosomal protein S15 OS=Homo sapiens OX=9606 GN=RPS15 PE=1 SV=2	1	1	1	1	1	1	0	1	1	0	1	1	0	1	1	0	1	1	0	1	1	0	18.6	18.6	18.6	17.04	145	145	0	15.521	18.6	18.6	0	18.6	18.6	0	16541000	6255700	1495100	0	4041000	4749600
Q92598;O95757;P34932	Q92598	4;1;1	4;1;1	4;1;1	Heat shock protein 105 kDa	HSPH1	sp|Q92598|HS105_HUMAN Heat shock protein 105 kDa OS=Homo sapiens OX=9606 GN=HSPH1 PE=1 SV=1	3	4	4	4	0	0	0	2	2	2	0	0	0	2	2	2	0	0	0	2	2	2	9.2	9.2	9.2	96.864	858	858;839;840	0	23.153	0	0	0	5	4.2	5	8632600	0	0	0	2204000	3372000
P50402	P50402	3	3	3	Emerin	EMD	sp|P50402|EMD_HUMAN Emerin OS=Homo sapiens OX=9606 GN=EMD PE=1 SV=1	1	3	3	3	1	0	0	1	2	2	1	0	0	1	2	2	1	0	0	1	2	2	15.7	15.7	15.7	28.994	254	254	0	13.762	4.7	0	0	5.9	10.6	11	9262400	662400	0	0	0	5242700
O00165	O00165	2	2	2	HCLS1-associated protein X-1	HAX1	sp|O00165|HAX1_HUMAN HCLS1-associated protein X-1 OS=Homo sapiens OX=9606 GN=HAX1 PE=1 SV=2	1	2	2	2	1	1	0	1	2	1	1	1	0	1	2	1	1	1	0	1	2	1	12.2	12.2	12.2	31.62	279	279	0	6.8963	9	9	0	3.2	12.2	3.2	9968400	731140	663190	0	1515900	5567200
P01116;P01112;P01111	P01116;P01112;P01111	3;2;2	3;2;2	3;2;2	GTPase KRas;GTPase KRas, N-terminally processed;GTPase HRas;GTPase HRas, N-terminally processed;GTPase NRas	KRAS;HRAS;NRAS	sp|P01116|RASK_HUMAN GTPase KRas OS=Homo sapiens OX=9606 GN=KRAS PE=1 SV=1;sp|P01112|RASH_HUMAN GTPase HRas OS=Homo sapiens OX=9606 GN=HRAS PE=1 SV=1;sp|P01111|RASN_HUMAN GTPase NRas OS=Homo sapiens OX=9606 GN=NRAS PE=1 SV=1	3	3	3	3	1	0	0	2	1	1	1	0	0	2	1	1	1	0	0	2	1	1	20.1	20.1	20.1	21.656	189	189;189;189	0	4.9834	5.8	0	0	14.3	6.3	6.3	8490400	0	0	0	3629200	3093500
P19784	P19784	2	2	2	Casein kinase II subunit alpha	CSNK2A2	sp|P19784|CSK22_HUMAN Casein kinase II subunit alpha OS=Homo sapiens OX=9606 GN=CSNK2A2 PE=1 SV=1	1	2	2	2	0	0	0	1	1	1	0	0	0	1	1	1	0	0	0	1	1	1	8	8	8	41.213	350	350	0	5.7732	0	0	0	5.4	5.4	2.6	8463200	0	0	0	1441600	4010200
Q96EV2	Q96EV2	1	1	1	RNA-binding protein 33	RBM33	sp|Q96EV2|RBM33_HUMAN RNA-binding protein 33 OS=Homo sapiens OX=9606 GN=RBM33 PE=1 SV=3	1	1	1	1	0	0	0	1	1	1	0	0	0	1	1	1	0	0	0	1	1	1	1.6	1.6	1.6	129.98	1170	1170	0	3.1101	0	0	0	1.6	1.6	1.6	8409600	0	0	0	1824600	4238400
P40227	P40227	1	1	1	T-complex protein 1 subunit zeta	CCT6A	sp|P40227|TCPZ_HUMAN T-complex protein 1 subunit zeta OS=Homo sapiens OX=9606 GN=CCT6A PE=1 SV=3	1	1	1	1	0	1	0	1	1	0	0	1	0	1	1	0	0	1	0	1	1	0	4	4	4	58.024	531	531	0	14.069	0	4	0	4	4	0	12662000	0	4359700	0	4201200	4100800
O75821	O75821	2	2	2	Eukaryotic translation initiation factor 3 subunit G	EIF3G	sp|O75821|EIF3G_HUMAN Eukaryotic translation initiation factor 3 subunit G OS=Homo sapiens OX=9606 GN=EIF3G PE=1 SV=2	1	2	2	2	0	0	0	1	0	1	0	0	0	1	0	1	0	0	0	1	0	1	20	20	20	35.611	320	320	0	6.6602	0	0	0	9.7	0	10.3	8299700	0	0	0	6135700	0
O75330	O75330	2	2	2	Hyaluronan mediated motility receptor	HMMR	sp|O75330|HMMR_HUMAN Hyaluronan mediated motility receptor OS=Homo sapiens OX=9606 GN=HMMR PE=1 SV=2	1	2	2	2	0	0	0	1	1	2	0	0	0	1	1	2	0	0	0	1	1	2	4.1	4.1	4.1	84.099	724	724	0	5.8164	0	0	0	1.8	1.8	4.1	8135100	0	0	0	0	1763100
P19474	P19474	20	20	20	E3 ubiquitin-protein ligase TRIM21	TRIM21	sp|P19474|RO52_HUMAN E3 ubiquitin-protein ligase TRIM21 OS=Homo sapiens OX=9606 GN=TRIM21 PE=1 SV=1	1	20	20	20	16	15	12	0	1	1	16	15	12	0	1	1	16	15	12	0	1	1	40.8	40.8	40.8	54.169	475	475	0	232.91	36.6	37.9	36.4	0	5.1	5.1	366010000	156090000	97736000	104110000	0	3805800
Q9Y3D9	Q9Y3D9	2	2	2	28S ribosomal protein S23, mitochondrial	MRPS23	sp|Q9Y3D9|RT23_HUMAN 28S ribosomal protein S23, mitochondrial OS=Homo sapiens OX=9606 GN=MRPS23 PE=1 SV=2	1	2	2	2	0	0	0	2	1	1	0	0	0	2	1	1	0	0	0	2	1	1	10.5	10.5	10.5	21.77	190	190	0	5.2939	0	0	0	10.5	5.3	5.3	8065100	0	0	0	4272600	0
Q2VIR3;P41091	Q2VIR3;P41091	3;3	3;3	3;3	Putative eukaryotic translation initiation factor 2 subunit 3-like protein;Eukaryotic translation initiation factor 2 subunit 3	EIF2S3L;EIF2S3	sp|Q2VIR3|IF2GL_HUMAN Eukaryotic translation initiation factor 2 subunit 3B OS=Homo sapiens OX=9606 GN=EIF2S3B PE=2 SV=2;sp|P41091|IF2G_HUMAN Eukaryotic translation initiation factor 2 subunit 3 OS=Homo sapiens OX=9606 GN=EIF2S3 PE=1 SV=3	2	3	3	3	0	0	0	1	2	0	0	0	0	1	2	0	0	0	0	1	2	0	10.2	10.2	10.2	51.228	472	472;472	0	11.279	0	0	0	7.8	5.7	0	8027900	0	0	0	5686600	2341300
Q92576	Q92576	3	3	3	PHD finger protein 3	PHF3	sp|Q92576|PHF3_HUMAN PHD finger protein 3 OS=Homo sapiens OX=9606 GN=PHF3 PE=1 SV=3	1	3	3	3	0	0	0	1	1	2	0	0	0	1	1	2	0	0	0	1	1	2	2.9	2.9	2.9	229.48	2039	2039	0	5.5699	0	0	0	1.2	1.3	1.7	8012800	0	0	0	1662000	2247800
O95218	O95218	1	1	1	Zinc finger Ran-binding domain-containing protein 2	ZRANB2	sp|O95218|ZRAB2_HUMAN Zinc finger Ran-binding domain-containing protein 2 OS=Homo sapiens OX=9606 GN=ZRANB2 PE=1 SV=2	1	1	1	1	0	0	0	1	1	1	0	0	0	1	1	1	0	0	0	1	1	1	3.3	3.3	3.3	37.404	330	330	0	5.8362	0	0	0	3.3	3.3	3.3	7976500	0	0	0	2268600	2587700
Q9UBI6	Q9UBI6	2	2	2	Guanine nucleotide-binding protein G(I)/G(S)/G(O) subunit gamma-12	GNG12	sp|Q9UBI6|GBG12_HUMAN Guanine nucleotide-binding protein G(I)/G(S)/G(O) subunit gamma-12 OS=Homo sapiens OX=9606 GN=GNG12 PE=1 SV=3	1	2	2	2	0	1	0	1	1	1	0	1	0	1	1	1	0	1	0	1	1	1	41.7	41.7	41.7	8.0061	72	72	0	5.9266	0	15.3	0	26.4	26.4	26.4	9241800	0	1268600	0	4662600	1874300
Q9Y3D3	Q9Y3D3	2	2	2	28S ribosomal protein S16, mitochondrial	MRPS16	sp|Q9Y3D3|RT16_HUMAN 28S ribosomal protein S16, mitochondrial OS=Homo sapiens OX=9606 GN=MRPS16 PE=1 SV=1	1	2	2	2	0	0	0	2	1	0	0	0	0	2	1	0	0	0	0	2	1	0	29.9	29.9	29.9	15.345	137	137	0	6.1765	0	0	0	29.9	13.1	0	7829600	0	0	0	4880600	2948900
P50991	P50991	2	2	2	T-complex protein 1 subunit delta	CCT4	sp|P50991|TCPD_HUMAN T-complex protein 1 subunit delta OS=Homo sapiens OX=9606 GN=CCT4 PE=1 SV=4	1	2	2	2	1	1	0	1	2	2	1	1	0	1	2	2	1	1	0	1	2	2	5.4	5.4	5.4	57.924	539	539	0	4.4684	2.4	2.4	0	2.4	5.4	5.4	8424600	656710	0	0	1677200	3058500
P05198	P05198	3	3	3	Eukaryotic translation initiation factor 2 subunit 1	EIF2S1	sp|P05198|IF2A_HUMAN Eukaryotic translation initiation factor 2 subunit 1 OS=Homo sapiens OX=9606 GN=EIF2S1 PE=1 SV=3	1	3	3	3	0	0	0	0	2	1	0	0	0	0	2	1	0	0	0	0	2	1	9.5	9.5	9.5	36.112	315	315	0	4.7876	0	0	0	0	5.7	3.8	7752700	0	0	0	0	5341300
P23526	P23526	2	2	2	Adenosylhomocysteinase	AHCY	sp|P23526|SAHH_HUMAN Adenosylhomocysteinase OS=Homo sapiens OX=9606 GN=AHCY PE=1 SV=4	1	2	2	2	0	0	0	1	1	2	0	0	0	1	1	2	0	0	0	1	1	2	4.2	4.2	4.2	47.716	432	432	0	5.8884	0	0	0	4.2	4.2	4.2	7726700	0	0	0	2158600	2318700
P19338	P19338	2	2	2	Nucleolin	NCL	sp|P19338|NUCL_HUMAN Nucleolin OS=Homo sapiens OX=9606 GN=NCL PE=1 SV=3	1	2	2	2	0	0	0	1	1	2	0	0	0	1	1	2	0	0	0	1	1	2	4.2	4.2	4.2	76.613	710	710	0	7.3982	0	0	0	2.8	2.8	4.2	7683100	0	0	0	2156300	3310400
Q9Y399	Q9Y399	1	1	1	28S ribosomal protein S2, mitochondrial	MRPS2	sp|Q9Y399|RT02_HUMAN 28S ribosomal protein S2, mitochondrial OS=Homo sapiens OX=9606 GN=MRPS2 PE=1 SV=1	1	1	1	1	0	0	0	1	0	1	0	0	0	1	0	1	0	0	0	1	0	1	8.1	8.1	8.1	33.249	296	296	0.0024631	2.6303	0	0	0	8.1	0	8.1	7645300	0	0	0	4764400	0
Q8NE71	Q8NE71	2	2	2	ATP-binding cassette sub-family F member 1	ABCF1	sp|Q8NE71|ABCF1_HUMAN ATP-binding cassette sub-family F member 1 OS=Homo sapiens OX=9606 GN=ABCF1 PE=1 SV=2	1	2	2	2	0	0	0	1	1	2	0	0	0	1	1	2	0	0	0	1	1	2	3.9	3.9	3.9	95.925	845	845	0	4.2907	0	0	0	2.7	2.7	3.9	7560000	0	0	0	1430700	2008000
Q8N9M1	Q8N9M1	2	2	2	Uncharacterized protein C19orf47	C19orf47	sp|Q8N9M1|CS047_HUMAN Uncharacterized protein C19orf47 OS=Homo sapiens OX=9606 GN=C19orf47 PE=1 SV=1	1	2	2	2	0	0	0	0	2	1	0	0	0	0	2	1	0	0	0	0	2	1	8.8	8.8	8.8	44.746	422	422	0	3.8119	0	0	0	0	8.8	4.5	7546100	0	0	0	0	5947100
Q5SSJ5	Q5SSJ5	2	2	2	Heterochromatin protein 1-binding protein 3	HP1BP3	sp|Q5SSJ5|HP1B3_HUMAN Heterochromatin protein 1-binding protein 3 OS=Homo sapiens OX=9606 GN=HP1BP3 PE=1 SV=1	1	2	2	2	0	2	1	1	1	1	0	2	1	1	1	1	0	2	1	1	1	1	6.3	6.3	6.3	61.206	553	553	0	12.073	0	6.3	4	2.4	2.4	2.4	9316500	0	1176400	601120	2241200	3289800
Q9UHR5	Q9UHR5	3	3	3	SAP30-binding protein	SAP30BP	sp|Q9UHR5|S30BP_HUMAN SAP30-binding protein OS=Homo sapiens OX=9606 GN=SAP30BP PE=1 SV=1	1	3	3	3	0	0	0	2	1	1	0	0	0	2	1	1	0	0	0	2	1	1	11	11	11	33.87	308	308	0	5.6091	0	0	0	7.5	3.6	4.2	7533100	0	0	0	3446900	917140
Q8N5A5	Q8N5A5	3	3	3	Zinc finger CCCH-type with G patch domain-containing protein	ZGPAT	sp|Q8N5A5|ZGPAT_HUMAN Zinc finger CCCH-type with G patch domain-containing protein OS=Homo sapiens OX=9606 GN=ZGPAT PE=1 SV=3	1	3	3	3	0	0	0	1	1	2	0	0	0	1	1	2	0	0	0	1	1	2	7.3	7.3	7.3	57.358	531	531	0	9.9884	0	0	0	5.1	2.1	7.3	7491600	0	0	0	1762600	2121600
Q13428	Q13428	2	2	2	Treacle protein	TCOF1	sp|Q13428|TCOF_HUMAN Treacle protein OS=Homo sapiens OX=9606 GN=TCOF1 PE=1 SV=3	1	2	2	2	0	0	0	2	2	0	0	0	0	2	2	0	0	0	0	2	2	0	2.5	2.5	2.5	152.1	1488	1488	0	6.4526	0	0	0	2.5	2.5	0	7458900	0	0	0	4256900	3202000
Q6PI47	Q6PI47	2	2	2	BTB/POZ domain-containing protein KCTD18	KCTD18	sp|Q6PI47|KCD18_HUMAN BTB/POZ domain-containing protein KCTD18 OS=Homo sapiens OX=9606 GN=KCTD18 PE=2 SV=2	1	2	2	2	0	0	0	1	1	1	0	0	0	1	1	1	0	0	0	1	1	1	6.6	6.6	6.6	46.739	426	426	0	6.0951	0	0	0	4	2.6	4	7430800	0	0	0	3867500	766760
P62879	P62879	1	1	1	Guanine nucleotide-binding protein G(I)/G(S)/G(T) subunit beta-2	GNB2	sp|P62879|GBB2_HUMAN Guanine nucleotide-binding protein G(I)/G(S)/G(T) subunit beta-2 OS=Homo sapiens OX=9606 GN=GNB2 PE=1 SV=3	1	1	1	1	1	1	1	1	1	1	1	1	1	1	1	1	1	1	1	1	1	1	5.9	5.9	5.9	37.331	340	340	0	4.5652	5.9	5.9	5.9	5.9	5.9	5.9	12925000	2594500	2120700	823150	2041300	2444800
O43719	O43719	2	2	2	HIV Tat-specific factor 1	HTATSF1	sp|O43719|HTSF1_HUMAN HIV Tat-specific factor 1 OS=Homo sapiens OX=9606 GN=HTATSF1 PE=1 SV=1	1	2	2	2	0	0	0	1	0	1	0	0	0	1	0	1	0	0	0	1	0	1	4.4	4.4	4.4	85.852	755	755	0.0072464	2.4264	0	0	0	2	0	2.4	7336400	0	0	0	1148900	0
Q15046	Q15046	1	1	1	Lysine--tRNA ligase	KARS	sp|Q15046|SYK_HUMAN Lysine--tRNA ligase OS=Homo sapiens OX=9606 GN=KARS PE=1 SV=3	1	1	1	1	0	0	0	1	1	1	0	0	0	1	1	1	0	0	0	1	1	1	2.7	2.7	2.7	68.047	597	597	0	10.926	0	0	0	2.7	2.7	2.7	6982200	0	0	0	1912900	2654400
Q15796	Q15796	3	3	1	Mothers against decapentaplegic homolog 2	SMAD2	sp|Q15796|SMAD2_HUMAN Mothers against decapentaplegic homolog 2 OS=Homo sapiens OX=9606 GN=SMAD2 PE=1 SV=1	1	3	3	1	0	0	0	0	3	1	0	0	0	0	3	1	0	0	0	0	1	1	7.9	7.9	2.8	52.306	467	467	0	8.3394	0	0	0	0	7.9	2.8	6919600	0	0	0	0	4800200
P49790	P49790	2	2	2	Nuclear pore complex protein Nup153	NUP153	sp|P49790|NU153_HUMAN Nuclear pore complex protein Nup153 OS=Homo sapiens OX=9606 GN=NUP153 PE=1 SV=2	1	2	2	2	0	0	0	2	1	1	0	0	0	2	1	1	0	0	0	2	1	1	2.6	2.6	2.6	153.94	1475	1475	0	5.8063	0	0	0	2.6	1.6	1	6906900	0	0	0	1860500	1882100
Q9BVP2	Q9BVP2	2	2	2	Guanine nucleotide-binding protein-like 3	GNL3	sp|Q9BVP2|GNL3_HUMAN Guanine nucleotide-binding protein-like 3 OS=Homo sapiens OX=9606 GN=GNL3 PE=1 SV=2	1	2	2	2	0	0	0	0	2	1	0	0	0	0	2	1	0	0	0	0	2	1	5.1	5.1	5.1	61.992	549	549	0	5.935	0	0	0	0	5.1	3.1	6836600	0	0	0	0	3819800
Q9UHB6	Q9UHB6	7	7	7	LIM domain and actin-binding protein 1	LIMA1	sp|Q9UHB6|LIMA1_HUMAN LIM domain and actin-binding protein 1 OS=Homo sapiens OX=9606 GN=LIMA1 PE=1 SV=1	1	7	7	7	4	3	1	0	0	1	4	3	1	0	0	1	4	3	1	0	0	1	14.6	14.6	14.6	85.225	759	759	0	11.961	6.9	6.5	2	0	0	3.3	15967000	4633300	3708500	836510	0	0
Q9Y4P3	Q9Y4P3	1	1	1	Transducin beta-like protein 2	TBL2	sp|Q9Y4P3|TBL2_HUMAN Transducin beta-like protein 2 OS=Homo sapiens OX=9606 GN=TBL2 PE=1 SV=1	1	1	1	1	0	0	0	1	1	1	0	0	0	1	1	1	0	0	0	1	1	1	2.9	2.9	2.9	49.797	447	447	0	3.1823	0	0	0	2.9	2.9	2.9	6785000	0	0	0	1896100	2241800
Q9GZU8	Q9GZU8	3	3	3	Protein FAM192A	FAM192A	sp|Q9GZU8|PIP30_HUMAN PSME3-interacting protein OS=Homo sapiens OX=9606 GN=FAM192A PE=1 SV=1	1	3	3	3	0	0	0	0	1	3	0	0	0	0	1	3	0	0	0	0	1	3	9.1	9.1	9.1	28.912	254	254	0	7.3056	0	0	0	0	4.7	9.1	6595000	0	0	0	0	767230
P51116	P51116	2	1	1	Fragile X mental retardation syndrome-related protein 2	FXR2	sp|P51116|FXR2_HUMAN Fragile X mental retardation syndrome-related protein 2 OS=Homo sapiens OX=9606 GN=FXR2 PE=1 SV=2	1	2	1	1	0	0	0	2	2	2	0	0	0	1	1	1	0	0	0	1	1	1	3.3	2.1	2.1	74.222	673	673	0	13.587	0	0	0	3.3	3.3	3.3	6566200	0	0	0	1778500	2446100
P07814	P07814	3	3	3	Bifunctional glutamate/proline--tRNA ligase;Glutamate--tRNA ligase;Proline--tRNA ligase	EPRS	sp|P07814|SYEP_HUMAN Bifunctional glutamate/proline--tRNA ligase OS=Homo sapiens OX=9606 GN=EPRS PE=1 SV=5	1	3	3	3	1	1	0	0	1	1	1	1	0	0	1	1	1	1	0	0	1	1	2.5	2.5	2.5	170.59	1512	1512	0	6.4259	1.1	0.9	0	0	0.5	1.1	7472700	531060	485010	0	0	0
O60841	O60841	1	1	1	Eukaryotic translation initiation factor 5B	EIF5B	sp|O60841|IF2P_HUMAN Eukaryotic translation initiation factor 5B OS=Homo sapiens OX=9606 GN=EIF5B PE=1 SV=4	1	1	1	1	0	0	1	1	1	0	0	0	1	1	1	0	0	0	1	1	1	0	1.4	1.4	1.4	138.83	1220	1220	0	5.128	0	0	1.4	1.4	1.4	0	6657800	0	0	411410	2668300	3578100
P20042	P20042	4	4	4	Eukaryotic translation initiation factor 2 subunit 2	EIF2S2	sp|P20042|IF2B_HUMAN Eukaryotic translation initiation factor 2 subunit 2 OS=Homo sapiens OX=9606 GN=EIF2S2 PE=1 SV=2	1	4	4	4	1	0	0	0	1	3	1	0	0	0	1	3	1	0	0	0	1	3	18.3	18.3	18.3	38.388	333	333	0	48.592	7.5	0	0	0	3.6	10.8	13034000	6807200	0	0	0	2064100
Q14241	Q14241	4	4	4	Transcription elongation factor B polypeptide 3	TCEB3	sp|Q14241|ELOA1_HUMAN Elongin-A OS=Homo sapiens OX=9606 GN=ELOA PE=1 SV=2	1	4	4	4	0	0	0	1	2	2	0	0	0	1	2	2	0	0	0	1	2	2	9.5	9.5	9.5	89.908	798	798	0	9.4097	0	0	0	2.9	4.3	4.4	6132400	0	0	0	0	3242600
P31689	P31689	2	2	2	DnaJ homolog subfamily A member 1	DNAJA1	sp|P31689|DNJA1_HUMAN DnaJ homolog subfamily A member 1 OS=Homo sapiens OX=9606 GN=DNAJA1 PE=1 SV=2	1	2	2	2	0	0	0	1	1	1	0	0	0	1	1	1	0	0	0	1	1	1	6	6	6	44.868	397	397	0	5.1169	0	0	0	3.3	2.8	3.3	6094500	0	0	0	1135500	3794500
P56385	P56385	2	2	2	ATP synthase subunit e, mitochondrial	ATP5I	sp|P56385|ATP5I_HUMAN ATP synthase subunit e, mitochondrial OS=Homo sapiens OX=9606 GN=ATP5ME PE=1 SV=2	1	2	2	2	0	0	0	0	1	1	0	0	0	0	1	1	0	0	0	0	1	1	18.8	18.8	18.8	7.9331	69	69	0	3.6234	0	0	0	0	14.5	18.8	6080400	0	0	0	0	2634600
O60832	O60832	2	2	2	H/ACA ribonucleoprotein complex subunit 4	DKC1	sp|O60832|DKC1_HUMAN H/ACA ribonucleoprotein complex subunit DKC1 OS=Homo sapiens OX=9606 GN=DKC1 PE=1 SV=3	1	2	2	2	0	0	0	2	1	0	0	0	0	2	1	0	0	0	0	2	1	0	4.7	4.7	4.7	57.673	514	514	0	3.1954	0	0	0	4.7	4.5	0	6027400	0	0	0	3574500	2452900
Q01780	Q01780	3	3	3	Exosome component 10	EXOSC10	sp|Q01780|EXOSX_HUMAN Exosome component 10 OS=Homo sapiens OX=9606 GN=EXOSC10 PE=1 SV=2	1	3	3	3	0	0	0	1	2	1	0	0	0	1	2	1	0	0	0	1	2	1	6.8	6.8	6.8	100.83	885	885	0	8.4943	0	0	0	3.1	4.9	1.9	6008300	0	0	0	1572100	3248300
P62269	P62269	2	2	2	40S ribosomal protein S18	RPS18	sp|P62269|RS18_HUMAN 40S ribosomal protein S18 OS=Homo sapiens OX=9606 GN=RPS18 PE=1 SV=3	1	2	2	2	1	0	0	1	1	1	1	0	0	1	1	1	1	0	0	1	1	1	14.5	14.5	14.5	17.718	152	152	0	4.8399	5.9	0	0	8.6	8.6	8.6	5955300	0	0	0	2031000	2185900
Q9ULV4	Q9ULV4	1	1	1	Coronin-1C	CORO1C	sp|Q9ULV4|COR1C_HUMAN Coronin-1C OS=Homo sapiens OX=9606 GN=CORO1C PE=1 SV=1	1	1	1	1	1	1	1	1	1	1	1	1	1	1	1	1	1	1	1	1	1	1	3.4	3.4	3.4	53.248	474	474	0	8.7734	3.4	3.4	3.4	3.4	3.4	3.4	11759000	1944000	2448600	1415200	1456100	3194900
Q14684	Q14684	3	3	3	Ribosomal RNA processing protein 1 homolog B	RRP1B	sp|Q14684|RRP1B_HUMAN Ribosomal RNA processing protein 1 homolog B OS=Homo sapiens OX=9606 GN=RRP1B PE=1 SV=3	1	3	3	3	0	0	0	2	1	0	0	0	0	2	1	0	0	0	0	2	1	0	6.7	6.7	6.7	84.427	758	758	0	8.3129	0	0	0	4.1	2.6	0	5942500	0	0	0	3451400	2491200
P11233;P11234	P11233	3;1	3;1	3;1	Ras-related protein Ral-A	RALA	sp|P11233|RALA_HUMAN Ras-related protein Ral-A OS=Homo sapiens OX=9606 GN=RALA PE=1 SV=1	2	3	3	3	0	0	0	1	2	1	0	0	0	1	2	1	0	0	0	1	2	1	13.6	13.6	13.6	23.567	206	206;206	0	6.3975	0	0	0	5.8	7.8	5.8	5916400	0	0	0	1717000	1928900
P62306	P62306	1	1	1	Small nuclear ribonucleoprotein F	SNRPF	sp|P62306|RUXF_HUMAN Small nuclear ribonucleoprotein F OS=Homo sapiens OX=9606 GN=SNRPF PE=1 SV=1	1	1	1	1	0	0	0	1	1	0	0	0	0	1	1	0	0	0	0	1	1	0	24.4	24.4	24.4	9.7251	86	86	0	3.9922	0	0	0	24.4	24.4	0	5857200	0	0	0	3628100	2229100
Q14004	Q14004	4	2	2	Cyclin-dependent kinase 13	CDK13	sp|Q14004|CDK13_HUMAN Cyclin-dependent kinase 13 OS=Homo sapiens OX=9606 GN=CDK13 PE=1 SV=2	1	4	2	2	0	0	0	1	3	4	0	0	0	0	1	2	0	0	0	0	1	2	4	2.1	2.1	164.92	1512	1512	0	5.6597	0	0	0	0.5	2.7	4	5844900	0	0	0	0	1341800
P42166	P42166	2	2	2	Lamina-associated polypeptide 2, isoform alpha;Thymopoietin;Thymopentin	TMPO	sp|P42166|LAP2A_HUMAN Lamina-associated polypeptide 2, isoform alpha OS=Homo sapiens OX=9606 GN=TMPO PE=1 SV=2	1	2	2	2	0	0	0	1	1	1	0	0	0	1	1	1	0	0	0	1	1	1	3.9	3.9	3.9	75.491	694	694	0	6.9454	0	0	0	1.9	1.9	2	5824700	0	0	0	1256600	2928800
P62826	P62826	3	3	3	GTP-binding nuclear protein Ran	RAN	sp|P62826|RAN_HUMAN GTP-binding nuclear protein Ran OS=Homo sapiens OX=9606 GN=RAN PE=1 SV=3	1	3	3	3	2	2	1	1	1	1	2	2	1	1	1	1	2	2	1	1	1	1	22.7	22.7	22.7	24.423	216	216	0	12.252	18.1	9.7	5.1	5.1	5.1	5.1	14077000	7453500	0	799170	1693200	2851000
Q8IY81	Q8IY81	2	2	2	pre-rRNA processing protein FTSJ3	FTSJ3	sp|Q8IY81|SPB1_HUMAN pre-rRNA processing protein FTSJ3 OS=Homo sapiens OX=9606 GN=FTSJ3 PE=1 SV=2	1	2	2	2	0	0	0	1	2	1	0	0	0	1	2	1	0	0	0	1	2	1	3	3	3	96.557	847	847	0	4.5207	0	0	0	2	3	2	5739400	0	0	0	1634400	2945500
Q01860	Q01860	1	1	1	POU domain, class 5, transcription factor 1	POU5F1	sp|Q01860|PO5F1_HUMAN POU domain, class 5, transcription factor 1 OS=Homo sapiens OX=9606 GN=POU5F1 PE=1 SV=1	1	1	1	1	0	0	0	1	0	1	0	0	0	1	0	1	0	0	0	1	0	1	8.9	8.9	8.9	38.57	360	360	0	5.1041	0	0	0	8.9	0	8.9	5585000	0	0	0	2861900	0
Q5T8P6	Q5T8P6	3	3	3	RNA-binding protein 26	RBM26	sp|Q5T8P6|RBM26_HUMAN RNA-binding protein 26 OS=Homo sapiens OX=9606 GN=RBM26 PE=1 SV=3	1	3	3	3	0	0	0	0	2	2	0	0	0	0	2	2	0	0	0	0	2	2	4	4	4	113.6	1007	1007	0	4.9541	0	0	0	0	3	2.5	5559400	0	0	0	0	3049900
P48426	P48426	5	3	3	Phosphatidylinositol 5-phosphate 4-kinase type-2 alpha	PIP4K2A	sp|P48426|PI42A_HUMAN Phosphatidylinositol 5-phosphate 4-kinase type-2 alpha OS=Homo sapiens OX=9606 GN=PIP4K2A PE=1 SV=2	1	5	3	3	0	0	0	2	3	5	0	0	0	0	1	3	0	0	0	0	1	3	16	9.4	9.4	46.224	406	406	0	6.1734	0	0	0	6.7	10.1	16	5509400	0	0	0	0	1034400
Q8WW33	Q8WW33	1	1	1	Gametocyte-specific factor 1	GTSF1	sp|Q8WW33|GTSF1_HUMAN Gametocyte-specific factor 1 OS=Homo sapiens OX=9606 GN=GTSF1 PE=1 SV=2	1	1	1	1	0	0	0	1	0	1	0	0	0	1	0	1	0	0	0	1	0	1	15.6	15.6	15.6	19.266	167	167	0	3.0203	0	0	0	15.6	0	15.6	5494900	0	0	0	2896300	0
P82979	P82979	1	1	1	SAP domain-containing ribonucleoprotein	SARNP	sp|P82979|SARNP_HUMAN SAP domain-containing ribonucleoprotein OS=Homo sapiens OX=9606 GN=SARNP PE=1 SV=3	1	1	1	1	0	0	0	1	1	1	0	0	0	1	1	1	0	0	0	1	1	1	4.8	4.8	4.8	23.671	210	210	0.0095465	2.3011	0	0	0	4.8	4.8	4.8	5424300	0	0	0	1717900	1861000
Q93079;Q5QNW6;P23527	Q93079;Q5QNW6;P23527	7;7;7	1;1;1	1;1;1	Histone H2B type 1-H;Histone H2B type 2-F;Histone H2B type 1-O	HIST1H2BH;HIST2H2BF;HIST1H2BO	sp|Q93079|H2B1H_HUMAN Histone H2B type 1-H OS=Homo sapiens OX=9606 GN=HIST1H2BH PE=1 SV=3;sp|Q5QNW6|H2B2F_HUMAN Histone H2B type 2-F OS=Homo sapiens OX=9606 GN=HIST2H2BF PE=1 SV=3;sp|P23527|H2B1O_HUMAN Histone H2B type 1-O OS=Homo sapiens OX=9606 GN=HIST1H	3	7	1	1	3	3	1	3	4	5	0	0	0	1	1	1	0	0	0	1	1	1	50	8.7	8.7	13.892	126	126;126;126	0	3.5911	24.6	24.6	11.9	21.4	34.1	38.1	5390000	0	0	0	2074300	2441500
O14757	O14757	1	1	1	Serine/threonine-protein kinase Chk1	CHEK1	sp|O14757|CHK1_HUMAN Serine/threonine-protein kinase Chk1 OS=Homo sapiens OX=9606 GN=CHEK1 PE=1 SV=2	1	1	1	1	0	0	0	1	1	0	0	0	0	1	1	0	0	0	0	1	1	0	6.3	6.3	6.3	54.433	476	476	0	9.3327	0	0	0	6.3	6.3	0	5367500	0	0	0	3153800	2213700
Q9H875	Q9H875	2	2	2	PRKR-interacting protein 1	PRKRIP1	sp|Q9H875|PKRI1_HUMAN PRKR-interacting protein 1 OS=Homo sapiens OX=9606 GN=PRKRIP1 PE=1 SV=1	1	2	2	2	0	0	0	2	0	1	0	0	0	2	0	1	0	0	0	2	0	1	16.3	16.3	16.3	20.997	184	184	0	6.2913	0	0	0	16.3	0	6.5	5292700	0	0	0	3313000	0
P98179	P98179	1	1	1	RNA-binding protein 3	RBM3	sp|P98179|RBM3_HUMAN RNA-binding protein 3 OS=Homo sapiens OX=9606 GN=RBM3 PE=1 SV=1	1	1	1	1	0	0	0	0	0	1	0	0	0	0	0	1	0	0	0	0	0	1	11.5	11.5	11.5	17.17	157	157	0	4.6801	0	0	0	0	0	11.5	5252000	0	0	0	0	0
P09012	P09012	2	2	2	U1 small nuclear ribonucleoprotein A	SNRPA	sp|P09012|SNRPA_HUMAN U1 small nuclear ribonucleoprotein A OS=Homo sapiens OX=9606 GN=SNRPA PE=1 SV=3	1	2	2	2	0	0	0	0	1	2	0	0	0	0	1	2	0	0	0	0	1	2	10.6	10.6	10.6	31.279	282	282	0	5.2988	0	0	0	0	10.6	10.6	5170700	0	0	0	0	1067700
P07203	P07203	1	1	1	Glutathione peroxidase 1	GPX1	sp|P07203|GPX1_HUMAN Glutathione peroxidase 1 OS=Homo sapiens OX=9606 GN=GPX1 PE=1 SV=4	1	1	1	1	0	0	0	0	1	1	0	0	0	0	1	1	0	0	0	0	1	1	8.9	8.9	8.9	22.088	203	203	0	2.9789	0	0	0	0	8.9	8.9	5163100	0	0	0	0	2335100
Q13885	Q13885	29	1	1	Tubulin beta-2A chain	TUBB2A	sp|Q13885|TBB2A_HUMAN Tubulin beta-2A chain OS=Homo sapiens OX=9606 GN=TUBB2A PE=1 SV=1	1	29	1	1	24	18	16	15	21	16	1	1	1	1	1	0	1	1	1	1	1	0	56.4	3.6	3.6	49.906	445	445	0	9.4501	52.4	46.7	42.9	40.7	52.4	44.9	7609600	2530300	0	0	0	5079300
P20700	P20700	3	3	3	Lamin-B1	LMNB1	sp|P20700|LMNB1_HUMAN Lamin-B1 OS=Homo sapiens OX=9606 GN=LMNB1 PE=1 SV=2	1	3	3	3	0	1	0	1	0	2	0	1	0	1	0	2	0	1	0	1	0	2	7.2	7.2	7.2	66.408	586	586	0	10.957	0	1.5	0	3.6	0	5.6	5451300	0	431700	0	2714500	0
A1L170	A1L170	1	1	1	Uncharacterized protein C1orf226	C1orf226	sp|A1L170|CA226_HUMAN Uncharacterized protein C1orf226 OS=Homo sapiens OX=9606 GN=C1orf226 PE=1 SV=1	1	1	1	1	0	0	0	0	1	1	0	0	0	0	1	1	0	0	0	0	1	1	6.2	6.2	6.2	29.057	272	272	0.0060606	2.4702	0	0	0	0	6.2	6.2	4976100	0	0	0	0	1737700
P53621	P53621	2	2	2	Coatomer subunit alpha;Xenin;Proxenin	COPA	sp|P53621|COPA_HUMAN Coatomer subunit alpha OS=Homo sapiens OX=9606 GN=COPA PE=1 SV=2	1	2	2	2	0	0	0	2	1	0	0	0	0	2	1	0	0	0	0	2	1	0	3.2	3.2	3.2	138.34	1224	1224	0	6.3186	0	0	0	3.2	2	0	4971700	0	0	0	3455500	1516200
Q92785	Q92785	2	2	2	Zinc finger protein ubi-d4	DPF2	sp|Q92785|REQU_HUMAN Zinc finger protein ubi-d4 OS=Homo sapiens OX=9606 GN=DPF2 PE=1 SV=2	1	2	2	2	0	0	0	1	1	1	0	0	0	1	1	1	0	0	0	1	1	1	7.7	7.7	7.7	44.155	391	391	0	4.4951	0	0	0	5.4	2.3	5.4	4877300	0	0	0	2167500	458540
O95816	O95816	1	1	1	BAG family molecular chaperone regulator 2	BAG2	sp|O95816|BAG2_HUMAN BAG family molecular chaperone regulator 2 OS=Homo sapiens OX=9606 GN=BAG2 PE=1 SV=1	1	1	1	1	1	0	0	1	1	1	1	0	0	1	1	1	1	0	0	1	1	1	5.2	5.2	5.2	23.772	211	211	0	3.9963	5.2	0	0	5.2	5.2	5.2	5306000	483570	0	0	1991200	2831200
Q9Y5A9	Q9Y5A9	1	1	1	YTH domain-containing family protein 2	YTHDF2	sp|Q9Y5A9|YTHD2_HUMAN YTH domain-containing family protein 2 OS=Homo sapiens OX=9606 GN=YTHDF2 PE=1 SV=2	1	1	1	1	1	0	0	0	1	0	1	0	0	0	1	0	1	0	0	0	1	0	1.9	1.9	1.9	62.333	579	579	0	3.1157	1.9	0	0	0	1.9	0	5380300	671260	0	0	0	4709000
Q9NVI7	Q9NVI7	2	2	2	ATPase family AAA domain-containing protein 3A	ATAD3A	sp|Q9NVI7|ATD3A_HUMAN ATPase family AAA domain-containing protein 3A OS=Homo sapiens OX=9606 GN=ATAD3A PE=1 SV=2	1	2	2	2	0	0	0	0	0	2	0	0	0	0	0	2	0	0	0	0	0	2	6.2	6.2	6.2	71.368	634	634	0	3.4906	0	0	0	0	0	6.2	4651300	0	0	0	0	0
Q14152	Q14152	2	2	2	Eukaryotic translation initiation factor 3 subunit A	EIF3A	sp|Q14152|EIF3A_HUMAN Eukaryotic translation initiation factor 3 subunit A OS=Homo sapiens OX=9606 GN=EIF3A PE=1 SV=1	1	2	2	2	0	0	0	2	1	1	0	0	0	2	1	1	0	0	0	2	1	1	1.5	1.5	1.5	166.57	1382	1382	0	3.0978	0	0	0	1.5	0.8	0.8	4570200	0	0	0	2523100	843970
Q8N6N3	Q8N6N3	2	2	2	UPF0690 protein C1orf52	C1orf52	sp|Q8N6N3|CA052_HUMAN UPF0690 protein C1orf52 OS=Homo sapiens OX=9606 GN=C1orf52 PE=1 SV=1	1	2	2	2	0	0	0	0	0	2	0	0	0	0	0	2	0	0	0	0	0	2	13.2	13.2	13.2	20.599	182	182	0	5.8677	0	0	0	0	0	13.2	4553000	0	0	0	0	0
Q12905	Q12905	1	1	1	Interleukin enhancer-binding factor 2	ILF2	sp|Q12905|ILF2_HUMAN Interleukin enhancer-binding factor 2 OS=Homo sapiens OX=9606 GN=ILF2 PE=1 SV=2	1	1	1	1	0	0	0	1	1	0	0	0	0	1	1	0	0	0	0	1	1	0	4.4	4.4	4.4	43.062	390	390	0	3.212	0	0	0	4.4	4.4	0	4511100	0	0	0	1986800	2524300
O60783	O60783	1	1	1	28S ribosomal protein S14, mitochondrial	MRPS14	sp|O60783|RT14_HUMAN 28S ribosomal protein S14, mitochondrial OS=Homo sapiens OX=9606 GN=MRPS14 PE=1 SV=1	1	1	1	1	0	0	0	1	1	1	0	0	0	1	1	1	0	0	0	1	1	1	11.7	11.7	11.7	15.139	128	128	0.0012453	2.7961	0	0	0	11.7	11.7	11.7	4485700	0	0	0	1747700	1664600
P49674	P49674	2	2	2	Casein kinase I isoform epsilon	CSNK1E	sp|P49674|KC1E_HUMAN Casein kinase I isoform epsilon OS=Homo sapiens OX=9606 GN=CSNK1E PE=1 SV=1	1	2	2	2	0	0	0	0	1	1	0	0	0	0	1	1	0	0	0	0	1	1	11.5	11.5	11.5	47.315	416	416	0	3.4018	0	0	0	0	3.4	8.2	4482700	0	0	0	0	903870
Q9HCE5	Q9HCE5	1	1	1	N6-adenosine-methyltransferase subunit METTL14	METTL14	sp|Q9HCE5|MET14_HUMAN N6-adenosine-methyltransferase non-catalytic subunit OS=Homo sapiens OX=9606 GN=METTL14 PE=1 SV=2	1	1	1	1	0	0	0	1	0	1	0	0	0	1	0	1	0	0	0	1	0	1	7	7	7	52.15	456	456	0.0024361	2.5111	0	0	0	7	0	7	4479300	0	0	0	1997700	0
Q15560;P23193	Q15560;P23193	1;1	1;1	1;1	Transcription elongation factor A protein 2;Transcription elongation factor A protein 1	TCEA2;TCEA1	sp|Q15560|TCEA2_HUMAN Transcription elongation factor A protein 2 OS=Homo sapiens OX=9606 GN=TCEA2 PE=1 SV=1;sp|P23193|TCEA1_HUMAN Transcription elongation factor A protein 1 OS=Homo sapiens OX=9606 GN=TCEA1 PE=1 SV=2	2	1	1	1	0	0	0	0	1	1	0	0	0	0	1	1	0	0	0	0	1	1	4.3	4.3	4.3	33.6	299	299;301	0.0024691	2.6592	0	0	0	0	4.3	4.3	4472600	0	0	0	0	2009700
P02786	P02786	1	1	1	Transferrin receptor protein 1;Transferrin receptor protein 1, serum form	TFRC	sp|P02786|TFR1_HUMAN Transferrin receptor protein 1 OS=Homo sapiens OX=9606 GN=TFRC PE=1 SV=2	1	1	1	1	0	0	1	1	1	1	0	0	1	1	1	1	0	0	1	1	1	1	2.1	2.1	2.1	84.87	760	760	0.0024661	2.6349	0	0	2.1	2.1	2.1	2.1	4985600	0	0	560080	1174800	1619000
Q1ED39	Q1ED39	2	2	2	Lysine-rich nucleolar protein 1	KNOP1	sp|Q1ED39|KNOP1_HUMAN Lysine-rich nucleolar protein 1 OS=Homo sapiens OX=9606 GN=KNOP1 PE=1 SV=1	1	2	2	2	0	0	0	2	0	0	0	0	0	2	0	0	0	0	0	2	0	0	7.9	7.9	7.9	51.588	458	458	0	4.0977	0	0	0	7.9	0	0	4414400	0	0	0	4414400	0
Q00341	Q00341	1	1	1	Vigilin	HDLBP	sp|Q00341|VIGLN_HUMAN Vigilin OS=Homo sapiens OX=9606 GN=HDLBP PE=1 SV=2	1	1	1	1	0	1	0	1	1	0	0	1	0	1	1	0	0	1	0	1	1	0	1.2	1.2	1.2	141.45	1268	1268	0	3.9304	0	1.2	0	1.2	1.2	0	5404500	0	1014000	0	2057300	2333100
Q9Y2Q9	Q9Y2Q9	3	3	3	28S ribosomal protein S28, mitochondrial	MRPS28	sp|Q9Y2Q9|RT28_HUMAN 28S ribosomal protein S28, mitochondrial OS=Homo sapiens OX=9606 GN=MRPS28 PE=1 SV=1	1	3	3	3	0	0	0	0	1	3	0	0	0	0	1	3	0	0	0	0	1	3	15.5	15.5	15.5	20.843	187	187	0	4.2468	0	0	0	0	5.3	15.5	4369900	0	0	0	0	0
O00567	O00567	1	1	1	Nucleolar protein 56	NOP56	sp|O00567|NOP56_HUMAN Nucleolar protein 56 OS=Homo sapiens OX=9606 GN=NOP56 PE=1 SV=4	1	1	1	1	0	0	0	0	0	1	0	0	0	0	0	1	0	0	0	0	0	1	3.9	3.9	3.9	66.049	594	594	0	3.6151	0	0	0	0	0	3.9	4327300	0	0	0	0	0
P82663	P82663	3	3	3	28S ribosomal protein S25, mitochondrial	MRPS25	sp|P82663|RT25_HUMAN 28S ribosomal protein S25, mitochondrial OS=Homo sapiens OX=9606 GN=MRPS25 PE=1 SV=1	1	3	3	3	0	0	0	1	1	1	0	0	0	1	1	1	0	0	0	1	1	1	24.3	24.3	24.3	20.116	173	173	0	6.8996	0	0	0	14.5	11.6	9.8	4309500	0	0	0	1436100	1497800
P22087	P22087	2	2	2	rRNA 2-O-methyltransferase fibrillarin	FBL	sp|P22087|FBRL_HUMAN rRNA 2-O-methyltransferase fibrillarin OS=Homo sapiens OX=9606 GN=FBL PE=1 SV=2	1	2	2	2	1	0	0	0	1	1	1	0	0	0	1	1	1	0	0	0	1	1	14.3	14.3	14.3	33.784	321	321	0	17.957	10.3	0	0	0	4	4	6523500	2258000	0	0	0	2397200
Q15649	Q15649	2	2	2	Zinc finger HIT domain-containing protein 3	ZNHIT3	sp|Q15649|ZNHI3_HUMAN Zinc finger HIT domain-containing protein 3 OS=Homo sapiens OX=9606 GN=ZNHIT3 PE=1 SV=2	1	2	2	2	0	0	0	0	0	2	0	0	0	0	0	2	0	0	0	0	0	2	14.8	14.8	14.8	17.607	155	155	0	3.6397	0	0	0	0	0	14.8	4173300	0	0	0	0	0
Q05682	Q05682	2	2	2	Caldesmon	CALD1	sp|Q05682|CALD1_HUMAN Caldesmon OS=Homo sapiens OX=9606 GN=CALD1 PE=1 SV=3	1	2	2	2	2	0	0	0	2	1	2	0	0	0	2	1	2	0	0	0	2	1	2	2	2	93.23	793	793	0	6.3126	2	0	0	0	2	2	5752300	1663300	0	0	0	1970600
O43324	O43324	2	2	2	Eukaryotic translation elongation factor 1 epsilon-1	EEF1E1	sp|O43324|MCA3_HUMAN Eukaryotic translation elongation factor 1 epsilon-1 OS=Homo sapiens OX=9606 GN=EEF1E1 PE=1 SV=1	1	2	2	2	1	0	0	1	1	2	1	0	0	1	1	2	1	0	0	1	1	2	12.1	12.1	12.1	19.81	174	174	0	5.5439	6.3	0	0	5.7	5.7	12.1	4845200	815380	0	0	0	793340
Q00610	Q00610	3	3	3	Clathrin heavy chain 1	CLTC	sp|Q00610|CLH1_HUMAN Clathrin heavy chain 1 OS=Homo sapiens OX=9606 GN=CLTC PE=1 SV=5	1	3	3	3	2	1	0	1	2	1	2	1	0	1	2	1	2	1	0	1	2	1	2.4	2.4	2.4	191.61	1675	1675	0	8.2236	1.8	1.1	0	0.7	1.8	0.7	7337500	2674600	651650	0	1045700	2965600
Q9NS56	Q9NS56	2	2	2	E3 ubiquitin-protein ligase Topors	TOPORS	sp|Q9NS56|TOPRS_HUMAN E3 ubiquitin-protein ligase Topors OS=Homo sapiens OX=9606 GN=TOPORS PE=1 SV=1	1	2	2	2	0	0	0	1	1	1	0	0	0	1	1	1	0	0	0	1	1	1	3.2	3.2	3.2	119.2	1045	1045	0	4.5549	0	0	0	1.4	1.7	1.4	3948000	0	0	0	0	0
Q9BSD7	Q9BSD7	1	1	1	Cancer-related nucleoside-triphosphatase	NTPCR	sp|Q9BSD7|NTPCR_HUMAN Cancer-related nucleoside-triphosphatase OS=Homo sapiens OX=9606 GN=NTPCR PE=1 SV=1	1	1	1	1	1	1	0	1	1	0	1	1	0	1	1	0	1	1	0	1	1	0	9.5	9.5	9.5	20.713	190	190	0	3.9134	9.5	9.5	0	9.5	9.5	0	5584700	878700	759050	0	1892000	2055000
P82650	P82650	2	2	2	28S ribosomal protein S22, mitochondrial	MRPS22	sp|P82650|RT22_HUMAN 28S ribosomal protein S22, mitochondrial OS=Homo sapiens OX=9606 GN=MRPS22 PE=1 SV=1	1	2	2	2	0	0	0	2	1	0	0	0	0	2	1	0	0	0	0	2	1	0	7.5	7.5	7.5	41.28	360	360	0	4.673	0	0	0	7.5	3.3	0	3873300	0	0	0	1562900	2310400
P50990	P50990	3	3	3	T-complex protein 1 subunit theta	CCT8	sp|P50990|TCPQ_HUMAN T-complex protein 1 subunit theta OS=Homo sapiens OX=9606 GN=CCT8 PE=1 SV=4	1	3	3	3	0	0	0	0	3	0	0	0	0	0	3	0	0	0	0	0	3	0	8.2	8.2	8.2	59.62	548	548	0	4.9595	0	0	0	0	8.2	0	3862700	0	0	0	0	3862700
P23528;Q9Y281	P23528	6;2	6;2	6;2	Cofilin-1	CFL1	sp|P23528|COF1_HUMAN Cofilin-1 OS=Homo sapiens OX=9606 GN=CFL1 PE=1 SV=3	2	6	6	6	4	3	3	1	1	1	4	3	3	1	1	1	4	3	3	1	1	1	32.5	32.5	32.5	18.502	166	166;166	0	25.298	22.9	31.3	21.1	12	12	12	30700000	21352000	4115000	1518600	1050900	830860
Q99575	Q99575	2	2	2	Ribonucleases P/MRP protein subunit POP1	POP1	sp|Q99575|POP1_HUMAN Ribonucleases P/MRP protein subunit POP1 OS=Homo sapiens OX=9606 GN=POP1 PE=1 SV=2	1	2	2	2	0	0	0	1	2	0	0	0	0	1	2	0	0	0	0	1	2	0	4	4	4	114.71	1024	1024	0	4.8771	0	0	0	2.2	4	0	3665600	0	0	0	1846400	1819100
Q16527	Q16527	3	3	3	Cysteine and glycine-rich protein 2	CSRP2	sp|Q16527|CSRP2_HUMAN Cysteine and glycine-rich protein 2 OS=Homo sapiens OX=9606 GN=CSRP2 PE=1 SV=3	1	3	3	3	3	1	1	1	0	0	3	1	1	1	0	0	3	1	1	1	0	0	25.4	25.4	25.4	20.954	193	193	0	13.37	25.4	7.8	7.8	7.8	0	0	14759000	4460200	3006000	3642500	3650600	0
Q05639	Q05639	12	1	1	Elongation factor 1-alpha 2	EEF1A2	sp|Q05639|EF1A2_HUMAN Elongation factor 1-alpha 2 OS=Homo sapiens OX=9606 GN=EEF1A2 PE=1 SV=1	1	12	1	1	7	4	6	8	8	10	0	0	0	0	0	1	0	0	0	0	0	1	29.4	6	6	50.47	463	463	0	6.1134	20.5	8.2	16.8	20.3	22	28.7	3624000	0	0	0	0	0
P60842;Q14240	P60842;Q14240	4;3	2;1	2;1	Eukaryotic initiation factor 4A-I;Eukaryotic initiation factor 4A-II;Eukaryotic initiation factor 4A-II, N-terminally processed	EIF4A1;EIF4A2	sp|P60842|IF4A1_HUMAN Eukaryotic initiation factor 4A-I OS=Homo sapiens OX=9606 GN=EIF4A1 PE=1 SV=1;sp|Q14240|IF4A2_HUMAN Eukaryotic initiation factor 4A-II OS=Homo sapiens OX=9606 GN=EIF4A2 PE=1 SV=2	2	4	2	2	1	1	0	3	3	2	1	0	0	1	1	0	1	0	0	1	1	0	14	8.1	8.1	46.153	406	406;407	0	3.5753	5.7	3.9	0	8.4	8.4	5.9	5062500	1606500	0	0	1431900	2024100
P10599	P10599	2	2	2	Thioredoxin	TXN	sp|P10599|THIO_HUMAN Thioredoxin OS=Homo sapiens OX=9606 GN=TXN PE=1 SV=3	1	2	2	2	1	0	0	0	1	0	1	0	0	0	1	0	1	0	0	0	1	0	41.9	41.9	41.9	11.737	105	105	0	4.7351	22.9	0	0	0	19	0	5287100	1844900	0	0	0	3442200
P17066;P48741	P17066;P48741	6;4	1;1	1;1	Heat shock 70 kDa protein 6;Putative heat shock 70 kDa protein 7	HSPA6;HSPA7	sp|P17066|HSP76_HUMAN Heat shock 70 kDa protein 6 OS=Homo sapiens OX=9606 GN=HSPA6 PE=1 SV=2;sp|P48741|HSP77_HUMAN Putative heat shock 70 kDa protein 7 OS=Homo sapiens OX=9606 GN=HSPA7 PE=5 SV=2	2	6	1	1	1	0	0	4	5	4	0	0	0	0	1	1	0	0	0	0	1	1	11.2	1.7	1.7	71.027	643	643;367	0	3.5044	2	0	0	8.4	8.7	7.6	3437700	0	0	0	0	1467700
Q9NYZ3	Q9NYZ3	1	1	1	G2 and S phase-expressed protein 1	GTSE1	sp|Q9NYZ3|GTSE1_HUMAN G2 and S phase-expressed protein 1 OS=Homo sapiens OX=9606 GN=GTSE1 PE=1 SV=3	1	1	1	1	0	0	0	0	1	1	0	0	0	0	1	1	0	0	0	0	1	1	2.2	2.2	2.2	76.644	720	720	0	3.0523	0	0	0	0	2.2	2.2	3332700	0	0	0	0	0
P48634	P48634	2	2	2	Protein PRRC2A	PRRC2A	sp|P48634|PRC2A_HUMAN Protein PRRC2A OS=Homo sapiens OX=9606 GN=PRRC2A PE=1 SV=3	1	2	2	2	0	0	0	0	1	1	0	0	0	0	1	1	0	0	0	0	1	1	2.4	2.4	2.4	228.86	2157	2157	0	3.1941	0	0	0	0	1	1.4	3273500	0	0	0	0	0
Q9UKF6	Q9UKF6	1	1	1	Cleavage and polyadenylation specificity factor subunit 3	CPSF3	sp|Q9UKF6|CPSF3_HUMAN Cleavage and polyadenylation specificity factor subunit 3 OS=Homo sapiens OX=9606 GN=CPSF3 PE=1 SV=1	1	1	1	1	0	0	0	1	1	0	0	0	0	1	1	0	0	0	0	1	1	0	1.3	1.3	1.3	77.485	684	684	0	3.0729	0	0	0	1.3	1.3	0	3234800	0	0	0	0	3234800
Q9H4B6	Q9H4B6	1	1	1	Protein salvador homolog 1	SAV1	sp|Q9H4B6|SAV1_HUMAN Protein salvador homolog 1 OS=Homo sapiens OX=9606 GN=SAV1 PE=1 SV=2	1	1	1	1	0	0	0	1	1	0	0	0	0	1	1	0	0	0	0	1	1	0	6	6	6	44.633	383	383	0.0012469	2.7967	0	0	0	6	6	0	3174700	0	0	0	1355700	1819100
Q13144	Q13144	1	1	1	Translation initiation factor eIF-2B subunit epsilon	EIF2B5	sp|Q13144|EI2BE_HUMAN Translation initiation factor eIF-2B subunit epsilon OS=Homo sapiens OX=9606 GN=EIF2B5 PE=1 SV=3	1	1	1	1	0	1	1	1	1	0	0	1	1	1	1	0	0	1	1	1	1	0	1.9	1.9	1.9	80.379	721	721	0	3.3101	0	1.9	1.9	1.9	1.9	0	3155000	0	0	0	1849300	1305700
Q9Y2R4	Q9Y2R4	3	3	3	Probable ATP-dependent RNA helicase DDX52	DDX52	sp|Q9Y2R4|DDX52_HUMAN Probable ATP-dependent RNA helicase DDX52 OS=Homo sapiens OX=9606 GN=DDX52 PE=1 SV=3	1	3	3	3	0	0	0	1	1	1	0	0	0	1	1	1	0	0	0	1	1	1	9.3	9.3	9.3	67.497	599	599	0	4.4813	0	0	0	3.7	2.3	3.3	3134900	0	0	0	1030700	1170800
P47756	P47756	2	2	2	F-actin-capping protein subunit beta	CAPZB	sp|P47756|CAPZB_HUMAN F-actin-capping protein subunit beta OS=Homo sapiens OX=9606 GN=CAPZB PE=1 SV=4	1	2	2	2	1	1	2	0	1	1	1	1	2	0	1	1	1	1	2	0	1	1	13.7	13.7	13.7	31.35	277	277	0	39.09	4.7	4.7	13.7	0	4.7	4.7	12234000	1661600	2683000	4789500	0	1620100
P46013	P46013	3	3	3	Antigen KI-67	MKI67	sp|P46013|KI67_HUMAN Proliferation marker protein Ki-67 OS=Homo sapiens OX=9606 GN=MKI67 PE=1 SV=2	1	3	3	3	0	0	0	2	1	1	0	0	0	2	1	1	0	0	0	2	1	1	1.8	1.8	1.8	358.69	3256	3256	0	5.5518	0	0	0	1.1	0.7	0.7	3070800	0	0	0	1842500	445550
Q92665	Q92665	1	1	1	28S ribosomal protein S31, mitochondrial	MRPS31	sp|Q92665|RT31_HUMAN 28S ribosomal protein S31, mitochondrial OS=Homo sapiens OX=9606 GN=MRPS31 PE=1 SV=3	1	1	1	1	0	0	0	1	0	1	0	0	0	1	0	1	0	0	0	1	0	1	2.8	2.8	2.8	45.318	395	395	0.0012516	2.8278	0	0	0	2.8	0	2.8	3047500	0	0	0	1928600	0
Q12904	Q12904	1	1	1	Aminoacyl tRNA synthase complex-interacting multifunctional protein 1;Endothelial monocyte-activating polypeptide 2	AIMP1	sp|Q12904|AIMP1_HUMAN Aminoacyl tRNA synthase complex-interacting multifunctional protein 1 OS=Homo sapiens OX=9606 GN=AIMP1 PE=1 SV=2	1	1	1	1	1	0	0	1	1	1	1	0	0	1	1	1	1	0	0	1	1	1	5.8	5.8	5.8	34.352	312	312	0	3.4482	5.8	0	0	5.8	5.8	5.8	3532800	487940	0	0	639730	1110200
P12236;P12235	P12236;P12235	6;4	2;1	2;1	ADP/ATP translocase 3;ADP/ATP translocase 3, N-terminally processed;ADP/ATP translocase 1	SLC25A6;SLC25A4	sp|P12236|ADT3_HUMAN ADP/ATP translocase 3 OS=Homo sapiens OX=9606 GN=SLC25A6 PE=1 SV=4;sp|P12235|ADT1_HUMAN ADP/ATP translocase 1 OS=Homo sapiens OX=9606 GN=SLC25A4 PE=1 SV=4	2	6	2	2	1	0	0	1	4	2	0	0	0	0	1	1	0	0	0	0	1	1	21.8	9.4	9.4	32.866	298	298;298	0	3.5533	3.4	0	0	3.4	13.4	8.4	3015500	0	0	0	0	1087400
Q9Y4F1	Q9Y4F1	2	2	2	FERM, RhoGEF and pleckstrin domain-containing protein 1	FARP1	sp|Q9Y4F1|FARP1_HUMAN FERM, ARHGEF and pleckstrin domain-containing protein 1 OS=Homo sapiens OX=9606 GN=FARP1 PE=1 SV=1	1	2	2	2	0	0	0	1	0	1	0	0	0	1	0	1	0	0	0	1	0	1	2.5	2.5	2.5	118.63	1045	1045	0	3.9627	0	0	0	1.1	0	1.3	2964700	0	0	0	1802600	0
P50151	P50151	2	2	2	Guanine nucleotide-binding protein G(I)/G(S)/G(O) subunit gamma-10	GNG10	sp|P50151|GBG10_HUMAN Guanine nucleotide-binding protein G(I)/G(S)/G(O) subunit gamma-10 OS=Homo sapiens OX=9606 GN=GNG10 PE=1 SV=1	1	2	2	2	2	2	1	0	1	1	2	2	1	0	1	1	2	2	1	0	1	1	35.3	35.3	35.3	7.2053	68	68	0	5.2007	35.3	35.3	19.1	0	16.2	19.1	9853100	3634300	3265900	0	0	986240
Q8TF01	Q8TF01	1	1	1	Arginine/serine-rich protein PNISR	PNISR	sp|Q8TF01|PNISR_HUMAN Arginine/serine-rich protein PNISR OS=Homo sapiens OX=9606 GN=PNISR PE=1 SV=2	1	1	1	1	0	0	0	1	0	1	0	0	0	1	0	1	0	0	0	1	0	1	2.2	2.2	2.2	92.576	805	805	0	3.8191	0	0	0	2.2	0	2.2	2946300	0	0	0	1089000	0
P36873	P36873	1	1	1	Serine/threonine-protein phosphatase PP1-gamma catalytic subunit	PPP1CC	sp|P36873|PP1G_HUMAN Serine/threonine-protein phosphatase PP1-gamma catalytic subunit OS=Homo sapiens OX=9606 GN=PPP1CC PE=1 SV=1	1	1	1	1	0	0	0	1	1	0	0	0	0	1	1	0	0	0	0	1	1	0	4.3	4.3	4.3	36.983	323	323	0	3.8632	0	0	0	4.3	4.3	0	2928400	0	0	0	770410	2158000
P52907	P52907	2	1	1	F-actin-capping protein subunit alpha-1	CAPZA1	sp|P52907|CAZA1_HUMAN F-actin-capping protein subunit alpha-1 OS=Homo sapiens OX=9606 GN=CAPZA1 PE=1 SV=3	1	2	1	1	1	0	0	1	1	0	1	0	0	1	0	0	1	0	0	1	0	0	8.4	4.9	4.9	32.922	286	286	0	3.5558	4.9	0	0	4.9	3.5	0	5361500	2457800	0	0	2903700	0
Q02978	Q02978	1	1	1	Mitochondrial 2-oxoglutarate/malate carrier protein	SLC25A11	sp|Q02978|M2OM_HUMAN Mitochondrial 2-oxoglutarate/malate carrier protein OS=Homo sapiens OX=9606 GN=SLC25A11 PE=1 SV=3	1	1	1	1	1	1	0	1	1	1	1	1	0	1	1	1	1	1	0	1	1	1	5.1	5.1	5.1	34.061	314	314	0	10.67	5.1	5.1	0	5.1	5.1	5.1	5188600	1385400	906510	0	1287100	1609600
Q9NX05	Q9NX05	1	1	1	Constitutive coactivator of PPAR-gamma-like protein 2	FAM120C	sp|Q9NX05|F120C_HUMAN Constitutive coactivator of PPAR-gamma-like protein 2 OS=Homo sapiens OX=9606 GN=FAM120C PE=1 SV=3	1	1	1	1	0	0	0	1	0	1	0	0	0	1	0	1	0	0	0	1	0	1	1.1	1.1	1.1	120.59	1096	1096	0	3.601	0	0	0	1.1	0	1.1	2794600	0	0	0	1387800	0
P61964	P61964	1	1	1	WD repeat-containing protein 5	WDR5	sp|P61964|WDR5_HUMAN WD repeat-containing protein 5 OS=Homo sapiens OX=9606 GN=WDR5 PE=1 SV=1	1	1	1	1	0	0	0	0	1	0	0	0	0	0	1	0	0	0	0	0	1	0	3.9	3.9	3.9	36.588	334	334	0	3.0486	0	0	0	0	3.9	0	2779500	0	0	0	0	2779500
P63104	P63104	3	2	2	14-3-3 protein zeta/delta	YWHAZ	sp|P63104|1433Z_HUMAN 14-3-3 protein zeta/delta OS=Homo sapiens OX=9606 GN=YWHAZ PE=1 SV=1	1	3	2	2	0	1	0	2	1	0	0	1	0	1	0	0	0	1	0	1	0	0	16.3	16.3	16.3	27.745	245	245	0	146.39	0	7.3	0	9	3.3	0	2752200	0	0	0	2752200	0
P04350	P04350	28	2	1	Tubulin beta-4A chain	TUBB4A	sp|P04350|TBB4A_HUMAN Tubulin beta-4A chain OS=Homo sapiens OX=9606 GN=TUBB4A PE=1 SV=2	1	28	2	1	22	16	18	13	20	16	1	1	1	0	1	0	1	1	1	0	1	0	68.7	7.4	3.6	49.585	444	444	0	4.2695	55.2	48.6	61.9	32.2	55.2	45.5	9198600	2556000	1788200	2121500	0	2732800
Q16630	Q16630	2	2	2	Cleavage and polyadenylation specificity factor subunit 6	CPSF6	sp|Q16630|CPSF6_HUMAN Cleavage and polyadenylation specificity factor subunit 6 OS=Homo sapiens OX=9606 GN=CPSF6 PE=1 SV=2	1	2	2	2	0	0	0	0	2	0	0	0	0	0	2	0	0	0	0	0	2	0	4.9	4.9	4.9	59.209	551	551	0	5.1415	0	0	0	0	4.9	0	2728900	0	0	0	0	2728900
P60981	P60981	2	2	2	Destrin	DSTN	sp|P60981|DEST_HUMAN Destrin OS=Homo sapiens OX=9606 GN=DSTN PE=1 SV=3	1	2	2	2	2	1	1	0	1	0	2	1	1	0	1	0	2	1	1	0	1	0	17	17	17	18.506	165	165	0	7.6975	17	7.3	7.3	0	7.3	0	5979200	1779900	858090	634090	0	2707200
P06733;P09104	P06733	12;1	12;1	11;0	Alpha-enolase	ENO1	sp|P06733|ENOA_HUMAN Alpha-enolase OS=Homo sapiens OX=9606 GN=ENO1 PE=1 SV=2	2	12	12	11	11	7	5	1	0	0	11	7	5	1	0	0	10	6	4	0	0	0	52.1	52.1	48.6	47.168	434	434;434	0	183.53	46.5	35.5	23.5	3.5	0	0	202820000	123780000	67134000	9214600	2689200	0
Q9UJS0	Q9UJS0	1	1	1	Calcium-binding mitochondrial carrier protein Aralar2	SLC25A13	sp|Q9UJS0|CMC2_HUMAN Calcium-binding mitochondrial carrier protein Aralar2 OS=Homo sapiens OX=9606 GN=SLC25A13 PE=1 SV=2	1	1	1	1	0	0	0	1	0	1	0	0	0	1	0	1	0	0	0	1	0	1	2.4	2.4	2.4	74.175	675	675	0	3.5734	0	0	0	2.4	0	2.4	2670500	0	0	0	1144500	0
Q8WYQ5	Q8WYQ5	2	2	2	Microprocessor complex subunit DGCR8	DGCR8	sp|Q8WYQ5|DGCR8_HUMAN Microprocessor complex subunit DGCR8 OS=Homo sapiens OX=9606 GN=DGCR8 PE=1 SV=1	1	2	2	2	0	0	0	1	0	1	0	0	0	1	0	1	0	0	0	1	0	1	4.5	4.5	4.5	86.044	773	773	0.00125	2.8143	0	0	0	2.5	0	2.1	2662700	0	0	0	1588600	0
P40939	P40939	1	1	1	Trifunctional enzyme subunit alpha, mitochondrial;Long-chain enoyl-CoA hydratase;Long chain 3-hydroxyacyl-CoA dehydrogenase	HADHA	sp|P40939|ECHA_HUMAN Trifunctional enzyme subunit alpha, mitochondrial OS=Homo sapiens OX=9606 GN=HADHA PE=1 SV=2	1	1	1	1	0	0	0	1	1	0	0	0	0	1	1	0	0	0	0	1	1	0	3.1	3.1	3.1	82.999	763	763	0	3.2969	0	0	0	3.1	3.1	0	2639500	0	0	0	1415100	1224500
Q9HCD5	Q9HCD5	1	1	1	Nuclear receptor coactivator 5	NCOA5	sp|Q9HCD5|NCOA5_HUMAN Nuclear receptor coactivator 5 OS=Homo sapiens OX=9606 GN=NCOA5 PE=1 SV=2	1	1	1	1	0	0	0	0	0	1	0	0	0	0	0	1	0	0	0	0	0	1	6.7	6.7	6.7	65.536	579	579	0	3.3169	0	0	0	0	0	6.7	2626300	0	0	0	0	0
Q9H0A0	Q9H0A0	1	1	1	N-acetyltransferase 10	NAT10	sp|Q9H0A0|NAT10_HUMAN RNA cytidine acetyltransferase OS=Homo sapiens OX=9606 GN=NAT10 PE=1 SV=2	1	1	1	1	0	0	0	1	1	0	0	0	0	1	1	0	0	0	0	1	1	0	1.6	1.6	1.6	115.73	1025	1025	0	3.5551	0	0	0	1.6	1.6	0	2589100	0	0	0	1399400	1189600
Q14126	Q14126	3	3	3	Desmoglein-2	DSG2	sp|Q14126|DSG2_HUMAN Desmoglein-2 OS=Homo sapiens OX=9606 GN=DSG2 PE=1 SV=2	1	3	3	3	3	2	1	0	0	1	3	2	1	0	0	1	3	2	1	0	0	1	5.6	5.6	5.6	122.29	1118	1118	0	11.693	5.6	3.8	1.6	0	0	1.9	9303100	3603800	2101500	1026000	0	0
Q14980	Q14980	1	1	1	Nuclear mitotic apparatus protein 1	NUMA1	sp|Q14980|NUMA1_HUMAN Nuclear mitotic apparatus protein 1 OS=Homo sapiens OX=9606 GN=NUMA1 PE=1 SV=2	1	1	1	1	0	0	0	1	0	0	0	0	0	1	0	0	0	0	0	1	0	0	1	1	1	238.26	2115	2115	0	6.4369	0	0	0	1	0	0	2547200	0	0	0	2547200	0
P11387	P11387	1	1	1	DNA topoisomerase 1	TOP1	sp|P11387|TOP1_HUMAN DNA topoisomerase 1 OS=Homo sapiens OX=9606 GN=TOP1 PE=1 SV=2	1	1	1	1	0	0	0	0	1	1	0	0	0	0	1	1	0	0	0	0	1	1	1.7	1.7	1.7	90.725	765	765	0.002451	2.5808	0	0	0	0	1.7	1.7	2504900	0	0	0	0	0
Q53H96	Q53H96	2	2	2	Pyrroline-5-carboxylate reductase 3	PYCRL	sp|Q53H96|P5CR3_HUMAN Pyrroline-5-carboxylate reductase 3 OS=Homo sapiens OX=9606 GN=PYCR3 PE=1 SV=3	1	2	2	2	0	1	0	1	0	2	0	1	0	1	0	2	0	1	0	1	0	2	8.8	8.8	8.8	28.663	274	274	0	3.6123	0	4.7	0	4.7	0	8.8	2500000	0	0	0	0	0
Q14683	Q14683	1	1	1	Structural maintenance of chromosomes protein 1A	SMC1A	sp|Q14683|SMC1A_HUMAN Structural maintenance of chromosomes protein 1A OS=Homo sapiens OX=9606 GN=SMC1A PE=1 SV=2	1	1	1	1	0	0	0	0	0	1	0	0	0	0	0	1	0	0	0	0	0	1	2.5	2.5	2.5	143.23	1233	1233	0.0072376	2.4216	0	0	0	0	0	2.5	2432300	0	0	0	0	0
Q96LT9	Q96LT9	1	1	1	RNA-binding protein 40	RNPC3	sp|Q96LT9|RNPC3_HUMAN RNA-binding region-containing protein 3 OS=Homo sapiens OX=9606 GN=RNPC3 PE=1 SV=1	1	1	1	1	0	0	0	0	0	1	0	0	0	0	0	1	0	0	0	0	0	1	2.1	2.1	2.1	58.574	517	517	0	3.3187	0	0	0	0	0	2.1	2409300	0	0	0	0	0
Q01813	Q01813	2	2	2	ATP-dependent 6-phosphofructokinase, platelet type	PFKP	sp|Q01813|PFKAP_HUMAN ATP-dependent 6-phosphofructokinase, platelet type OS=Homo sapiens OX=9606 GN=PFKP PE=1 SV=2	1	2	2	2	0	0	0	1	1	0	0	0	0	1	1	0	0	0	0	1	1	0	3.4	3.4	3.4	85.595	784	784	0	3.0921	0	0	0	1.5	1.9	0	2389700	0	0	0	1067900	1321700
Q13155	Q13155	1	1	1	Aminoacyl tRNA synthase complex-interacting multifunctional protein 2	AIMP2	sp|Q13155|AIMP2_HUMAN Aminoacyl tRNA synthase complex-interacting multifunctional protein 2 OS=Homo sapiens OX=9606 GN=AIMP2 PE=1 SV=2	1	1	1	1	0	0	0	0	1	0	0	0	0	0	1	0	0	0	0	0	1	0	4.1	4.1	4.1	35.348	320	320	0.002439	2.5132	0	0	0	0	4.1	0	2374700	0	0	0	0	2374700
P63220	P63220	2	2	2	40S ribosomal protein S21	RPS21	sp|P63220|RS21_HUMAN 40S ribosomal protein S21 OS=Homo sapiens OX=9606 GN=RPS21 PE=1 SV=1	1	2	2	2	1	0	0	1	1	0	1	0	0	1	1	0	1	0	0	1	1	0	28.9	28.9	28.9	9.1113	83	83	0	4.0164	18.1	0	0	10.8	10.8	0	2317300	0	0	0	1005400	1311900
P78347;Q86UP8;Q6EKJ0	P78347	3;1;1	3;1;1	3;1;1	General transcription factor II-I	GTF2I	sp|P78347|GTF2I_HUMAN General transcription factor II-I OS=Homo sapiens OX=9606 GN=GTF2I PE=1 SV=2	3	3	3	3	2	1	0	0	0	1	2	1	0	0	0	1	2	1	0	0	0	1	4.9	4.9	4.9	112.42	998	998;949;949	0	6.6176	3.7	1.9	0	0	0	1.2	3460800	559530	608320	0	0	0
P50454	P50454	1	1	1	Serpin H1	SERPINH1	sp|P50454|SERPH_HUMAN Serpin H1 OS=Homo sapiens OX=9606 GN=SERPINH1 PE=1 SV=2	1	1	1	1	0	0	0	0	0	1	0	0	0	0	0	1	0	0	0	0	0	1	3.6	3.6	3.6	46.44	418	418	0	3.1203	0	0	0	0	0	3.6	2290500	0	0	0	0	0
P56537	P56537	1	1	1	Eukaryotic translation initiation factor 6	EIF6	sp|P56537|IF6_HUMAN Eukaryotic translation initiation factor 6 OS=Homo sapiens OX=9606 GN=EIF6 PE=1 SV=1	1	1	1	1	0	0	0	0	1	0	0	0	0	0	1	0	0	0	0	0	1	0	5.7	5.7	5.7	26.599	245	245	0.002442	2.5207	0	0	0	0	5.7	0	2260300	0	0	0	0	2260300
Q9NS87	Q9NS87	1	1	1	Kinesin-like protein KIF15	KIF15	sp|Q9NS87|KIF15_HUMAN Kinesin-like protein KIF15 OS=Homo sapiens OX=9606 GN=KIF15 PE=1 SV=1	1	1	1	1	0	0	0	1	0	0	0	0	0	1	0	0	0	0	0	1	0	0	0.6	0.6	0.6	160.16	1388	1388	0.006068	2.4731	0	0	0	0.6	0	0	2157600	0	0	0	2157600	0
P62633	P62633	1	1	1	Cellular nucleic acid-binding protein	CNBP	sp|P62633|CNBP_HUMAN Cellular nucleic acid-binding protein OS=Homo sapiens OX=9606 GN=CNBP PE=1 SV=1	1	1	1	1	0	0	0	1	0	0	0	0	0	1	0	0	0	0	0	1	0	0	5.6	5.6	5.6	19.463	177	177	0	5.3244	0	0	0	5.6	0	0	2140300	0	0	0	2140300	0
Q12996	Q12996	1	1	1	Cleavage stimulation factor subunit 3	CSTF3	sp|Q12996|CSTF3_HUMAN Cleavage stimulation factor subunit 3 OS=Homo sapiens OX=9606 GN=CSTF3 PE=1 SV=1	1	1	1	1	0	0	0	0	1	0	0	0	0	0	1	0	0	0	0	0	1	0	3.5	3.5	3.5	82.921	717	717	0	3.3101	0	0	0	0	3.5	0	2008100	0	0	0	0	2008100
Q8WWI1	Q8WWI1	7	7	7	LIM domain only protein 7	LMO7	sp|Q8WWI1|LMO7_HUMAN LIM domain only protein 7 OS=Homo sapiens OX=9606 GN=LMO7 PE=1 SV=3	1	7	7	7	4	5	0	1	1	0	4	5	0	1	1	0	4	5	0	1	1	0	5.1	5.1	5.1	192.69	1683	1683	0	17.513	3.5	3.3	0	0.9	0.9	0	7167000	3121300	2072100	0	0	1973700
Q93077;Q7L7L0;P04908;P16104;Q8IUE6;Q96QV6	Q93077;Q7L7L0;P04908;P16104	5;5;5;3;2;2	1;1;1;0;0;0	1;1;1;0;0;0	Histone H2A type 1-C;Histone H2A type 3;Histone H2A type 1-B/E;Histone H2AX	HIST1H2AC;HIST3H2A;HIST1H2AB;H2AFX	sp|Q93077|H2A1C_HUMAN Histone H2A type 1-C OS=Homo sapiens OX=9606 GN=HIST1H2AC PE=1 SV=3;sp|Q7L7L0|H2A3_HUMAN Histone H2A type 3 OS=Homo sapiens OX=9606 GN=HIST3H2A PE=1 SV=3;sp|P04908|H2A1B_HUMAN Histone H2A type 1-B/E OS=Homo sapiens OX=9606 GN=HIST1H2A	6	5	1	1	2	3	1	4	4	3	0	0	0	0	1	0	0	0	0	0	1	0	37.7	13.8	13.8	14.105	130	130;130;130;143;130;131	0	3.2474	25.4	32.3	14.6	34.6	35.4	32.3	1938400	0	0	0	0	1938400
P26640	P26640	1	1	1	Valine--tRNA ligase	VARS	sp|P26640|SYVC_HUMAN Valine--tRNA ligase OS=Homo sapiens OX=9606 GN=VARS PE=1 SV=4	1	1	1	1	0	0	0	1	0	0	0	0	0	1	0	0	0	0	0	1	0	0	1.3	1.3	1.3	140.47	1264	1264	0	3.2414	0	0	0	1.3	0	0	1935700	0	0	0	1935700	0
P25205	P25205	2	2	2	DNA replication licensing factor MCM3	MCM3	sp|P25205|MCM3_HUMAN DNA replication licensing factor MCM3 OS=Homo sapiens OX=9606 GN=MCM3 PE=1 SV=3	1	2	2	2	0	0	0	1	0	1	0	0	0	1	0	1	0	0	0	1	0	1	2.6	2.6	2.6	90.98	808	808	0	4.8065	0	0	0	1.1	0	1.5	1856600	0	0	0	618790	0
Q9BXF6	Q9BXF6	1	1	1	Rab11 family-interacting protein 5	RAB11FIP5	sp|Q9BXF6|RFIP5_HUMAN Rab11 family-interacting protein 5 OS=Homo sapiens OX=9606 GN=RAB11FIP5 PE=1 SV=1	1	1	1	1	0	0	0	0	0	1	0	0	0	0	0	1	0	0	0	0	0	1	2.1	2.1	2.1	70.414	653	653	0.002454	2.5841	0	0	0	0	0	2.1	1839300	0	0	0	0	0
Q8WUM0	Q8WUM0	1	1	1	Nuclear pore complex protein Nup133	NUP133	sp|Q8WUM0|NU133_HUMAN Nuclear pore complex protein Nup133 OS=Homo sapiens OX=9606 GN=NUP133 PE=1 SV=2	1	1	1	1	0	0	0	1	1	0	0	0	0	1	1	0	0	0	0	1	1	0	1.7	1.7	1.7	128.98	1156	1156	0	3.3973	0	0	0	1.7	1.7	0	1824200	0	0	0	785110	1039100
Q9UHK0	Q9UHK0	2	2	2	Nuclear fragile X mental retardation-interacting protein 1	NUFIP1	sp|Q9UHK0|NUFP1_HUMAN Nuclear fragile X mental retardation-interacting protein 1 OS=Homo sapiens OX=9606 GN=NUFIP1 PE=1 SV=2	1	2	2	2	0	0	0	1	0	1	0	0	0	1	0	1	0	0	0	1	0	1	5.1	5.1	5.1	56.299	495	495	0.0024722	2.6624	0	0	0	2.8	0	2.2	1816600	0	0	0	927390	0
P09874	P09874	1	1	1	Poly [ADP-ribose] polymerase 1	PARP1	sp|P09874|PARP1_HUMAN Poly [ADP-ribose] polymerase 1 OS=Homo sapiens OX=9606 GN=PARP1 PE=1 SV=4	1	1	1	1	1	0	0	1	1	0	1	0	0	1	1	0	1	0	0	1	1	0	1.5	1.5	1.5	113.08	1014	1014	0.0012484	2.8082	1.5	0	0	1.5	1.5	0	2358000	545590	0	0	644240	1168200
Q16576	Q16576	1	1	1	Histone-binding protein RBBP7	RBBP7	sp|Q16576|RBBP7_HUMAN Histone-binding protein RBBP7 OS=Homo sapiens OX=9606 GN=RBBP7 PE=1 SV=1	1	1	1	1	0	0	0	0	1	0	0	0	0	0	1	0	0	0	0	0	1	0	3.1	3.1	3.1	47.82	425	425	0	5.9011	0	0	0	0	3.1	0	1807800	0	0	0	0	1807800
Q9BQ70	Q9BQ70	1	1	1	Transcription factor 25	TCF25	sp|Q9BQ70|TCF25_HUMAN Transcription factor 25 OS=Homo sapiens OX=9606 GN=TCF25 PE=1 SV=1	1	1	1	1	0	0	0	1	1	1	0	0	0	1	1	1	0	0	0	1	1	1	3.4	3.4	3.4	76.666	676	676	0	3.6528	0	0	0	3.4	3.4	3.4	1775200	0	0	0	1775200	0
P32780	P32780	1	1	1	General transcription factor IIH subunit 1	GTF2H1	sp|P32780|TF2H1_HUMAN General transcription factor IIH subunit 1 OS=Homo sapiens OX=9606 GN=GTF2H1 PE=1 SV=1	1	1	1	1	0	0	0	0	0	1	0	0	0	0	0	1	0	0	0	0	0	1	2.9	2.9	2.9	62.031	548	548	0	3.3926	0	0	0	0	0	2.9	1693700	0	0	0	0	0
A0A0G2JPF8;P0DMR1;O60812;B7ZW38	A0A0G2JPF8;P0DMR1;O60812;B7ZW38	8;8;8;8	1;1;1;1	1;1;1;1	Heterogeneous nuclear ribonucleoprotein C-like 4;Heterogeneous nuclear ribonucleoprotein C-like 1;Heterogeneous nuclear ribonucleoprotein C-like 3	HNRNPCL4;HNRNPCL1;HNRNPCL3	tr|A0A0G2JPF8|A0A0G2JPF8_HUMAN Heterogeneous nuclear ribonucleoprotein C-like 4 OS=Homo sapiens OX=9606 GN=HNRNPCL4 PE=4 SV=1;sp|P0DMR1|HNRC4_HUMAN Heterogeneous nuclear ribonucleoprotein C-like 4 OS=Homo sapiens OX=9606 GN=HNRNPCL4 PE=3 SV=1;sp|O60812|HNR	4	8	1	1	2	2	0	8	7	7	0	0	0	1	0	0	0	0	0	1	0	0	14	5.5	5.5	32.057	293	293;293;293;293	0.0095352	2.2908	4.4	4.4	0	14	8.5	8.5	1688600	0	0	0	1688600	0
Q15149	Q15149	2	2	2	Plectin	PLEC	sp|Q15149|PLEC_HUMAN Plectin OS=Homo sapiens OX=9606 GN=PLEC PE=1 SV=3	1	2	2	2	0	0	0	0	2	0	0	0	0	0	2	0	0	0	0	0	2	0	0.5	0.5	0.5	531.78	4684	4684	0.0084034	2.377	0	0	0	0	0.5	0	1644200	0	0	0	0	1644200
Q96P11	Q96P11	1	1	1	Probable 28S rRNA (cytosine-C(5))-methyltransferase	NSUN5	sp|Q96P11|NSUN5_HUMAN Probable 28S rRNA (cytosine-C(5))-methyltransferase OS=Homo sapiens OX=9606 GN=NSUN5 PE=1 SV=2	1	1	1	1	0	0	0	1	0	0	0	0	0	1	0	0	0	0	0	1	0	0	6.8	6.8	6.8	46.691	429	429	0	3.042	0	0	0	6.8	0	0	1593500	0	0	0	1593500	0
Q9NZT1	Q9NZT1	1	1	1	Calmodulin-like protein 5	CALML5	sp|Q9NZT1|CALL5_HUMAN Calmodulin-like protein 5 OS=Homo sapiens OX=9606 GN=CALML5 PE=1 SV=2	1	1	1	1	0	0	0	0	1	0	0	0	0	0	1	0	0	0	0	0	1	0	9.6	9.6	9.6	15.892	146	146	0	2.9201	0	0	0	0	9.6	0	1521200	0	0	0	0	1521200
Q8WXI9;Q86YP4	Q8WXI9;Q86YP4	1;1	1;1	1;1	Transcriptional repressor p66-beta;Transcriptional repressor p66-alpha	GATAD2B;GATAD2A	sp|Q8WXI9|P66B_HUMAN Transcriptional repressor p66-beta OS=Homo sapiens OX=9606 GN=GATAD2B PE=1 SV=1;sp|Q86YP4|P66A_HUMAN Transcriptional repressor p66-alpha OS=Homo sapiens OX=9606 GN=GATAD2A PE=1 SV=1	2	1	1	1	0	0	0	1	0	0	0	0	0	1	0	0	0	0	0	1	0	0	1.9	1.9	1.9	65.26	593	593;633	0	12.541	0	0	0	1.9	0	0	1514900	0	0	0	1514900	0
Q15154	Q15154	1	1	1	Pericentriolar material 1 protein	PCM1	sp|Q15154|PCM1_HUMAN Pericentriolar material 1 protein OS=Homo sapiens OX=9606 GN=PCM1 PE=1 SV=5	1	1	1	1	1	0	0	0	0	1	1	0	0	0	0	1	1	0	0	0	0	1	0.5	0.5	0.5	228.54	2024	2024	0.0012422	2.7135	0.5	0	0	0	0	0.5	2065000	575880	0	0	0	0
Q9H4H8	Q9H4H8	2	2	2	Protein FAM83D	FAM83D	sp|Q9H4H8|FA83D_HUMAN Protein FAM83D OS=Homo sapiens OX=9606 GN=FAM83D PE=1 SV=3	1	2	2	2	0	0	0	0	1	1	0	0	0	0	1	1	0	0	0	0	1	1	3.6	3.6	3.6	64.424	585	585	0	3.8148	0	0	0	0	1.5	2.1	1489200	0	0	0	0	757380
Q9GZS3	Q9GZS3	1	1	1	WD repeat-containing protein 61;WD repeat-containing protein 61, N-terminally processed	WDR61	sp|Q9GZS3|WDR61_HUMAN WD repeat-containing protein 61 OS=Homo sapiens OX=9606 GN=WDR61 PE=1 SV=1	1	1	1	1	0	0	0	0	0	1	0	0	0	0	0	1	0	0	0	0	0	1	5.6	5.6	5.6	33.58	305	305	0.0024752	2.6788	0	0	0	0	0	5.6	1485300	0	0	0	0	0
O75683	O75683	1	1	1	Surfeit locus protein 6	SURF6	sp|O75683|SURF6_HUMAN Surfeit locus protein 6 OS=Homo sapiens OX=9606 GN=SURF6 PE=1 SV=3	1	1	1	1	0	0	0	0	0	1	0	0	0	0	0	1	0	0	0	0	0	1	4.2	4.2	4.2	41.45	361	361	0	3.4817	0	0	0	0	0	4.2	1425400	0	0	0	0	0
Q9UK61	Q9UK61	2	2	2	Protein FAM208A	FAM208A	sp|Q9UK61|TASOR_HUMAN Protein TASOR OS=Homo sapiens OX=9606 GN=FAM208A PE=1 SV=3	1	2	2	2	0	0	0	2	1	1	0	0	0	2	1	1	0	0	0	2	1	1	1.7	1.7	1.7	189.03	1670	1670	0	4.7493	0	0	0	1.7	1.1	1.1	1394600	0	0	0	1394600	0
P38432	P38432	1	1	1	Coilin	COIL	sp|P38432|COIL_HUMAN Coilin OS=Homo sapiens OX=9606 GN=COIL PE=1 SV=1	1	1	1	1	0	0	0	0	1	0	0	0	0	0	1	0	0	0	0	0	1	0	3.3	3.3	3.3	62.608	576	576	0.0083732	2.3495	0	0	0	0	3.3	0	1330300	0	0	0	0	1330300
Q7Z417	Q7Z417	3	3	3	Nuclear fragile X mental retardation-interacting protein 2	NUFIP2	sp|Q7Z417|NUFP2_HUMAN Nuclear fragile X mental retardation-interacting protein 2 OS=Homo sapiens OX=9606 GN=NUFIP2 PE=1 SV=1	1	3	3	3	0	0	0	0	2	1	0	0	0	0	2	1	0	0	0	0	2	1	5.3	5.3	5.3	76.12	695	695	0	6.5688	0	0	0	0	3.3	2	1319500	0	0	0	0	1319500
Q9NUL3	Q9NUL3	1	1	1	Double-stranded RNA-binding protein Staufen homolog 2	STAU2	sp|Q9NUL3|STAU2_HUMAN Double-stranded RNA-binding protein Staufen homolog 2 OS=Homo sapiens OX=9606 GN=STAU2 PE=1 SV=2	1	1	1	1	0	0	0	0	1	1	0	0	0	0	1	1	0	0	0	0	1	1	3	3	3	62.608	570	570	0	3.7028	0	0	0	0	3	3	1318200	0	0	0	0	0
Q8N1B3	Q8N1B3	2	2	2	Cyclin-related protein FAM58A	FAM58A	sp|Q8N1B3|CCNQ_HUMAN Cyclin-Q OS=Homo sapiens OX=9606 GN=CCNQ PE=1 SV=2	1	2	2	2	0	0	0	0	2	1	0	0	0	0	2	1	0	0	0	0	2	1	11.3	11.3	11.3	28.368	248	248	0	3.733	0	0	0	0	11.3	5.6	1300000	0	0	0	0	1300000
Q9NXV6	Q9NXV6	1	1	1	CDKN2A-interacting protein	CDKN2AIP	sp|Q9NXV6|CARF_HUMAN CDKN2A-interacting protein OS=Homo sapiens OX=9606 GN=CDKN2AIP PE=1 SV=3	1	1	1	1	0	0	0	0	1	0	0	0	0	0	1	0	0	0	0	0	1	0	2.2	2.2	2.2	61.124	580	580	0.0012438	2.7295	0	0	0	0	2.2	0	1295700	0	0	0	0	1295700
Q9BT23	Q9BT23	1	1	1	LIM domain-containing protein 2	LIMD2	sp|Q9BT23|LIMD2_HUMAN LIM domain-containing protein 2 OS=Homo sapiens OX=9606 GN=LIMD2 PE=1 SV=1	1	1	1	1	0	0	1	1	0	0	0	0	1	1	0	0	0	0	1	1	0	0	20.5	20.5	20.5	14.07	127	127	0	3.569	0	0	20.5	20.5	0	0	2510200	0	0	1225500	1284600	0
P47755	P47755	2	2	1	F-actin-capping protein subunit alpha-2	CAPZA2	sp|P47755|CAZA2_HUMAN F-actin-capping protein subunit alpha-2 OS=Homo sapiens OX=9606 GN=CAPZA2 PE=1 SV=3	1	2	2	1	1	1	1	0	1	0	1	1	1	0	1	0	1	1	1	0	0	0	8.4	8.4	4.9	32.949	286	286	0	5.5276	4.9	4.9	4.9	0	3.5	0	6386100	1934300	1842900	1374400	0	1234500
P67870	P67870	1	1	1	Casein kinase II subunit beta	CSNK2B	sp|P67870|CSK2B_HUMAN Casein kinase II subunit beta OS=Homo sapiens OX=9606 GN=CSNK2B PE=1 SV=1	1	1	1	1	0	0	0	0	1	0	0	0	0	0	1	0	0	0	0	0	1	0	7.9	7.9	7.9	24.942	215	215	0	3.7313	0	0	0	0	7.9	0	1230000	0	0	0	0	1230000
Q14160	Q14160	1	1	1	Protein scribble homolog	SCRIB	sp|Q14160|SCRIB_HUMAN Protein scribble homolog OS=Homo sapiens OX=9606 GN=SCRIB PE=1 SV=4	1	1	1	1	0	0	0	0	1	0	0	0	0	0	1	0	0	0	0	0	1	0	1.3	1.3	1.3	174.88	1630	1630	0.0060533	2.4629	0	0	0	0	1.3	0	1220300	0	0	0	0	1220300
P61224;A6NIZ1;P62834	P61224;A6NIZ1;P62834	2;2;1	2;2;1	2;2;1	Ras-related protein Rap-1b;Ras-related protein Rap-1b-like protein;Ras-related protein Rap-1A	RAP1B;RAP1A	sp|P61224|RAP1B_HUMAN Ras-related protein Rap-1b OS=Homo sapiens OX=9606 GN=RAP1B PE=1 SV=1;sp|A6NIZ1|RP1BL_HUMAN Ras-related protein Rap-1b-like protein OS=Homo sapiens OX=9606 PE=2 SV=1;sp|P62834|RAP1A_HUMAN Ras-related protein Rap-1A OS=Homo sapiens OX=	3	2	2	2	1	0	0	0	1	0	1	0	0	0	1	0	1	0	0	0	1	0	14.7	14.7	14.7	20.825	184	184;184;184	0	3.4915	7.1	0	0	0	7.6	0	2387100	1250500	0	0	0	1136600
Q8NEJ9	Q8NEJ9	2	2	2	Neuroguidin	NGDN	sp|Q8NEJ9|NGDN_HUMAN Neuroguidin OS=Homo sapiens OX=9606 GN=NGDN PE=1 SV=1	1	2	2	2	0	0	0	2	0	0	0	0	0	2	0	0	0	0	0	2	0	0	10.2	10.2	10.2	35.894	315	315	0	26.048	0	0	0	10.2	0	0	1096100	0	0	0	1096100	0
Q6PK04	Q6PK04	1	1	1	Coiled-coil domain-containing protein 137	CCDC137	sp|Q6PK04|CC137_HUMAN Coiled-coil domain-containing protein 137 OS=Homo sapiens OX=9606 GN=CCDC137 PE=1 SV=1	1	1	1	1	0	0	0	0	0	1	0	0	0	0	0	1	0	0	0	0	0	1	6.2	6.2	6.2	33.231	289	289	0.0024783	2.6822	0	0	0	0	0	6.2	1085100	0	0	0	0	0
Q9UQE7	Q9UQE7	1	1	1	Structural maintenance of chromosomes protein 3	SMC3	sp|Q9UQE7|SMC3_HUMAN Structural maintenance of chromosomes protein 3 OS=Homo sapiens OX=9606 GN=SMC3 PE=1 SV=2	1	1	1	1	0	0	0	0	1	0	0	0	0	0	1	0	0	0	0	0	1	0	1.4	1.4	1.4	141.54	1217	1217	0	2.8913	0	0	0	0	1.4	0	1078000	0	0	0	0	1078000
Q9Y3B9	Q9Y3B9	1	1	1	RRP15-like protein	RRP15	sp|Q9Y3B9|RRP15_HUMAN RRP15-like protein OS=Homo sapiens OX=9606 GN=RRP15 PE=1 SV=2	1	1	1	1	0	0	0	1	0	0	0	0	0	1	0	0	0	0	0	1	0	0	5	5	5	31.484	282	282	0.0024331	2.4933	0	0	0	5	0	0	1045200	0	0	0	1045200	0
P78406	P78406	1	1	1	mRNA export factor	RAE1	sp|P78406|RAE1L_HUMAN mRNA export factor OS=Homo sapiens OX=9606 GN=RAE1 PE=1 SV=1	1	1	1	1	0	0	0	0	0	1	0	0	0	0	0	1	0	0	0	0	0	1	4.1	4.1	4.1	40.968	368	368	0	3.0751	0	0	0	0	0	4.1	1039600	0	0	0	0	0
P46821	P46821	2	2	2	Microtubule-associated protein 1B;MAP1B heavy chain;MAP1 light chain LC1	MAP1B	sp|P46821|MAP1B_HUMAN Microtubule-associated protein 1B OS=Homo sapiens OX=9606 GN=MAP1B PE=1 SV=2	1	2	2	2	1	0	0	0	1	0	1	0	0	0	1	0	1	0	0	0	1	0	1.1	1.1	1.1	270.63	2468	2468	0	4.0631	0.5	0	0	0	0.6	0	1648200	670840	0	0	0	977350
Q12797	Q12797	1	1	1	Aspartyl/asparaginyl beta-hydroxylase	ASPH	sp|Q12797|ASPH_HUMAN Aspartyl/asparaginyl beta-hydroxylase OS=Homo sapiens OX=9606 GN=ASPH PE=1 SV=3	1	1	1	1	0	0	0	0	1	0	0	0	0	0	1	0	0	0	0	0	1	0	2.2	2.2	2.2	85.862	758	758	0	3.106	0	0	0	0	2.2	0	968060	0	0	0	0	968060
Q8WVV9	Q8WVV9	1	1	1	Heterogeneous nuclear ribonucleoprotein L-like	HNRNPLL	sp|Q8WVV9|HNRLL_HUMAN Heterogeneous nuclear ribonucleoprotein L-like OS=Homo sapiens OX=9606 GN=HNRNPLL PE=1 SV=1	1	1	1	1	0	0	0	0	1	0	0	0	0	0	1	0	0	0	0	0	1	0	3.3	3.3	3.3	60.082	542	542	0	2.9345	0	0	0	0	3.3	0	917350	0	0	0	0	917350
Q9UKJ3	Q9UKJ3	2	2	2	G patch domain-containing protein 8	GPATCH8	sp|Q9UKJ3|GPTC8_HUMAN G patch domain-containing protein 8 OS=Homo sapiens OX=9606 GN=GPATCH8 PE=1 SV=2	1	2	2	2	0	0	0	1	1	1	0	0	0	1	1	1	0	0	0	1	1	1	1.2	1.2	1.2	164.2	1502	1502	0	4.3673	0	0	0	0.6	0.6	0.6	911650	0	0	0	0	0
P05023;P13637;P50993;Q13733	P05023;P13637;P50993	6;4;3;1	6;4;3;1	6;4;3;1	Sodium/potassium-transporting ATPase subunit alpha-1;Sodium/potassium-transporting ATPase subunit alpha-3;Sodium/potassium-transporting ATPase subunit alpha-2	ATP1A1;ATP1A3;ATP1A2	sp|P05023|AT1A1_HUMAN Sodium/potassium-transporting ATPase subunit alpha-1 OS=Homo sapiens OX=9606 GN=ATP1A1 PE=1 SV=1;sp|P13637|AT1A3_HUMAN Sodium/potassium-transporting ATPase subunit alpha-3 OS=Homo sapiens OX=9606 GN=ATP1A3 PE=1 SV=3;sp|P50993|AT1A2_HU	4	6	6	6	3	4	1	0	1	0	3	4	1	0	1	0	3	4	1	0	1	0	9.8	9.8	9.8	112.89	1023	1023;1013;1020;1029	0	14.729	5.5	6.8	2.5	0	1.8	0	7923000	3416000	2832100	783890	0	891040
Q08945	Q08945	1	1	1	FACT complex subunit SSRP1	SSRP1	sp|Q08945|SSRP1_HUMAN FACT complex subunit SSRP1 OS=Homo sapiens OX=9606 GN=SSRP1 PE=1 SV=1	1	1	1	1	0	0	0	0	1	0	0	0	0	0	1	0	0	0	0	0	1	0	2	2	2	81.074	709	709	0	3.8035	0	0	0	0	2	0	888720	0	0	0	0	888720
P07737	P07737	2	2	2	Profilin-1	PFN1	sp|P07737|PROF1_HUMAN Profilin-1 OS=Homo sapiens OX=9606 GN=PFN1 PE=1 SV=2	1	2	2	2	2	1	0	1	0	0	2	1	0	1	0	0	2	1	0	1	0	0	25	25	25	15.054	140	140	0	10.319	25	11.4	0	11.4	0	0	2749800	592180	1367400	0	790260	0
Q13409	Q13409	1	1	1	Cytoplasmic dynein 1 intermediate chain 2	DYNC1I2	sp|Q13409|DC1I2_HUMAN Cytoplasmic dynein 1 intermediate chain 2 OS=Homo sapiens OX=9606 GN=DYNC1I2 PE=1 SV=3	1	1	1	1	0	0	1	0	1	0	0	0	1	0	1	0	0	0	1	0	1	0	3.4	3.4	3.4	71.456	638	638	0.0072115	2.3831	0	0	3.4	0	3.4	0	0	0	0	0	0	0
O14893	O14893	1	1	1	Gem-associated protein 2	GEMIN2	sp|O14893|GEMI2_HUMAN Gem-associated protein 2 OS=Homo sapiens OX=9606 GN=GEMIN2 PE=1 SV=1	1	1	1	1	0	0	0	1	0	1	0	0	0	1	0	1	0	0	0	1	0	1	7.1	7.1	7.1	31.585	280	280	0.0012531	2.8459	0	0	0	7.1	0	7.1	0	0	0	0	0	0
Q6IQ49	Q6IQ49	1	1	1	Protein SDE2 homolog	SDE2	sp|Q6IQ49|SDE2_HUMAN Replication stress response regulator SDE2 OS=Homo sapiens OX=9606 GN=SDE2 PE=1 SV=1	1	1	1	1	0	0	0	0	0	1	0	0	0	0	0	1	0	0	0	0	0	1	4.7	4.7	4.7	49.741	451	451	0.0083933	2.3637	0	0	0	0	0	4.7	0	0	0	0	0	0
Q7Z7L1	Q7Z7L1	1	1	1	Schlafen family member 11	SLFN11	sp|Q7Z7L1|SLN11_HUMAN Schlafen family member 11 OS=Homo sapiens OX=9606 GN=SLFN11 PE=1 SV=2	1	1	1	1	1	0	0	0	0	0	1	0	0	0	0	0	1	0	0	0	0	0	1.6	1.6	1.6	102.83	901	901	0.0072289	2.4208	1.6	0	0	0	0	0	0	0	0	0	0	0
O00308	O00308	1	1	1	NEDD4-like E3 ubiquitin-protein ligase WWP2	WWP2	sp|O00308|WWP2_HUMAN NEDD4-like E3 ubiquitin-protein ligase WWP2 OS=Homo sapiens OX=9606 GN=WWP2 PE=1 SV=2	1	1	1	1	0	0	0	0	1	0	0	0	0	0	1	0	0	0	0	0	1	0	1.5	1.5	1.5	98.911	870	870	0	3.9205	0	0	0	0	1.5	0	0	0	0	0	0	0
O14639	O14639	1	1	1	Actin-binding LIM protein 1	ABLIM1	sp|O14639|ABLM1_HUMAN Actin-binding LIM protein 1 OS=Homo sapiens OX=9606 GN=ABLIM1 PE=1 SV=3	1	1	1	1	1	1	0	0	0	0	1	1	0	0	0	0	1	1	0	0	0	0	1.8	1.8	1.8	87.687	778	778	0.0072551	2.4283	1.8	1.8	0	0	0	0	1484200	577630	906580	0	0	0
O43707	O43707	1	1	1	Alpha-actinin-4	ACTN4	sp|O43707|ACTN4_HUMAN Alpha-actinin-4 OS=Homo sapiens OX=9606 GN=ACTN4 PE=1 SV=2	1	1	1	1	1	0	0	0	0	0	1	0	0	0	0	0	1	0	0	0	0	0	4.3	4.3	4.3	104.85	911	911	0	10.702	4.3	0	0	0	0	0	4472700	4472700	0	0	0	0
P15121	P15121	3	3	3	Aldose reductase	AKR1B1	sp|P15121|ALDR_HUMAN Aldose reductase OS=Homo sapiens OX=9606 GN=AKR1B1 PE=1 SV=3	1	3	3	3	2	0	1	0	0	0	2	0	1	0	0	0	2	0	1	0	0	0	21.8	21.8	21.8	35.853	316	316	0	52.697	14.9	0	7	0	0	0	27273000	24895000	0	2378200	0	0
O60218;C9JRZ8	O60218;C9JRZ8	1;1	1;1	1;1	Aldo-keto reductase family 1 member B10;Aldo-keto reductase family 1 member B15	AKR1B10;AKR1B15	sp|O60218|AK1BA_HUMAN Aldo-keto reductase family 1 member B10 OS=Homo sapiens OX=9606 GN=AKR1B10 PE=1 SV=2;sp|C9JRZ8|AK1BF_HUMAN Aldo-keto reductase family 1 member B15 OS=Homo sapiens OX=9606 GN=AKR1B15 PE=1 SV=2	2	1	1	1	1	0	0	0	0	0	1	0	0	0	0	0	1	0	0	0	0	0	5.1	5.1	5.1	36.019	316	316;316	0	4.357	5.1	0	0	0	0	0	6352300	6352300	0	0	0	0
Q04828;P52895	Q04828;P52895	1;1	1;1	1;1	Aldo-keto reductase family 1 member C1;Aldo-keto reductase family 1 member C2	AKR1C1;AKR1C2	sp|Q04828|AK1C1_HUMAN Aldo-keto reductase family 1 member C1 OS=Homo sapiens OX=9606 GN=AKR1C1 PE=1 SV=1;sp|P52895|AK1C2_HUMAN Aldo-keto reductase family 1 member C2 OS=Homo sapiens OX=9606 GN=AKR1C2 PE=1 SV=3	2	1	1	1	1	0	1	0	0	0	1	0	1	0	0	0	1	0	1	0	0	0	8.4	8.4	8.4	36.788	323	323;323	0	26.131	8.4	0	8.4	0	0	0	82898000	55096000	0	27802000	0	0
P00352	P00352	1	1	1	Retinal dehydrogenase 1	ALDH1A1	sp|P00352|AL1A1_HUMAN Retinal dehydrogenase 1 OS=Homo sapiens OX=9606 GN=ALDH1A1 PE=1 SV=2	1	1	1	1	0	0	1	0	0	0	0	0	1	0	0	0	0	0	1	0	0	0	4.4	4.4	4.4	54.861	501	501	0	7.0699	0	0	4.4	0	0	0	1875800	0	0	1875800	0	0
P04075	P04075	4	4	4	Fructose-bisphosphate aldolase A	ALDOA	sp|P04075|ALDOA_HUMAN Fructose-bisphosphate aldolase A OS=Homo sapiens OX=9606 GN=ALDOA PE=1 SV=2	1	4	4	4	4	2	2	0	0	0	4	2	2	0	0	0	4	2	2	0	0	0	22.5	22.5	22.5	39.42	364	364	0	88.438	22.5	8.2	8.2	0	0	0	56860000	39536000	11396000	5927300	0	0
P04083	P04083	1	1	1	Annexin A1	ANXA1	sp|P04083|ANXA1_HUMAN Annexin A1 OS=Homo sapiens OX=9606 GN=ANXA1 PE=1 SV=2	1	1	1	1	1	1	0	0	0	0	1	1	0	0	0	0	1	1	0	0	0	0	4.3	4.3	4.3	38.714	346	346	0	38.598	4.3	4.3	0	0	0	0	28793000	28793000	0	0	0	0
P07355;A6NMY6	P07355;A6NMY6	3;3	3;3	3;3	Annexin A2;Putative annexin A2-like protein	ANXA2;ANXA2P2	sp|P07355|ANXA2_HUMAN Annexin A2 OS=Homo sapiens OX=9606 GN=ANXA2 PE=1 SV=2;sp|A6NMY6|AXA2L_HUMAN Putative annexin A2-like protein OS=Homo sapiens OX=9606 GN=ANXA2P2 PE=5 SV=2	2	3	3	3	3	2	1	1	0	0	3	2	1	1	0	0	3	2	1	1	0	0	15.9	15.9	15.9	38.604	339	339;339	0	93.028	15.9	13.3	4.7	4.7	0	0	151490000	91532000	50703000	9253900	0	0
O75947	O75947	1	1	1	ATP synthase subunit d, mitochondrial	ATP5H	sp|O75947|ATP5H_HUMAN ATP synthase subunit d, mitochondrial OS=Homo sapiens OX=9606 GN=ATP5PD PE=1 SV=3	1	1	1	1	0	0	1	0	0	0	0	0	1	0	0	0	0	0	1	0	0	0	10.6	10.6	10.6	18.491	161	161	0.0083832	2.3572	0	0	10.6	0	0	0	835250	0	0	835250	0	0
Q01518	Q01518	2	2	2	Adenylyl cyclase-associated protein 1	CAP1	sp|Q01518|CAP1_HUMAN Adenylyl cyclase-associated protein 1 OS=Homo sapiens OX=9606 GN=CAP1 PE=1 SV=5	1	2	2	2	1	1	1	0	0	0	1	1	1	0	0	0	1	1	1	0	0	0	4	4	4	51.901	475	475	0	10.253	3.8	4	3.8	0	0	0	6335200	0	6335200	0	0	0
O76031	O76031	3	3	3	ATP-dependent Clp protease ATP-binding subunit clpX-like, mitochondrial	CLPX	sp|O76031|CLPX_HUMAN ATP-dependent Clp protease ATP-binding subunit clpX-like, mitochondrial OS=Homo sapiens OX=9606 GN=CLPX PE=1 SV=2	1	3	3	3	3	1	3	0	0	0	3	1	3	0	0	0	3	1	3	0	0	0	6	6	6	69.223	633	633	0	6.3873	6	1.9	6	0	0	0	4783000	2325800	728800	1728400	0	0
P10606	P10606	1	1	1	Cytochrome c oxidase subunit 5B, mitochondrial	COX5B	sp|P10606|COX5B_HUMAN Cytochrome c oxidase subunit 5B, mitochondrial OS=Homo sapiens OX=9606 GN=COX5B PE=1 SV=2	1	1	1	1	1	0	0	0	0	0	1	0	0	0	0	0	1	0	0	0	0	0	16.3	16.3	16.3	13.696	129	129	0	3.9878	16.3	0	0	0	0	0	1500400	1500400	0	0	0	0
P10515	P10515	8	8	8	Dihydrolipoyllysine-residue acetyltransferase component of pyruvate dehydrogenase complex, mitochondrial	DLAT	sp|P10515|ODP2_HUMAN Dihydrolipoyllysine-residue acetyltransferase component of pyruvate dehydrogenase complex, mitochondrial OS=Homo sapiens OX=9606 GN=DLAT PE=1 SV=3	1	8	8	8	7	4	7	0	0	0	7	4	7	0	0	0	7	4	7	0	0	0	11	11	11	68.996	647	647	0	32.496	9.6	7.7	11	0	0	0	109070000	54497000	20735000	33842000	0	0
P26641	P26641	2	2	2	Elongation factor 1-gamma	EEF1G	sp|P26641|EF1G_HUMAN Elongation factor 1-gamma OS=Homo sapiens OX=9606 GN=EEF1G PE=1 SV=3	1	2	2	2	1	2	0	0	0	0	1	2	0	0	0	0	1	2	0	0	0	0	5.9	5.9	5.9	50.118	437	437	0	5.9534	3	5.9	0	0	0	0	2071500	833120	1238300	0	0	0
P13929	P13929	2	1	1	Beta-enolase	ENO3	sp|P13929|ENOB_HUMAN Beta-enolase OS=Homo sapiens OX=9606 GN=ENO3 PE=1 SV=5	1	2	1	1	2	1	1	1	0	0	1	0	0	0	0	0	1	0	0	0	0	0	11.8	8.3	8.3	46.986	434	434	0	72.696	11.8	3.5	3.5	3.5	0	0	34542000	34542000	0	0	0	0
Q9Y285	Q9Y285	1	1	1	Phenylalanine--tRNA ligase alpha subunit	FARSA	sp|Q9Y285|SYFA_HUMAN Phenylalanine--tRNA ligase alpha subunit OS=Homo sapiens OX=9606 GN=FARSA PE=1 SV=3	1	1	1	1	0	1	1	0	0	0	0	1	1	0	0	0	0	1	1	0	0	0	2.2	2.2	2.2	57.563	508	508	0	3.2373	0	2.2	2.2	0	0	0	1028900	0	539470	489420	0	0
P49327	P49327	2	2	2	Fatty acid synthase;[Acyl-carrier-protein] S-acetyltransferase;[Acyl-carrier-protein] S-malonyltransferase;3-oxoacyl-[acyl-carrier-protein] synthase;3-oxoacyl-[acyl-carrier-protein] reductase;3-hydroxyacyl-[acyl-carrier-protein] dehydratase;Enoyl-[acyl-carrier-protein] reductase;Oleoyl-[acyl-carrier-protein] hydrolase	FASN	sp|P49327|FAS_HUMAN Fatty acid synthase OS=Homo sapiens OX=9606 GN=FASN PE=1 SV=3	1	2	2	2	2	0	0	0	0	0	2	0	0	0	0	0	2	0	0	0	0	0	1	1	1	273.42	2511	2511	0	3.332	1	0	0	0	0	0	1073000	1073000	0	0	0	0
Q5VVH2;P62942	Q5VVH2;P62942	1;1	1;1	1;1	Peptidyl-prolyl cis-trans isomerase;Peptidyl-prolyl cis-trans isomerase FKBP1A	FKBP1C;FKBP1A	tr|Q5VVH2|Q5VVH2_HUMAN Peptidylprolyl isomerase OS=Homo sapiens OX=9606 GN=FKBP1C PE=4 SV=1;sp|P62942|FKB1A_HUMAN Peptidyl-prolyl cis-trans isomerase FKBP1A OS=Homo sapiens OX=9606 GN=FKBP1A PE=1 SV=2	2	1	1	1	0	0	1	0	0	0	0	0	1	0	0	0	0	0	1	0	0	0	29.6	29.6	29.6	12.179	108	108;108	0	3.1783	0	0	29.6	0	0	0	2687200	0	0	2687200	0	0
Q9H4G4	Q9H4G4	3	3	3	Golgi-associated plant pathogenesis-related protein 1	GLIPR2	sp|Q9H4G4|GAPR1_HUMAN Golgi-associated plant pathogenesis-related protein 1 OS=Homo sapiens OX=9606 GN=GLIPR2 PE=1 SV=3	1	3	3	3	3	0	0	0	0	0	3	0	0	0	0	0	3	0	0	0	0	0	25.3	25.3	25.3	17.218	154	154	0	5.3103	25.3	0	0	0	0	0	2642300	2642300	0	0	0	0
Q5JWF2	Q5JWF2	4	2	2	Guanine nucleotide-binding protein G(s) subunit alpha isoforms XLas	GNAS	sp|Q5JWF2|GNAS1_HUMAN Guanine nucleotide-binding protein G(s) subunit alpha isoforms XLas OS=Homo sapiens OX=9606 GN=GNAS PE=1 SV=2	1	4	2	2	3	2	1	2	2	0	1	1	0	0	0	0	1	1	0	0	0	0	4.1	2.5	2.5	111.02	1037	1037	0	2.8847	2.5	2.6	1.1	1.5	1.5	0	1427500	512420	915060	0	0	0
P59768	P59768	1	1	1	Guanine nucleotide-binding protein G(I)/G(S)/G(O) subunit gamma-2	GNG2	sp|P59768|GBG2_HUMAN Guanine nucleotide-binding protein G(I)/G(S)/G(O) subunit gamma-2 OS=Homo sapiens OX=9606 GN=GNG2 PE=1 SV=2	1	1	1	1	1	1	0	0	0	0	1	1	0	0	0	0	1	1	0	0	0	0	16.9	16.9	16.9	7.8501	71	71	0.0083632	2.3426	16.9	16.9	0	0	0	0	352850	0	352850	0	0	0
P49773	P49773	1	1	1	Histidine triad nucleotide-binding protein 1	HINT1	sp|P49773|HINT1_HUMAN Histidine triad nucleotide-binding protein 1 OS=Homo sapiens OX=9606 GN=HINT1 PE=1 SV=2	1	1	1	1	1	1	0	0	0	0	1	1	0	0	0	0	1	1	0	0	0	0	21.4	21.4	21.4	13.802	126	126	0	20.287	21.4	21.4	0	0	0	0	11583000	7948400	3634900	0	0	0
P68431;Q16695;P84243;Q5TEC6;Q6NXT2	P68431;Q16695;P84243;Q5TEC6;Q6NXT2	5;4;4;3;3	1;0;0;0;0	1;0;0;0;0	Histone H3.1;Histone H3.1t;Histone H3.3;Histone H3;Histone H3.3C	HIST1H3A;HIST3H3;H3F3A;HIST2H3PS2;H3F3C	sp|P68431|H31_HUMAN Histone H3.1 OS=Homo sapiens OX=9606 GN=HIST1H3J PE=1 SV=2;sp|Q16695|H31T_HUMAN Histone H3.1t OS=Homo sapiens OX=9606 GN=HIST3H3 PE=1 SV=3;sp|P84243|H33_HUMAN Histone H3.3 OS=Homo sapiens OX=9606 GN=H3F3B PE=1 SV=2;tr|Q5TEC6|Q5TEC6_HUMA	5	5	1	1	2	1	1	4	4	2	1	0	0	0	0	0	1	0	0	0	0	0	45.6	23.5	23.5	15.404	136	136;136;136;136;135	0	128.91	30.1	6.6	6.6	22.1	22.1	11.8	14147000	14147000	0	0	0	0
P14923	P14923	2	2	2	Junction plakoglobin	JUP	sp|P14923|PLAK_HUMAN Junction plakoglobin OS=Homo sapiens OX=9606 GN=JUP PE=1 SV=3	1	2	2	2	2	1	0	0	0	0	2	1	0	0	0	0	2	1	0	0	0	0	4.6	4.6	4.6	81.744	745	745	0	3.738	4.6	2.7	0	0	0	0	1839900	1225200	614680	0	0	0
Q9ULL0	Q9ULL0	3	3	3	Uncharacterized protein KIAA1210	KIAA1210	sp|Q9ULL0|K1210_HUMAN Acrosomal protein KIAA1210 OS=Homo sapiens OX=9606 GN=KIAA1210 PE=2 SV=3	1	3	3	3	1	3	2	0	0	0	1	3	2	0	0	0	1	3	2	0	0	0	3	3	3	187.02	1709	1709	0	8.4178	0.9	3	2.3	0	0	0	7145600	1453400	5692300	0	0	0
P00338	P00338	3	3	3	L-lactate dehydrogenase A chain	LDHA	sp|P00338|LDHA_HUMAN L-lactate dehydrogenase A chain OS=Homo sapiens OX=9606 GN=LDHA PE=1 SV=2	1	3	3	3	1	2	1	0	0	0	1	2	1	0	0	0	1	2	1	0	0	0	22.6	22.6	22.6	36.688	332	332	0	52.395	10.5	16.6	6	0	0	0	17244000	7459600	5876300	3908200	0	0
P07195	P07195	1	1	1	L-lactate dehydrogenase B chain	LDHB	sp|P07195|LDHB_HUMAN L-lactate dehydrogenase B chain OS=Homo sapiens OX=9606 GN=LDHB PE=1 SV=2	1	1	1	1	1	0	0	0	0	0	1	0	0	0	0	0	1	0	0	0	0	0	6	6	6	36.638	334	334	0	189.5	6	0	0	0	0	0	59775000	59775000	0	0	0	0
P09382	P09382	2	2	2	Galectin-1	LGALS1	sp|P09382|LEG1_HUMAN Galectin-1 OS=Homo sapiens OX=9606 GN=LGALS1 PE=1 SV=2	1	2	2	2	2	1	1	0	0	0	2	1	1	0	0	0	2	1	1	0	0	0	34.1	34.1	34.1	14.716	135	135	0	11.966	34.1	13.3	13.3	0	0	0	29994000	16578000	7335500	6080900	0	0
P14174	P14174	2	2	2	Macrophage migration inhibitory factor	MIF	sp|P14174|MIF_HUMAN Macrophage migration inhibitory factor OS=Homo sapiens OX=9606 GN=MIF PE=1 SV=4	1	2	2	2	2	1	1	0	0	0	2	1	1	0	0	0	2	1	1	0	0	0	33.9	33.9	33.9	12.476	115	115	0	9.4873	33.9	9.6	9.6	0	0	0	9836300	6619300	1047600	2169400	0	0
P55209	P55209	1	1	1	Nucleosome assembly protein 1-like 1	NAP1L1	sp|P55209|NP1L1_HUMAN Nucleosome assembly protein 1-like 1 OS=Homo sapiens OX=9606 GN=NAP1L1 PE=1 SV=1	1	1	1	1	0	0	1	0	0	0	0	0	1	0	0	0	0	0	1	0	0	0	7.4	7.4	7.4	45.374	391	391	0	5.4638	0	0	7.4	0	0	0	3027400	0	0	3027400	0	0
Q9BPW8	Q9BPW8	1	1	1	Protein NipSnap homolog 1	NIPSNAP1	sp|Q9BPW8|NIPS1_HUMAN Protein NipSnap homolog 1 OS=Homo sapiens OX=9606 GN=NIPSNAP1 PE=1 SV=1	1	1	1	1	1	0	0	0	0	0	1	0	0	0	0	0	1	0	0	0	0	0	10.6	10.6	10.6	33.31	284	284	0.002445	2.5459	10.6	0	0	0	0	0	5057900	5057900	0	0	0	0
O15294	O15294	1	1	1	UDP-N-acetylglucosamine--peptide N-acetylglucosaminyltransferase 110 kDa subunit	OGT	sp|O15294|OGT1_HUMAN UDP-N-acetylglucosamine--peptide N-acetylglucosaminyltransferase 110 kDa subunit OS=Homo sapiens OX=9606 GN=OGT PE=1 SV=3	1	1	1	1	0	1	0	0	0	0	0	1	0	0	0	0	0	1	0	0	0	0	1.5	1.5	1.5	116.92	1046	1046	0	3.1803	0	1.5	0	0	0	0	433070	0	433070	0	0	0
Q9UQ80	Q9UQ80	1	1	1	Proliferation-associated protein 2G4	PA2G4	sp|Q9UQ80|PA2G4_HUMAN Proliferation-associated protein 2G4 OS=Homo sapiens OX=9606 GN=PA2G4 PE=1 SV=3	1	1	1	1	0	1	1	0	0	0	0	1	1	0	0	0	0	1	1	0	0	0	7.9	7.9	7.9	43.786	394	394	0	13.303	0	7.9	7.9	0	0	0	13444000	0	9072900	4371000	0	0
P11177	P11177	5	5	5	Pyruvate dehydrogenase E1 component subunit beta, mitochondrial	PDHB	sp|P11177|ODPB_HUMAN Pyruvate dehydrogenase E1 component subunit beta, mitochondrial OS=Homo sapiens OX=9606 GN=PDHB PE=1 SV=3	1	5	5	5	4	4	2	0	0	0	4	4	2	0	0	0	4	4	2	0	0	0	15.9	15.9	15.9	39.233	359	359	0	11.704	12.8	13.9	7.5	0	0	0	16929000	8637100	5866100	2426200	0	0
O00330	O00330	4	4	4	Pyruvate dehydrogenase protein X component, mitochondrial	PDHX	sp|O00330|ODPX_HUMAN Pyruvate dehydrogenase protein X component, mitochondrial OS=Homo sapiens OX=9606 GN=PDHX PE=1 SV=3	1	4	4	4	2	0	2	0	0	0	2	0	2	0	0	0	2	0	2	0	0	0	11.8	11.8	11.8	54.122	501	501	0	8.0136	6	0	5.8	0	0	0	1840800	0	0	1840800	0	0
P18669;P15259;Q8N0Y7	P18669	3;1;1	3;1;1	3;1;1	Phosphoglycerate mutase 1	PGAM1	sp|P18669|PGAM1_HUMAN Phosphoglycerate mutase 1 OS=Homo sapiens OX=9606 GN=PGAM1 PE=1 SV=2	3	3	3	3	3	2	1	0	0	0	3	2	1	0	0	0	3	2	1	0	0	0	24.4	24.4	24.4	28.804	254	254;253;254	0	60.782	24.4	18.9	10.6	0	0	0	64961000	29376000	29393000	6191700	0	0
P52209	P52209	1	1	1	6-phosphogluconate dehydrogenase, decarboxylating	PGD	sp|P52209|6PGD_HUMAN 6-phosphogluconate dehydrogenase, decarboxylating OS=Homo sapiens OX=9606 GN=PGD PE=1 SV=3	1	1	1	1	1	1	0	0	0	0	1	1	0	0	0	0	1	1	0	0	0	0	3.3	3.3	3.3	53.139	483	483	0	21.541	3.3	3.3	0	0	0	0	6479700	3135900	3343700	0	0	0
P62937	P62937	2	2	2	Peptidyl-prolyl cis-trans isomerase A;Peptidyl-prolyl cis-trans isomerase A, N-terminally processed	PPIA	sp|P62937|PPIA_HUMAN Peptidyl-prolyl cis-trans isomerase A OS=Homo sapiens OX=9606 GN=PPIA PE=1 SV=2	1	2	2	2	2	0	1	0	0	0	2	0	1	0	0	0	2	0	1	0	0	0	20	20	20	18.012	165	165	0	46.697	20	0	10.9	0	0	0	9482200	6410100	0	3072100	0	0
P30044	P30044	1	1	1	Peroxiredoxin-5, mitochondrial	PRDX5	sp|P30044|PRDX5_HUMAN Peroxiredoxin-5, mitochondrial OS=Homo sapiens OX=9606 GN=PRDX5 PE=1 SV=4	1	1	1	1	1	0	0	0	0	0	1	0	0	0	0	0	1	0	0	0	0	0	9.8	9.8	9.8	22.086	214	214	0	14.789	9.8	0	0	0	0	0	6283600	6283600	0	0	0	0
P25787	P25787	1	1	1	Proteasome subunit alpha type-2	PSMA2	sp|P25787|PSA2_HUMAN Proteasome subunit alpha type-2 OS=Homo sapiens OX=9606 GN=PSMA2 PE=1 SV=2	1	1	1	1	1	0	0	0	0	0	1	0	0	0	0	0	1	0	0	0	0	0	8.5	8.5	8.5	25.898	234	234	0	4.1877	8.5	0	0	0	0	0	5764100	5764100	0	0	0	0
P60900	P60900	1	1	1	Proteasome subunit alpha type-6	PSMA6	sp|P60900|PSA6_HUMAN Proteasome subunit alpha type-6 OS=Homo sapiens OX=9606 GN=PSMA6 PE=1 SV=1	1	1	1	1	1	0	0	0	0	0	1	0	0	0	0	0	1	0	0	0	0	0	8.1	8.1	8.1	27.399	246	246	0	3.5392	8.1	0	0	0	0	0	8727400	8727400	0	0	0	0
P31949	P31949	1	1	1	Protein S100-A11;Protein S100-A11, N-terminally processed	S100A11	sp|P31949|S10AB_HUMAN Protein S100-A11 OS=Homo sapiens OX=9606 GN=S100A11 PE=1 SV=2	1	1	1	1	1	1	0	0	0	0	1	1	0	0	0	0	1	1	0	0	0	0	30.5	30.5	30.5	11.74	105	105	0	222.63	30.5	30.5	0	0	0	0	146550000	120080000	26465000	0	0	0
O14828	O14828	1	1	1	Secretory carrier-associated membrane protein 3	SCAMP3	sp|O14828|SCAM3_HUMAN Secretory carrier-associated membrane protein 3 OS=Homo sapiens OX=9606 GN=SCAMP3 PE=1 SV=3	1	1	1	1	1	0	0	0	0	0	1	0	0	0	0	0	1	0	0	0	0	0	5.2	5.2	5.2	38.287	347	347	0.0072202	2.3898	5.2	0	0	0	0	0	788660	788660	0	0	0	0
P34897	P34897	1	1	1	Serine hydroxymethyltransferase, mitochondrial	SHMT2	sp|P34897|GLYM_HUMAN Serine hydroxymethyltransferase, mitochondrial OS=Homo sapiens OX=9606 GN=SHMT2 PE=1 SV=3	1	1	1	1	1	1	0	0	0	0	1	1	0	0	0	0	1	1	0	0	0	0	7.5	7.5	7.5	55.992	504	504	0	14.781	7.5	7.5	0	0	0	0	10677000	7067900	3609300	0	0	0
Q15758	Q15758	1	1	1	Neutral amino acid transporter B(0)	SLC1A5	sp|Q15758|AAAT_HUMAN Neutral amino acid transporter B(0) OS=Homo sapiens OX=9606 GN=SLC1A5 PE=1 SV=2	1	1	1	1	0	0	1	0	0	0	0	0	1	0	0	0	0	0	1	0	0	0	5.5	5.5	5.5	56.598	541	541	0	21.224	0	0	5.5	0	0	0	11237000	0	0	11237000	0	0
O00161	O00161	2	2	2	Synaptosomal-associated protein 23	SNAP23	sp|O00161|SNP23_HUMAN Synaptosomal-associated protein 23 OS=Homo sapiens OX=9606 GN=SNAP23 PE=1 SV=1	1	2	2	2	2	1	0	0	0	0	2	1	0	0	0	0	2	1	0	0	0	0	12.3	12.3	12.3	23.354	211	211	0	6.7954	12.3	5.7	0	0	0	0	3224500	2571000	653540	0	0	0
P00441	P00441	1	1	1	Superoxide dismutase [Cu-Zn]	SOD1	sp|P00441|SODC_HUMAN Superoxide dismutase [Cu-Zn] OS=Homo sapiens OX=9606 GN=SOD1 PE=1 SV=2	1	1	1	1	1	1	0	0	0	0	1	1	0	0	0	0	1	1	0	0	0	0	22.1	22.1	22.1	15.936	154	154	0	3.4007	22.1	22.1	0	0	0	0	11787000	10363000	1423700	0	0	0
Q15005	Q15005	1	1	1	Signal peptidase complex subunit 2	SPCS2	sp|Q15005|SPCS2_HUMAN Signal peptidase complex subunit 2 OS=Homo sapiens OX=9606 GN=SPCS2 PE=1 SV=3	1	1	1	1	1	1	1	0	0	0	1	1	1	0	0	0	1	1	1	0	0	0	4	4	4	25.003	226	226	0.0012563	2.8631	4	4	4	0	0	0	2857100	1237100	922680	697380	0	0
Q69YQ0	Q69YQ0	2	2	2	Cytospin-A	SPECC1L	sp|Q69YQ0|CYTSA_HUMAN Cytospin-A OS=Homo sapiens OX=9606 GN=SPECC1L PE=1 SV=2	1	2	2	2	2	1	1	0	0	0	2	1	1	0	0	0	2	1	1	0	0	0	2.6	2.6	2.6	124.6	1117	1117	0	4.9954	2.6	1.6	1.6	0	0	0	12792000	4279500	6131400	2381100	0	0
Q13813	Q13813	3	3	3	Spectrin alpha chain, non-erythrocytic 1	SPTAN1	sp|Q13813|SPTN1_HUMAN Spectrin alpha chain, non-erythrocytic 1 OS=Homo sapiens OX=9606 GN=SPTAN1 PE=1 SV=3	1	3	3	3	1	3	0	0	0	0	1	3	0	0	0	0	1	3	0	0	0	0	1.6	1.6	1.6	284.54	2472	2472	0	9.6697	0.5	1.6	0	0	0	0	4966900	1012400	3954500	0	0	0
Q01082	Q01082	3	3	3	Spectrin beta chain, non-erythrocytic 1	SPTBN1	sp|Q01082|SPTB2_HUMAN Spectrin beta chain, non-erythrocytic 1 OS=Homo sapiens OX=9606 GN=SPTBN1 PE=1 SV=2	1	3	3	3	2	1	0	0	0	0	2	1	0	0	0	0	2	1	0	0	0	0	1.8	1.8	1.8	274.61	2364	2364	0	4.5457	1.4	0.5	0	0	0	0	4268100	3506800	761330	0	0	0
P37802	P37802	1	1	1	Transgelin-2	TAGLN2	sp|P37802|TAGL2_HUMAN Transgelin-2 OS=Homo sapiens OX=9606 GN=TAGLN2 PE=1 SV=3	1	1	1	1	1	0	0	0	0	0	1	0	0	0	0	0	1	0	0	0	0	0	13.6	13.6	13.6	22.391	199	199	0	4.0493	13.6	0	0	0	0	0	2751900	2751900	0	0	0	0
Q15370	Q15370	1	1	1	Transcription elongation factor B polypeptide 2	TCEB2	sp|Q15370|ELOB_HUMAN Elongin-B OS=Homo sapiens OX=9606 GN=ELOB PE=1 SV=1	1	1	1	1	1	0	0	0	0	0	1	0	0	0	0	0	1	0	0	0	0	0	15.3	15.3	15.3	13.133	118	118	0	4.0653	15.3	0	0	0	0	0	1137400	1137400	0	0	0	0
P29401	P29401	1	1	1	Transketolase	TKT	sp|P29401|TKT_HUMAN Transketolase OS=Homo sapiens OX=9606 GN=TKT PE=1 SV=3	1	1	1	1	1	1	1	0	0	0	1	1	1	0	0	0	1	1	1	0	0	0	6.6	6.6	6.6	67.877	623	623	0	16.051	6.6	6.6	6.6	0	0	0	21960000	14282000	2071600	5606800	0	0
P60174	P60174	4	4	4	Triosephosphate isomerase	TPI1	sp|P60174|TPIS_HUMAN Triosephosphate isomerase OS=Homo sapiens OX=9606 GN=TPI1 PE=1 SV=3	1	4	4	4	4	2	0	0	0	0	4	2	0	0	0	0	4	2	0	0	0	0	25.9	25.9	25.9	30.791	286	286	0	62.594	25.9	16.8	0	0	0	0	30633000	22736000	7896900	0	0	0
Q13509	Q13509	15	1	1	Tubulin beta-3 chain	TUBB3	sp|Q13509|TBB3_HUMAN Tubulin beta-3 chain OS=Homo sapiens OX=9606 GN=TUBB3 PE=1 SV=2	1	15	1	1	12	8	9	8	12	10	1	1	0	0	0	0	1	1	0	0	0	0	29.1	3.1	3.1	50.432	450	450	0	3.9302	25.6	23.1	23.3	18.2	25.8	25.8	6519800	4657500	1862300	0	0	0
Q9BUF5	Q9BUF5	10	3	3	Tubulin beta-6 chain	TUBB6	sp|Q9BUF5|TBB6_HUMAN Tubulin beta-6 chain OS=Homo sapiens OX=9606 GN=TUBB6 PE=1 SV=1	1	10	3	3	9	8	6	4	6	6	2	3	1	0	0	1	2	3	1	0	0	1	32.7	11	11	49.857	446	446	0	8.0999	29.1	30.5	23.5	8.7	13	14.6	12734000	4685700	3898100	4149900	0	0
P09936	P09936	1	1	1	Ubiquitin carboxyl-terminal hydrolase isozyme L1	UCHL1	sp|P09936|UCHL1_HUMAN Ubiquitin carboxyl-terminal hydrolase isozyme L1 OS=Homo sapiens OX=9606 GN=UCHL1 PE=1 SV=2	1	1	1	1	1	1	1	0	0	0	1	1	1	0	0	0	1	1	1	0	0	0	17	17	17	24.824	223	223	0	208.6	17	17	17	0	0	0	78906000	32746000	34877000	11282000	0	0
O60701	O60701	1	1	1	UDP-glucose 6-dehydrogenase	UGDH	sp|O60701|UGDH_HUMAN UDP-glucose 6-dehydrogenase OS=Homo sapiens OX=9606 GN=UGDH PE=1 SV=1	1	1	1	1	1	0	0	0	0	0	1	0	0	0	0	0	1	0	0	0	0	0	5.9	5.9	5.9	55.023	494	494	0	3.4899	5.9	0	0	0	0	0	1130700	1130700	0	0	0	0
[truncated: 16 more columns]
